# Supplementary material for: Gene regulation in Aspergillus oryzae promotes hyphal growth and flavor formation in soy sauce koji
Source: Royal Society of Chemistry journal article supplement (doi:10.1039/c4ra16819d), 2015-01-01
Supplement: c4ra16819d2.xlsx [file c4ra16819d2.xlsx]

## Sheet: Table S1
3.042 ID	100-8 ID	locus	3.042_30h_FPKM	3.042_36h_FPKM	3.042_42h_FPKM	100-8_30h_FPKM	100-8_36h_FPKM	100-8_42h_FPKM
Ao3042_00001	AO1008_11216	Contig100:2398-4120	12.2887	5.02135	1.55862	48.7117	50.0312	28.8044
Ao3042_00002	AO1008_11217	Contig100:4420-5300	15.3155	16.6625	23.7993	64.7345	74.9889	68.2017
Ao3042_00003	AO1008_11218	Contig100:5731-7459	18.7361	9.28805	8.19193	98.0524	80.3333	66.3677
Ao3042_00004	AO1008_11219	Contig100:7477-9347	773.522	978.146	1659.64	25.9767	128.26	520.603
Ao3042_00005	AO1008_11220	Contig100:13316-15200	0	0.545964	0	0	0	0.273297
Ao3042_00006	AO1008_11221	Contig100:15637-16309	0	0	0.453638	0.224548	0.306436	0
Ao3042_00007	AO1008_11222	Contig100:16359-16787	0	0	2.05767	0	0	0.542469
Ao3042_00008	AO1008_11223	Contig100:19506-20076	0	0.441614	38.6473	0	0	1.47012
Ao3042_00009	AO1008_11224	Contig100:21096-24368	6.58454	11.1734	9.62327	4.32299	11.5539	23.4002
Ao3042_00010	AO1008_11225	Contig100:24563-27706	24.119	17.9866	24.3616	28.0489	33.3281	24.3624
Ao3042_00011	AO1008_11226	Contig100:27817-29518	47.0184	39.9433	43.744	51.0224	43.6416	41.6329
Ao3042_00012	AO1008_11227	Contig100:29666-31763	13.748	10.2622	11.7937	14.0904	14.075	8.56405
Ao3042_00013	AO1008_11228	Contig100:31864-35524	11.9725	7.36574	8.18908	32.7092	25.1998	21.8365
Ao3042_00014	AO1008_11229	Contig100:37712-42108	37.5803	40.2656	38.9351	29.5901	37.8315	35.9551
Ao3042_00016	AO1008_11231	Contig100:42123-44097	63.1235	82.7476	75.0274	64.026	55.1078	65.9867
Ao3042_00017	AO1008_11232	Contig100:44255-47487	7.77762	6.77773	7.07942	9.99098	18.969	23.981
Ao3042_00018	AO1008_11233	Contig100:44255-47487	21.4831	39.8374	35.7361	21.8416	32.2449	39.0575
Ao3042_00019	AO1008_11234	Contig100:47726-51249	96.5688	135.98	139.876	55.1232	65.6355	79.9406
Ao3042_00020	AO1008_11235	Contig100:51701-54347	99.3566	75.0548	91.4312	52.2516	91.9096	81.6395
Ao3042_00021	AO1008_11236	Contig100:54476-57857	0.808698	0.628103	0.802685	0.197848	0.26916	0.713097
Ao3042_00022	AO1008_11237	Contig100:59397-60423	0.357406	0	0	0	0	0.177204
Ao3042_00023	AO1008_11238	Contig100:67012-68982	4.23403	1.8551	2.36821	1.16831	2.28608	1.39317
Ao3042_00024	AO1008_11239	Contig100:70376-72274	38.7154	9.96917	4.65553	3.44536	9.17179	4.13883
Ao3042_00025	AO1008_11240	Contig100:73051-75193	10.3218	4.47544	2.92997	2.0236	4.03337	1.76192
Ao3042_00026	AO1008_11241	Contig100:76093-77175	0.408026	0	0	0.127015	0.17305	0
Ao3042_00027	AO1008_11242	Contig100:77687-81616	4.29192	6.05906	3.09531	4.21219	7.09988	4.66898
Ao3042_00028	AO1008_11243	Contig100:77687-81616	38.9723	39.1224	22.3818	24.6244	66.0625	84.2409
Ao3042_00029	AO1008_11244	Contig100:81747-83813	485.657	543.604	302.25	196.047	767.094	1028.68
Ao3042_00030	AO1008_11245	Contig100:84136-86873	388.116	354.289	224.338	480.387	501.052	559.667
Ao3042_00031	AO1008_11246	Contig100:87286-89082	182.548	194.087	216.651	421.678	180.111	389.097
Ao3042_00032	AO1008_11247	Contig100:89342-90476	38.9544	53.1165	46.9416	34.8433	39.4443	44.7999
Ao3042_00033	AO1008_11248	Contig100:90614-93660	108.473	102.749	101.605	163.641	99.0571	131.493
Ao3042_00034	AO1008_11249	Contig100:93815-98359	65.6385	64.1895	67.6543	69.9986	68.4383	60.3262
Ao3042_00035	AO1008_11250	Contig100:99651-103829	12.8371	12.1713	19.6956	5.11229	8.36123	10.0004
Ao3042_00036	AO1008_11251	Contig100:104891-106287	110.867	68.4653	110.922	42.0347	66.5737	52.9389
Ao3042_00037	AO1008_11252	Contig100:106596-108381	218.998	136.941	145.069	131.959	177.71	206.796
Ao3042_00038	AO1008_11253	Contig100:109164-110648	9.84379	8.89983	8.02534	14.2991	9.07803	10.2401
Ao3042_00039	AO1008_11254	Contig100:110958-112851	1.53732	3.11125	5.8045	2.71298	1.84653	5.35187
Ao3042_00040	AO1008_11255	Contig100:112904-115031	1.64347	1.31563	5.29853	2.03973	2.6893	3.58097
Ao3042_00041	AO1008_11256	Contig100:118018-120267	1.75683	1.55957	1.65864	4.09211	3.34262	2.51567
Ao3042_00042	AO1008_11257	Contig100:121274-123422	28.5148	25.6575	33.1435	41.0225	41.1956	42.8908
Ao3042_00043	AO1008_11258	Contig100:123880-127456	19.7656	69.8282	53.131	181.691	79.858	235.29
Ao3042_00044	AO1008_11259	Contig100:128184-130246	0.536903	0.662031	1.01384	0.583653	2.1568	5.47929
Ao3042_00045	AO1008_11260	Contig100:132099-133005	0	0	0.403953	0.199845	0	0.211741
Ao3042_00046	AO1008_11261	Contig100:133719-134268	0	0	0	0	0	0
Ao3042_00047	AO1008_11262	Contig100:136789-138145	17.0323	3.65582	4.43958	60.8272	40.9021	7.31786
Ao3042_00048	AO1008_11263	Contig100:138784-141074	14.5763	6.26926	6.61473	122.53	44.7039	18.5028
Ao3042_00049	AO1008_11264	Contig100:141107-143265	14.4143	12.2505	19.0155	5.63874	12.0356	11.4509
Ao3042_00050	AO1008_11265	Contig100:143562-147301	3.69002	2.37813	3.17484	5.36051	5.16319	4.30612
Ao3042_00051	AO1008_01589	Contig100:148127-152100	39.909	56.9379	64.4784	37.6632	48.753	29.0131
Ao3042_00052	AO1008_01590	Contig100:154244-155722	14.1018	17.1652	21.4796	11.3171	8.88643	8.96893
Ao3042_00053	AO1008_01591	Contig100:157871-163158	11.5243	54.1842	94.9336	4.3704	7.3662	25.7289
Ao3042_00054	AO1008_01592	Contig100:157871-163158	35.7425	40.2857	56.1467	31.7488	50.3681	52.6273
Ao3042_00055	AO1008_01593	Contig100:163883-166353	12.325	20.0785	7.92431	3.70179	4.19755	4.52353
Ao3042_00056	AO1008_01594	Contig100:166360-168226	30.5078	27.8184	20.0954	21.4017	20.137	18.1299
Ao3042_00058	AO1008_01596	Contig100:170647-172206	45.9257	131.378	99.6084	150.431	187.055	68.8321
Ao3042_00059	AO1008_01597	Contig100:172725-174239	12.8146	17.245	17.6021	32.305	38.1956	15.058
Ao3042_00060	AO1008_01598	Contig100:174359-175240	17.3489	42.2563	26.2908	43.9848	33.3865	31.002
Ao3042_00061	AO1008_01599	Contig100:175570-176005	4.68924	10.2908	4.06245	6.05659	9.94833	10.6882
Ao3042_00062	AO1008_01600	Contig100:176243-178063	2.91462	3.39763	4.83642	6.00729	7.50622	4.79729
Ao3042_00063	AO1008_01601	Contig100:179361-180574	19.0842	41.9591	33.1478	72.496	65.3134	69.1315
Ao3042_00064	AO1008_01603	Contig100:184821-190223	37.5166	27.1178	18.613	16.0699	40.158	38.1518
Ao3042_00065	AO1008_01604	Contig100:193292-194896	17.3997	14.4954	15.802	45.2835	28.4753	14.2768
Ao3042_00066	AO1008_01605	Contig100:195215-198484	19.1292	14.4957	17.7811	33.5151	28.5206	27.5528
Ao3042_00067	AO1008_01606	Contig100:198928-200455	990.902	965.422	658.521	128.664	363.47	364.641
Ao3042_00068	AO1008_01607	Contig100:203461-206281	48.4822	54.0784	36.1711	39.5082	50.7677	51.2847
Ao3042_00069	AO1008_01608	Contig100:206761-207606	2.9996	11.1758	12.1792	3.61529	4.38376	5.53291
Ao3042_00070	AO1008_01609	Contig100:208206-210003	0.266422	0	0.335385	0.330984	0.337958	0.0877048
Ao3042_00071	AO1008_01610	Contig100:211906-213716	25.5386	49.912	75.6803	30.5655	33.1378	39.3281
Ao3042_00072	AO1008_01611	Contig100:217765-220485	26.2193	23.1981	25.7927	34.5127	35.0847	29.3419
Ao3042_00073	AO1008_01612	Contig100:221767-222515	3.20516	33.8673	70.137	0.231485	2.84345	11.281
Ao3042_00074	AO1008_01613	Contig100:223160-224253	1.21007	42.285	81.5983	0.251103	3.76315	17.1644
Ao3042_00075	AO1008_01614	Contig100:224293-224845	2.13516	38.499	70.4002	0.3359	4.1333	10.3164
Ao3042_00076	AO1008_01615	Contig100:226929-227909	41.9557	562.273	947.971	4.76333	99.6465	354.54
Ao3042_00077	AO1008_01616	Contig100:228170-232747	5.55451	32.5458	36.8435	0.163828	3.86244	13.1706
Ao3042_00078	AO1008_01617	Contig100:239433-242331	7.43416	15.0161	14.3155	5.56988	11.1719	10.638
Ao3042_00080	AO1008_01619	Contig100:243930-246506	0.123951	6.59221	23.9727	0	0.706331	2.6898
Ao3042_00081	AO1008_01620	Contig100:248608-249324	0	1.82648	2.78409	0	0	0.243361
Ao3042_00082	AO1008_01621	Contig100:250648-251381	0	8.85242	21.4514	0	0	3.21586
Ao3042_00083	AO1008_01622	Contig100:254176-254539	0	0	0	0	0	1.8131
Ao3042_00084	AO1008_07479	Contig101:688-2014	0.377806	0.373463	0.238042	0.822852	0.16013	0.124581
Ao3042_00085	AO1008_07480	Contig101:2743-5923	75.5641	63.4179	57.6517	133.404	91.5289	76.3051
Ao3042_00086	AO1008_07481	Contig101:6506-7955	21.639	19.3185	19.9494	26.934	23.3998	20.1568
Ao3042_00087	AO1008_07482	Contig101:8000-13662	107.886	49.1227	66.9375	115.772	198.843	102.019
Ao3042_00088	AO1008_07483	Contig101:8000-13662	73.1388	52.3874	44.2125	170.368	79.1383	60.1992
Ao3042_00089	AO1008_07484	Contig101:13857-14874	5.54786	5.20144	5.52228	7.63885	9.85148	6.07142
Ao3042_00090	AO1008_07485	Contig101:14924-16999	80.6795	54.6656	134.553	19.2993	28.6474	42.4107
Ao3042_00091	AO1008_07486	Contig101:17649-18510	1.79077	0.764348	3.88233	1.4418	0.984058	0.763712
Ao3042_00092	AO1008_05172	Contig103:4928-5982	0	0.222039	0	0.279494	0	0.296189
Ao3042_00093	AO1008_05173	Contig103:6125-7721	0.209082	0	0	0	0	0
Ao3042_00094	AO1008_05174	Contig103:8891-10671	0.0863161	0.383087	0.651907	0	0.21895	0.17047
Ao3042_00095	AO1008_05175	Contig103:11973-12641	0.414003	0	0	0	0	0
Ao3042_00096	AO1008_05176	Contig103:12688-13354	0	0	0	0	0	0
Ao3042_00097	AO1008_05177	Contig103:13514-14090	0.414003	0	0	0	0	0
Ao3042_00098	AO1008_05178	Contig103:18524-20466	3.57609	1.76279	3.15042	0	1.41045	0.0784489
Ao3042_00099	AO1008_05179	Contig103:21040-21735	0.512663	1.53177	1.94504	0.240783	0.986042	0
Ao3042_00100	AO1008_05180	Contig103:24117-24516	10.1586	3.66152	10.158	0	2.51809	2.43211
Ao3042_00101	AO1008_05181	Contig103:25013-25883	11.312	21.9434	17.3575	0	8.01048	0.729859
Ao3042_00102	AO1008_05182	Contig103:26876-29512	13.9997	8.58061	6.87633	3.73449	11.3662	9.06338
Ao3042_00103	AO1008_05183	Contig103:29808-33868	36.1125	23.3329	29.4323	1.81419	13.9572	4.01589
Ao3042_00104	AO1008_05184	Contig103:29808-33868	5.5678	2.57288	1.81284	0.137577	2.03906	0
Ao3042_00105	AO1008_05185	Contig103:34897-35944	0.564841	0.209565	0.267027	0	0.359457	0.279577
Ao3042_00106	AO1008_05186	Contig103:36155-37241	1.35438	0.401864	0.768217	0.252958	0.172318	0.536158
Ao3042_00107	AO1008_05187	Contig103:37401-38019	1.0145	4.0608	1.28591	0	0.43592	0.675554
Ao3042_00108	AO1008_05188	Contig103:41605-42890	0.140749	0	0.532303	0	0	0
Ao3042_00109	AO1008_05189	Contig103:44392-45124	0	0.320926	0	0	0	0
Ao3042_00110	AO1008_05190	Contig103:46302-47581	3.32724	7.40564	5.24278	4.66142	8.29181	4.25391
Ao3042_00111	AO1008_05191	Contig103:48553-49647	16.1873	28.5754	38.888	11.4452	14.6676	16.1721
Ao3042_00112	AO1008_05192	Contig103:50624-52163	0.27551	7.33892	29.8295	0	0.116518	2.35843
Ao3042_00114	AO1008_05459	Contig104:1518-4509	1.82084	7.17279	5.49693	2.08959	2.61301	5.32798
Ao3042_00115	AO1008_05460	Contig104:6601-8114	17.2575	6.90739	3.97378	32.6753	22.7418	38.6396
Ao3042_00116	AO1008_05461	Contig104:8833-10727	5.12493	8.57501	3.4897	24.6528	13.4242	9.53973
Ao3042_00117	AO1008_05462	Contig104:11988-15570	0.129351	0.381778	2.03286	0	0	0.127481
Ao3042_00118	AO1008_05463	Contig104:16020-17386	14.3453	10.2347	5.34081	5.8583	6.38212	3.62197
Ao3042_00119	AO1008_05464	Contig104:19335-21491	640.584	787.708	758.889	1812.6	783.714	1111.94
Ao3042_00120	AO1008_05465	Contig104:19335-21491	96.8642	92.0662	95.5663	214.583	115.867	166.611
Ao3042_00121	AO1008_05466	Contig104:21721-23395	8.42899	7.16489	10.4982	13.9534	10.9203	10.5387
Ao3042_00122	AO1008_05467	Contig104:24042-28537	15.6982	13.8446	13.1275	14.9327	13.9469	13.1359
Ao3042_00124	AO1008_05469	Contig104:28734-33170	40.4074	35.7631	39.2296	67.1655	43.1904	36.2889
Ao3042_00125	AO1008_05470	Contig104:34622-36466	1.18936	7.91728	12.5112	2.21595	1.4006	2.01324
Ao3042_00126	AO1008_05471	Contig104:38429-40728	47.9737	24.906	22.0032	57.5601	38.765	22.0677
Ao3042_00127	AO1008_05472	Contig104:40902-45159	15.1935	8.45447	10.0402	11.2065	10.8879	7.25154
Ao3042_00128	AO1008_05473	Contig104:45359-50780	23.1206	24.5009	27.0884	31.6455	24.9578	35.9992
Ao3042_00129	AO1008_05474	Contig104:45359-50780	0	0	0	0	6.52068	0
Ao3042_00130	AO1008_05475	Contig104:50842-53197	42.2378	43.8853	37.9327	49.4575	43.0552	38.6576
Ao3042_00131	AO1008_05476	Contig104:53300-56321	11.3592	9.64538	14.5347	4.41624	7.66935	10.9991
Ao3042_00132	AO1008_05477	Contig104:57242-60021	9.47648	13.3072	11.7553	11.4005	14.4038	18.1784
Ao3042_00133	AO1008_05478	Contig104:60040-62904	69.6781	60.1492	61.6634	123.041	95.9592	104.054
Ao3042_00134	AO1008_05479	Contig104:64280-69428	9.78329	7.01918	7.60267	10.8652	11.4017	10.2232
Ao3042_00135	AO1008_05480	Contig104:70726-73742	26.4786	18.6589	21.6753	10.6432	15.0036	15.8589
Ao3042_00136	AO1008_05481	Contig104:74540-76796	13.2479	10.4417	14.7443	2.40301	2.668	2.94937
Ao3042_00137	AO1008_05482	Contig104:80046-80820	64.197	61.4369	48.41	54.8627	43.9691	38.7538
Ao3042_00138	AO1008_05483	Contig104:82008-84497	22.752	28.6775	19.8264	14.6368	31.0246	51.7608
Ao3042_00139	AO1008_05484	Contig104:84748-87578	149.984	133.335	93.6386	114.788	182.328	194.371
Ao3042_00140	AO1008_05485	Contig104:87819-89835	13.4187	9.96958	7.23594	19.3	17.5421	16.2541
Ao3042_00141	AO1008_05486	Contig104:89956-94778	66.287	35.2417	41.8986	40.5962	59.6263	40.7546
Ao3042_00142	AO1008_05487	Contig104:96469-99224	9.88982	3.92813	4.92412	9.4778	11.4344	5.39468
Ao3042_00143	AO1008_05488	Contig104:100940-103756	6.83656	9.87872	8.44522	4.96956	4.0812	7.11896
Ao3042_00144	AO1008_05489	Contig104:105865-106924	18.6773	26.0606	15.0228	21.3507	52.1501	31.1807
Ao3042_00145	AO1008_05490	Contig104:108427-110021	78.0613	74.7483	70.238	78.9058	77.4844	74.2
Ao3042_00147	AO1008_05492	Contig104:113731-117194	36.0821	32.4865	22.603	52.3843	79.8438	60.1661
Ao3042_00148	AO1008_05493	Contig104:118252-119982	334.846	117.316	49.7652	1347.65	763.162	404.65
Ao3042_00149	AO1008_05494	Contig104:122171-123781	13.5704	10.4816	5.572	18.9749	15.1027	20.0143
Ao3042_00150	AO1008_05495	Contig104:125804-126810	542.08	46.5817	35.7082	420.666	609.84	76.5864
Ao3042_00151	AO1008_05496	Contig104:131604-132923	0	0	0	0	0	0
Ao3042_00152	AO1008_05497	Contig104:133312-134436	0	0	0	0	0	0
Ao3042_00153	AO1008_05498	Contig104:135501-135897	0	0	0	0	0	0
Ao3042_00154	AO1008_05499	Contig104:136001-136697	0	0	0	0	0	0
Ao3042_00155	AO1008_05500	Contig104:137294-139363	0	0	0	0	0	0.204655
Ao3042_00156	AO1008_05501	Contig104:140659-141953	0.70607	15.8709	47.5903	1.09799	4.18745	9.30953
Ao3042_00157	AO1008_05502	Contig104:141986-145625	29.5038	17.1972	21.1331	20.3425	22.3144	21.9262
Ao3042_00158	AO1008_05503	Contig104:145813-147491	85.2503	66.8806	57.1571	133.421	86.9183	98.0379
Ao3042_00159	AO1008_05504	Contig104:148234-151521	87.6591	110.071	140.77	90.9147	89.9946	86.497
Ao3042_00160	AO1008_05505	Contig104:151659-154549	4.33834	8.08502	9.22108	4.25726	2.77594	5.43839
Ao3042_00161	AO1008_05506	Contig104:151659-154549	8.46592	9.07612	8.53262	9.24266	9.91875	9.73357
Ao3042_00162	AO1008_05507	Contig104:154728-156934	52.6627	42.5279	48.2078	103.867	113.914	78.2363
Ao3042_00163	AO1008_05508	Contig104:157013-158378	15.1299	15.5426	24.6218	29.254	23.0066	31.3327
Ao3042_00164	AO1008_05509	Contig104:158662-159669	91.2035	96.2036	125.216	162.832	157.165	106.669
Ao3042_00165	AO1008_05510	Contig104:161342-162615	93.3643	112.412	133.655	127.599	148.847	122.488
Ao3042_00166	AO1008_05511	Contig104:162855-170717	7.99448	5.32925	4.18355	11.0607	6.86554	3.61964
Ao3042_00167	AO1008_05512	Contig104:162855-170717	30.049	31.5103	24.946	38.8259	29.769	28.4578
Ao3042_00168	AO1008_05513	Contig104:172599-174247	37.491	73.5244	72.307	13.442	33.5506	21.811
Ao3042_00170	AO1008_01783	Contig105:16875-18202	0	0	6.17599	0	0.148327	0.461673
Ao3042_00171	AO1008_01784	Contig105:19142-20314	0	0.193572	5.1813	0	0.166001	0.645686
Ao3042_00172	AO1008_01785	Contig105:21258-22122	0	0.572335	27.6699	0	0	0.190768
Ao3042_00173	AO1008_01786	Contig105:23161-25174	0	0.609159	3.75972	0	0	0.0677817
Ao3042_00174	AO1008_01787	Contig105:27946-28435	1.80919	0.54388	1.37682	1.02493	0.934306	2.89451
Ao3042_00175	AO1008_01788	Contig105:28563-29590	2.88731	0.857142	3.27621	1.88823	2.57294	3.00157
Ao3042_00176	AO1008_01789	Contig105:30411-31340	0	0.787433	0	0	0	0.350017
Ao3042_00177	AO1008_01790	Contig105:33826-35182	0.527829	0.469037	1.19657	1.08284	0.93838	2.19102
Ao3042_00178	AO1008_01791	Contig105:35473-38832	28.1481	21.1391	37.4423	0.0389399	1.74817	8.13204
Ao3042_00179	AO1008_01792	Contig105:39563-40004	1.52546	0	4.85679	0.483567	0	2.55943
Ao3042_00180	AO1008_01793	Contig105:41425-43876	0.534787	2.56841	1.13536	0.0622198	1.01614	1.45096
Ao3042_00181	AO1008_01794	Contig105:44223-45897	0	0.123952	0.15821	0	0	0
Ao3042_00182	AO1008_01795	Contig105:46178-47195	0	0	0	0.306918	0	0
Ao3042_00183	AO1008_01796	Contig105:48693-49860	0.249681	1.11058	0.471931	0.349566	0.476179	0.493966
Ao3042_00184	AO1008_01797	Contig105:50244-51065	1.02533	1.91472	1.45878	0	0.657361	0.765245
Ao3042_00185	AO1008_01798	Contig105:51404-52997	0.213222	0.157903	0	0.0994196	0.270781	0.210744
Ao3042_00186	AO1008_01799	Contig105:53856-55850	0.234371	0.231043	0.5899	0	0	0.0771163
Ao3042_00187	AO1008_01800	Contig105:55969-57692	3.16745	2.40233	2.91322	0.832103	2.57435	3.60814
Ao3042_00188	AO1008_01801	Contig105:58165-61617	10.3629	9.41045	9.89007	12.13	10.7714	13.5203
Ao3042_00189	AO1008_01802	Contig105:62431-64024	1.53712	3.98173	3.62883	2.59678	3.53572	13.477
Ao3042_00190	AO1008_01803	Contig105:64609-65763	0	0	0	0	0	0
Ao3042_00191	AO1008_01804	Contig105:66637-67480	0.225472	0	1.28207	0	0.288535	1.5684
Ao3042_00192	AO1008_01805	Contig105:68491-71260	11.6838	23.6105	21.4952	15.5752	17.4412	30.5553
Ao3042_00193	AO1008_01806	Contig105:71874-73419	2.19654	12.8637	11.7238	1.06815	1.45436	4.52854
Ao3042_00194	AO1008_01807	Contig105:75372-76314	0.159512	0	0	0	0	0.158037
Ao3042_00195	AO1008_01808	Contig105:82432-83555	0.177964	1.32334	0.33687	0.333069	0	0.529399
Ao3042_00196	AO1008_01809	Contig105:85425-86210	0	0	0	0	0	0
Ao3042_00197	AO1008_01810	Contig105:86605-87419	0.878886	0	0	0.206026	0	0
Ao3042_00198	AO1008_01811	Contig105:91258-93168	4.06242	3.92773	4.86667	7.93016	6.93226	9.71666
Ao3042_00199	AO1008_01812	Contig105:95442-96852	1.5428	1.33463	0.486067	1.56028	1.96203	4.07036
Ao3042_00200	AO1008_01813	Contig105:97466-99111	0	0	0.17568	0	0	0
Ao3042_00201	AO1008_01814	Contig105:101380-102499	0	0	0	0	0	0
Ao3042_00202	AO1008_01815	Contig105:103367-106097	0	0	0	0	0	0
Ao3042_00203	AO1008_01816	Contig105:106737-107794	4.30688	1.32297	0.280893	4.44084	6.24069	3.08839
Ao3042_00204	AO1008_01817	Contig105:111136-112000	0	0	1.32391	0	0	0
Ao3042_00205	AO1008_01818	Contig105:113536-114301	0.612315	1.21601	0.77326	0.191238	0.782497	1.21577
Ao3042_00206	AO1008_01819	Contig105:114726-116191	0.416799	0.824632	0.525409	0.259529	1.06083	0.687599
Ao3042_00207	AO1008_01820	Contig105:116849-119572	0	0	0	0	0	0.0564864
Ao3042_00209	AO1008_01822	Contig105:123918-124916	0	0	0	0	0	0
Ao3042_00210	AO1008_01823	Contig105:126295-126751	0	0.600538	0	0.377104	0	1.19797
Ao3042_00211	AO1008_01824	Contig105:128759-129862	0	0	0	0.151394	0	0.641722
Ao3042_00212	AO1008_01825	Contig105:131148-133432	5.30669	5.48921	5.63304	11.2365	8.99054	7.98412
Ao3042_00213	AO1008_01826	Contig105:134171-135149	1.62931	1.93681	1.84971	0.304711	0.207664	1.77594
Ao3042_00214	AO1008_01827	Contig105:136504-137268	1.15559	0	7.01	0	0.887603	0.459453
Ao3042_00215	AO1008_01828	Contig105:137962-140028	0.159526	0.117957	0.752883	0	0	0.0787405
Ao3042_00216	AO1008_01829	Contig105:141204-142483	0	0	0	0	0	0
Ao3042_00217	AO1008_01830	Contig105:144483-146319	0	0	0	0	0	0
Ao3042_00218	AO1008_01831	Contig105:146716-148289	0	0	0	0	0.118037	0
Ao3042_00219	AO1008_01832	Contig105:149634-151403	0	0	0.336777	0	0.226243	0.0880694
Ao3042_00220	AO1008_01833	Contig105:151744-153293	8.25235	11.2222	17.3019	11.5999	11.777	31.0706
Ao3042_00221	AO1008_01834	Contig105:155017-155692	0	0	0.451116	0	0	0
Ao3042_00222	AO1008_01835	Contig105:156394-158425	0.465645	0.114755	0	0	0.295125	0.383026
Ao3042_00223	AO1008_01836	Contig105:159131-159724	10.6758	25.666	36.5539	2.6872	4.59256	5.6918
Ao3042_00224	AO1008_01837	Contig105:160577-162167	3.53618	0.990251	2.888	1.78157	1.69801	2.36037
Ao3042_00226	AO1008_01839	Contig105:164063-165522	0.313225	1.6284	1.48139	0.146402	0.399058	5.43003
Ao3042_00227	AO1008_01840	Contig105:167692-169469	3.34249	12.6602	6.9259	24.6023	33.8006	22.9384
Ao3042_00228	AO1008_01841	Contig105:171118-177185	3.18376	377.88	94.3929	4.5655	43.1977	116.93
Ao3042_00229	AO1008_01842	Contig105:171118-177185	0	0	0	1.11414	0	0
Ao3042_00230	AO1008_01843	Contig105:171118-177185	39.6872	1594.02	328.347	10.1679	170.889	29.401
Ao3042_00231	AO1008_01844	Contig105:179981-181104	138.036	208.201	88.7854	10.5877	37.6619	6.70301
Ao3042_00232	AO1008_01845	Contig105:181954-183674	5.6685	4.9855	0.852565	1.78074	1.99485	0.160832
Ao3042_00233	AO1008_01846	Contig105:181954-183674	311.572	226.571	150.829	936.588	832.556	560.719
Ao3042_00234	AO1008_01847	Contig105:186451-189655	1.54543	2.03222	5.51169	1.35976	2.1778	1.18692
Ao3042_00235	AO1008_01848	Contig105:190633-191859	3.29278	10.3541	16.185	1.22976	1.67536	2.73691
Ao3042_00236	AO1008_01849	Contig105:194059-197441	141.443	140.484	144.105	165.764	94.5072	108.722
Ao3042_00237	AO1008_01850	Contig105:197815-201194	7.50443	3.79448	4.26614	2.34248	3.05715	5.52372
Ao3042_00239	AO1008_01852	Contig105:205896-207038	3.32618	4.17364	4.35287	2.62732	1.78956	4.55636
Ao3042_00240	AO1008_01853	Contig105:207523-207975	67.5465	72.94	115.611	80.588	111.611	150.393
Ao3042_00241	AO1008_01854	Contig105:208310-209832	76.8761	46.1356	43.6606	71.3893	62.5667	43.5675
Ao3042_00242	AO1008_01855	Contig105:211634-213933	19.6591	9.31513	11.7228	35.8994	32.6012	24.2463
Ao3042_00243	AO1008_01856	Contig105:215643-217496	3.36377	3.2617	1.16544	4.61179	2.40774	3.12226
Ao3042_00244	AO1008_01857	Contig105:217869-219263	0.428565	0	0.60724	0	0.272137	0.211797
Ao3042_00245	AO1008_01858	Contig105:219845-221345	0.0944547	0.279602	1.96222	0.0880318	0.239719	0
Ao3042_00246	AO1008_01859	Contig105:222448-226763	98.4448	112.819	109.493	48.29	84.3579	162.998
Ao3042_00247	AO1008_01860	Contig105:222448-226763	1.58064	2.5236	3.0656	1.09733	1.43355	4.16399
Ao3042_00248	AO1008_01861	Contig105:227114-227642	0	0	0	0	0	0.651323
Ao3042_00249	AO1008_01862	Contig105:227769-228369	0	0	0	0	0	0
Ao3042_00250	AO1008_01863	Contig105:232249-233889	71.001	137.21	179.156	59.4079	97.442	134.149
Ao3042_00251	AO1008_01864	Contig105:234212-235301	12.2698	21.1863	44.7065	7.45196	15.4087	18.4214
Ao3042_00252	AO1008_01865	Contig105:235481-238086	6.09579	10.0225	13.0196	11.2888	16.8902	13.441
Ao3042_00254	AO1008_01867	Contig105:239766-241027	2.63229	0.678345	1.0813	20.4995	28.7923	1.69737
Ao3042_00255	AO1008_01868	Contig105:241534-242345	0.75995	0.378373	1.44151	0.237916	0	0.252047
Ao3042_00256	AO1008_01869	Contig105:243029-250306	70.5649	35.1787	72.9442	101.775	126.89	59.2381
Ao3042_00257	AO1008_01870	Contig105:243029-250306	60.6149	46.4764	25.9711	4.96666	13.9223	17.08
Ao3042_00258	AO1008_01871	Contig105:254028-254400	0	0	0	0	0	1.08494
Ao3042_00259	AO1008_01872	Contig105:256152-256925	0	0	0	0	0	0
Ao3042_00260	AO1008_01873	Contig105:257982-259419	0.198028	0.146588	0.187018	0	0.125682	0
Ao3042_00261	AO1008_01874	Contig105:259949-260735	0	0	0	0	0	0
Ao3042_00262	AO1008_01875	Contig105:261458-262941	0.489445	0.144913	0.184887	0.547486	0.24849	0.483567
Ao3042_00265	AO1008_09631	Contig106:722-2203	6.2259	5.44065	6.7478	12.7512	11.0142	13.7166
Ao3042_00266	AO1008_01513	Contig106:4209-6388	11.4522	8.90162	6.99561	31.9768	21.2143	14.7599
Ao3042_00267	AO1008_01512	Contig106:6588-9791	0.209082	0.309638	0	0.292439	0.398233	0.103317
Ao3042_00269	AO1008_01510	Contig106:16675-17467	0	0	0	1.83342	0.25003	0
Ao3042_00270	AO1008_01509	Contig106:17864-19949	0.463147	0.684388	0.249715	1.47794	0.586654	0.652756
Ao3042_00271	AO1008_01508	Contig106:20246-21112	8.09859	21.5804	21.7532	2.8213	10.3389	14.3868
Ao3042_00272	AO1008_01507	Contig106:21521-22434	26.5426	23.5336	39.9174	45.8786	52.5949	89.2839
Ao3042_00273	AO1008_01506	Contig106:22586-23953	26.7841	11.6209	2.76706	22.2434	27.7662	17.8883
Ao3042_00274	#N/A	Contig106:24837-25504	192.259	141.499	168.186	211.981	240.418	239.842
Ao3042_00275	#N/A	Contig106:25789-28382	20.6576	27.7474	36.0687	19.4717	25.5217	21.1825
Ao3042_00276	AO1008_11995	Contig106:30821-31781	749.291	1163.26	1632.53	39.168	270.103	989.578
Ao3042_00277	AO1008_11994	Contig106:33743-36034	14.3575	30.2394	25.1956	7.61849	11.8983	40.3779
Ao3042_00278	AO1008_11993	Contig106:39463-42120	1.7253	3.51516	3.81645	0.94102	1.95847	2.22971
Ao3042_00279	AO1008_11992	Contig106:42477-44918	208.129	123.037	113.794	181.73	215.898	106.93
Ao3042_00280	AO1008_11991	Contig106:45661-47750	123.987	121.8	109.723	113.053	103.068	160.151
Ao3042_00281	AO1008_11990	Contig106:49345-51973	110.889	57.2645	41.1767	138.13	178.293	163.192
Ao3042_00282	AO1008_11989	Contig106:52257-53651	785.163	412.87	413.895	733.436	1341.08	1428.89
Ao3042_00283	AO1008_11988	Contig106:53772-55247	548.503	518.597	485.858	1273.28	1318.74	2063.44
Ao3042_00284	AO1008_11987	Contig106:55318-56936	76.5348	38.6419	33.7849	69.464	61.0995	51.137
Ao3042_00285	AO1008_11986	Contig106:58443-59479	102.964	113.078	131.736	211.529	151.277	184.375
Ao3042_00286	AO1008_11985	Contig106:59750-60587	35.1376	48.9634	55.1409	44.9353	50.5009	81.2664
Ao3042_00287	AO1008_11984	Contig106:60897-62388	11.416	14.0609	17.1747	13.8455	17.3142	20.6643
Ao3042_00289	AO1008_11982	Contig106:64772-66578	9.97712	10.0771	11.6382	25.1583	18.2034	12.1721
Ao3042_00290	AO1008_11981	Contig106:66878-68784	18.0109	12.7088	18.0937	13.2366	17.5998	18.5164
Ao3042_00291	AO1008_11980	Contig106:69065-71036	5.28218	2.798	4.61365	15.7858	13.4923	14.8645
Ao3042_00292	AO1008_11979	Contig106:71931-73716	16.7269	22.8863	43.8968	3.27209	10.0753	11.6434
Ao3042_00293	AO1008_11978	Contig106:73858-77851	7.7452	8.6181	15.2435	4.60893	11.8087	19.6777
Ao3042_00294	AO1008_11977	Contig106:79201-81005	3.24587	5.25653	3.79299	3.31051	3.42864	4.88213
Ao3042_00295	AO1008_11976	Contig106:81936-82712	1.14072	1.28026	0	1.07304	0.732713	2.27331
Ao3042_00296	AO1008_11975	Contig106:82972-84591	2.23743	2.48617	2.32515	0.939168	1.13695	4.31332
Ao3042_00297	AO1008_11974	Contig106:84679-85688	0	0.882395	0	0	0	0.196064
Ao3042_00298	AO1008_11973	Contig106:86672-90603	0.611595	2.70776	0.906263	0.284306	0.221022	0.129165
Ao3042_00299	AO1008_11972	Contig106:90846-95183	20.083	18.5976	18.1251	20.0081	21.3481	22.735
Ao3042_00300	AO1008_11971	Contig106:96335-99097	110.637	47.4703	85.4834	55.192	127.892	94.1492
Ao3042_00301	AO1008_11970	Contig106:113099-116177	21.8153	20.6902	22.3235	23.1333	23.8399	19.3529
Ao3042_00302	AO1008_11969	Contig106:116473-121245	15.6407	12.1306	11.1334	18.9071	21.7175	13.1252
Ao3042_00303	AO1008_11968	Contig106:116473-121245	13.4005	11.7822	15.3526	16.022	14.6626	11.6035
Ao3042_00304	AO1008_11967	Contig106:125224-128499	140.106	108.459	103.787	165.151	135.8	137.097
Ao3042_00305	AO1008_11966	Contig106:132290-138572	122.848	127.533	164.123	51.8835	72.8026	92.9189
Ao3042_00306	AO1008_11965	Contig106:132290-138572	258.377	236.963	272.194	214.334	284.311	230.613
Ao3042_00307	AO1008_11964	Contig106:139007-140817	4.26261	6.55236	9.1524	1.55712	3.70954	4.29121
Ao3042_00308	AO1008_11963	Contig106:142425-144404	2.93835	2.68847	2.50869	1.95379	3.81146	2.62327
Ao3042_00309	AO1008_11962	Contig106:144447-146768	17.7063	11.2244	13.1509	13.7894	19.0041	16.2272
Ao3042_00310	AO1008_11613	Contig106:146906-149484	52.3018	56.3021	50.9674	56.8588	51.862	32.2553
Ao3042_00311	AO1008_11612	Contig106:150886-155471	7.28227	6.45134	11.0191	5.71777	7.33572	5.35044
Ao3042_00312	AO1008_11611	Contig106:150886-155471	106.23	103.097	101.838	255.08	148.03	139.699
Ao3042_00313	AO1008_11610	Contig106:156695-158549	74.0264	60.6112	66.1355	75.8793	59.085	56.1203
Ao3042_00314	AO1008_11609	Contig106:158577-160703	21.2813	13.0541	11.6815	22.5941	61.8543	9.47002
Ao3042_00315	AO1008_11608	Contig106:162975-165412	96.8965	91.5329	59.337	171.318	114.267	110.746
Ao3042_00316	AO1008_11607	Contig106:165650-167211	460.992	552.9	576.601	253.63	359.963	372.813
Ao3042_00317	AO1008_11606	Contig106:167255-168566	367.281	333.072	452.345	840.86	369.712	520.752
Ao3042_00318	AO1008_11605	Contig106:169758-170442	0.778257	0	0.984319	0	0.665412	0.25819
Ao3042_00319	AO1008_11604	Contig106:170925-172154	130.193	148.51	167.409	249.271	231.264	223.623
Ao3042_00320	AO1008_11603	Contig106:172564-177077	7.87551	3.95806	5.06018	8.19398	7.26857	5.43275
Ao3042_00321	AO1008_11602	Contig106:177339-179606	0.610592	0.451396	2.59328	0.497503	0.19348	0.979341
Ao3042_00322	AO1008_11601	Contig106:180107-181238	46.3422	35.0951	37.4451	73.5769	69.9752	89.3702
Ao3042_00323	AO1008_11600	Contig106:181284-183577	176.628	157.346	190.537	221.19	174.982	161.526
Ao3042_00324	AO1008_11599	Contig106:183658-184913	163.681	114.409	126.558	224.135	167.247	178.764
Ao3042_00325	AO1008_11598	Contig106:185410-187611	1.34412	1.85627	2.70732	0.834951	1.25041	3.62844
Ao3042_00326	AO1008_11597	Contig106:187976-190998	13.301	8.50781	15.6136	10.8289	15.2506	20.3562
Ao3042_00328	AO1008_11595	Contig106:187976-190998	10.021	18.6305	15.7213	8.6106	14.0974	9.755
Ao3042_00329	AO1008_11594	Contig106:192015-193178	1.96908	3.5583	2.99966	1.48967	1.019	3.5493
Ao3042_00330	AO1008_11593	Contig106:204687-208440	258.594	204.926	208.248	97.773	182.831	208.352
Ao3042_00332	AO1008_11591	Contig106:209065-213041	0.0353937	5.37754	17.6847	0	0	0.627661
Ao3042_00333	AO1008_11590	Contig106:214076-215402	49.786	69.9552	96.9653	48.4595	73.2055	65.1467
Ao3042_00334	AO1008_11589	Contig106:217129-218350	2695.36	7193.54	2371.85	4001.33	4479.7	2230.25
Ao3042_00335	AO1008_11588	Contig106:218685-221438	6.52005	5.53332	7.45684	9.21546	6.82163	6.32697
Ao3042_00336	AO1008_11587	Contig106:221547-223245	86.5839	68.2562	66.6542	154.51	121.966	107.63
Ao3042_00337	AO1008_11586	Contig106:223934-226148	110.64	265.25	203.595	183.767	213.945	290.838
Ao3042_00338	AO1008_11585	Contig106:227523-228973	0.502273	1.48947	4.74692	1.52367	3.5125	8.07402
Ao3042_00339	AO1008_11584	Contig106:229243-230117	8.6127	12.8703	20.7969	12.506	9.03841	10.1312
Ao3042_00340	AO1008_11583	Contig106:230614-232378	248.082	32.7145	63.2938	198.431	499.234	149.444
Ao3042_00341	AO1008_11582	Contig106:233308-234868	15.1112	9.3728	6.83482	24.0304	16.9896	10.5456
Ao3042_00342	AO1008_11581	Contig106:235121-237384	10.5304	7.96651	14.9625	18.2414	18.6384	19.2735
Ao3042_00343	AO1008_11580	Contig106:237622-238765	29.0114	37.7149	28.9903	29.349	42.5815	28.1961
Ao3042_00344	AO1008_11579	Contig106:239173-241432	38.8203	22.2566	13.526	2.71337	7.61564	10.6061
Ao3042_00345	AO1008_11578	Contig106:245022-246267	22.9863	18.2362	24.351	27.2945	26.8489	22.155
Ao3042_00346	AO1008_11577	Contig106:246463-248344	12.1164	2.29364	4.46237	19.3295	17.9766	6.56226
Ao3042_00347	AO1008_11576	Contig106:248586-249640	26.4245	14.2116	14.4164	78.3694	39.4626	43.2104
Ao3042_00348	AO1008_11575	Contig106:250293-252444	41.2346	25.9044	35.6381	44.3728	40.3928	54.0406
Ao3042_00349	AO1008_11574	Contig106:257182-260198	100.276	72.0144	53.0685	60.1564	89.0967	45.1777
Ao3042_00350	AO1008_11573	Contig106:262978-265014	198.693	210.073	257.008	185.179	193.91	262.248
Ao3042_00351	AO1008_11572	Contig106:265021-267570	32.346	21.4988	37.7895	35.5872	42.8814	32.273
Ao3042_00352	AO1008_11571	Contig106:267661-271616	147.422	141.246	131.059	190.589	179.605	161.287
Ao3042_00353	AO1008_11570	Contig106:267661-271616	3.11984	2.17432	4.55667	7.36273	7.24321	6.44683
Ao3042_00354	AO1008_11569	Contig106:275626-281390	31.4137	39.4778	29.0043	27.5971	31.621	31.7006
Ao3042_00355	AO1008_11568	Contig106:281623-288908	3.17218	3.19853	2.4473	2.4978	2.27236	3.10461
Ao3042_00356	AO1008_05347	Contig108:576-1633	30.3114	21.9718	30.6391	19.701	18.1324	33.5991
Ao3042_00357	AO1008_05346	Contig108:3059-5051	62.8258	43.0065	65.1423	67.2517	56.474	55.1004
Ao3042_00358	AO1008_05345	Contig108:7783-8695	33.6911	28.378	51.4137	87.0772	69.1721	63.0117
Ao3042_00359	AO1008_05344	Contig108:9702-11088	2.08271	8.51234	10.6644	1.99885	1.8321	4.22941
Ao3042_00360	AO1008_05343	Contig108:15641-19897	33.8358	22.7288	35.094	28.9646	42.3237	37.859
Ao3042_00361	AO1008_05342	Contig108:20662-25251	74.7401	51.9585	64.7956	50.2599	75.042	112.585
Ao3042_00362	AO1008_05341	Contig108:20662-25251	166.69	133.814	111.463	329.848	215.545	233.746
Ao3042_00363	AO1008_05340	Contig108:25389-27944	22.1457	11.9212	22.6382	33.1834	29.4113	33.4008
Ao3042_00364	AO1008_08474	Contig109:719-2798	74.1021	63.3866	73.5964	33.0577	41.2707	33.7606
Ao3042_00365	AO1008_08475	Contig109:3299-5095	8.38664	9.41559	6.88958	3.54343	20.0806	116.663
Ao3042_00366	AO1008_08476	Contig109:6416-8684	13.0671	21.0901	19.2902	15.4234	18.6905	20.8242
Ao3042_00367	AO1008_08477	Contig109:8824-9988	20.2423	37.0425	27.5825	28.7175	34.2745	50.5942
Ao3042_00368	AO1008_08478	Contig109:15195-22985	0.17019	0.100313	0.320731	0.221236	0.171919	0.150779
Ao3042_00369	AO1008_08479	Contig109:23677-25498	0	0	0.174546	0	0	0
Ao3042_00370	AO1008_08480	Contig109:27915-29280	0	0.310396	0.593906	0	0	0.103569
Ao3042_00371	AO1008_08481	Contig109:30258-32160	0.146008	0.431678	1.5157	0.135939	0.277537	0.576369
Ao3042_00372	AO1008_08482	Contig109:32787-33744	0	0	0	0	0	0.219416
Ao3042_00373	AO1008_08483	Contig109:35203-36693	0.297042	0.293175	0.561053	0.184603	0.502727	0.48915
Ao3042_00374	AO1008_08484	Contig109:37085-43440	0.682373	1.54007	2.2909	0.435692	0.700271	0.776827
Ao3042_00375	AO1008_08485	Contig109:44183-49791	0.585055	2.19211	1.42444	0.249073	0.43114	0.960187
Ao3042_00376	AO1008_08486	Contig109:49918-58142	103.504	24.9229	52.8592	10.097	18.0062	20.0628
Ao3042_00377	AO1008_08487	Contig109:60273-62476	2.90264	2.21726	2.65243	3.66504	2.49503	1.0174
Ao3042_00378	AO1008_08488	Contig109:62564-63693	0.289054	1.07264	0.819972	1.35025	0.551966	0.429279
Ao3042_00379	AO1008_08489	Contig109:65682-67297	23.3511	27.5861	29.7779	83.6126	44.9792	30.373
Ao3042_00380	AO1008_08490	Contig109:67451-69119	5.72048	4.97752	6.35318	4.62354	4.3739	3.98701
Ao3042_00381	AO1008_08491	Contig109:69742-72052	1.79693	2.41606	3.39243	1.44548	1.657	2.17724
Ao3042_00382	AO1008_08492	Contig109:73609-75238	6.55857	9.1295	9.42924	23.5419	20.5004	19.5361
Ao3042_00383	AO1008_08493	Contig109:75375-76682	5.23811	8.20757	6.87944	3.94238	6.29827	5.76264
Ao3042_00384	AO1008_08494	Contig109:77129-78716	11.7873	16.6324	10.3936	3.7698	10.411	10.8764
Ao3042_00385	AO1008_08495	Contig109:80420-83105	30.8034	24.6444	11.3317	7.28217	19.1243	8.34255
Ao3042_00386	AO1008_08496	Contig109:80420-83105	1.97553	1.47066	0	0.9252	0.504704	0.196064
Ao3042_00387	AO1008_08497	Contig109:86854-89425	6.88749	8.52708	9.8944	13.3547	14.014	8.82827
Ao3042_00388	AO1008_08498	Contig109:89909-91977	26.7794	23.8255	54.7504	4.43009	23.3423	166.245
Ao3042_00390	AO1008_08500	Contig109:92649-94157	30.4098	44.5173	29.8755	48.8535	67.4012	62.9438
Ao3042_00392	AO1008_08502	Contig109:94689-95284	0.711719	1.06942	0.676925	0	0	0
Ao3042_00393	AO1008_08503	Contig109:95922-97326	0.384551	2.66126	1.93846	0.837635	3.74928	7.10182
Ao3042_00394	AO1008_08504	Contig109:97675-98491	1.42648	4.85627	4.24618	5.15521	5.98956	21.8489
Ao3042_00395	AO1008_08505	Contig109:98874-101659	0.64864	0.577191	0.980948	0	0	0.513419
Ao3042_00396	AO1008_08506	Contig109:108725-110537	0.230744	15.4667	57.4945	0	0.877431	1.67021
Ao3042_00397	AO1008_08507	Contig109:111583-113099	1.06201	1.3991	1.11498	8.03743	6.59843	11.3189
Ao3042_00398	AO1008_08508	Contig109:113703-115018	7.08169	13.6308	12.211	12.5235	19.1128	53.4592
Ao3042_00399	AO1008_08509	Contig109:116056-117127	0	0	0	0	0	0
Ao3042_00400	AO1008_08510	Contig109:117506-118090	4.2195	6.32862	4.93507	1.22362	4.59836	3.24001
Ao3042_00401	AO1008_08511	Contig109:118477-119645	6.48543	13.6838	13.437	3.37586	6.50145	5.55173
Ao3042_00402	AO1008_08512	Contig109:119776-120645	2.2535	3.63274	1.77784	1.75814	10.788	33.7193
Ao3042_00403	AO1008_08513	Contig109:121469-122180	0	0	0	0	0	0
Ao3042_00404	AO1008_08514	Contig109:124659-127630	1.86565	1.89997	1.03908	1.19221	0.930813	0.724638
Ao3042_00405	AO1008_08515	Contig109:124659-127630	10.8094	10.2568	6.63741	3.0019	9.17645	10.218
Ao3042_00406	AO1008_08516	Contig109:127909-128543	1.02941	0	1.95285	0.967015	1.65006	3.84164
Ao3042_00407	AO1008_08517	Contig109:128865-129828	1.98725	2.99324	1.51382	0	1.02864	0
Ao3042_00408	AO1008_08518	Contig109:130192-131279	0.463102	0.917055	0.292013	0	0	0.152904
Ao3042_00409	AO1008_08519	Contig109:131818-135142	3.94135	6.38726	6.03726	2.08608	4.73473	7.5805
Ao3042_00410	AO1008_08520	Contig109:131818-135142	24.0878	46.659	36.7135	22.5544	53.6533	52.8734
Ao3042_00411	AO1008_08521	Contig109:135485-137057	0.308384	0.152218	0.194179	0.191686	0.261024	0.304748
Ao3042_00412	AO1008_08522	Contig109:137385-138461	1.77935	3.04615	5.69348	0.766964	2.43823	4.33498
Ao3042_00413	AO1008_08523	Contig109:139296-142731	10.8113	19.52	30.7219	11.2703	21.7669	25.1632
Ao3042_00414	#N/A	Contig109:139296-142731	14.447	20.696	42.6997	17.9195	25.7824	22.3039
Ao3042_00415	AO1008_08525	Contig109:142940-144420	5.44053	8.52198	5.73177	2.04874	5.18124	8.78905
Ao3042_00416	AO1008_08526	Contig109:146008-148141	4.35249	5.23304	14.5546	5.5767	6.55715	8.06028
Ao3042_00417	AO1008_08527	Contig109:151645-153984	6.41961	6.4797	5.63699	6.44736	6.92271	21.3806
Ao3042_00418	AO1008_08528	Contig109:154977-156180	21.8216	12.1459	25.249	8.98598	19.0061	15.7768
Ao3042_00419	AO1008_08529	Contig109:158579-161950	15.9055	32.1019	37.4545	3.87266	12.3463	17.4165
Ao3042_00420	AO1008_08530	Contig109:166040-167518	2.39996	3.69456	2.7196	2.68432	6.94433	31.6757
Ao3042_00421	AO1008_08531	Contig109:168023-169425	0	0	0.211929	0	0	0.443549
Ao3042_00422	AO1008_08532	Contig109:175167-175977	0	0	0	0	0	0
Ao3042_00423	AO1008_08533	Contig109:176409-180111	2.01271	3.92912	2.43179	1.72462	1.93935	2.22541
Ao3042_00424	AO1008_08534	Contig109:181531-182086	0.6108	0	0.580129	2.30049	1.17854	0.304592
Ao3042_00425	AO1008_08535	Contig109:182142-182541	0.483742	0	0	0.918954	0	1.45927
Ao3042_00426	AO1008_08536	Contig109:182964-184030	0.508675	2.01636	0.96265	0.317207	0.432405	1.0084
Ao3042_00427	AO1008_08537	Contig109:184803-185751	24.6099	47.9109	22.9514	7.45172	12.4688	8.25498
Ao3042_00428	AO1008_08538	Contig109:186824-187988	0	0	0	0	0	0
Ao3042_00429	AO1008_08539	Contig109:188865-195467	0.162291	0.508277	0.152937	0	0.0256211	0.059918
Ao3042_00430	AO1008_08540	Contig109:196205-197578	0.34003	0	0	0	0	0.224121
Ao3042_00431	AO1008_08541	Contig109:198792-199299	0	3.10357	12.4462	0	0	1.37672
Ao3042_00432	AO1008_08542	Contig109:201469-206872	0	0	2.72646	0	0	0.362122
Ao3042_00433	AO1008_08543	Contig109:207657-208359	0	2.70427	35.2288	0	0	0.900994
Ao3042_00434	AO1008_08544	Contig109:211501-212720	0.130514	0	0	0	0	0
Ao3042_00435	AO1008_08545	Contig109:215023-216435	5.21103	7.87554	13.461	0	1.7557	1.05111
Ao3042_00436	AO1008_08546	Contig109:216924-217622	0.45652	10.2136	54.9496	0	1.75293	2.94914
Ao3042_00437	AO1008_08547	Contig109:220049-223167	2.46534	3.02099	2.63197	1.25433	2.70693	2.33838
Ao3042_00438	AO1008_08548	Contig109:223172-225320	3.01253	1.60996	1.69329	1.72986	2.5977	2.27628
Ao3042_00439	AO1008_08549	Contig109:225681-227208	0.192713	0.713155	0.181984	0.269437	0.48915	0.38077
Ao3042_00440	AO1008_08550	Contig109:227496-229782	5.47484	5.51474	3.75652	2.83678	4.01802	6.25952
Ao3042_00441	AO1008_08551	Contig109:229875-232636	4.01304	4.74059	2.72533	2.04058	2.37024	5.38138
Ao3042_00442	AO1008_08552	Contig109:232694-233746	8.79259	3.98275	1.97308	3.20298	2.84659	3.39431
Ao3042_00443	AO1008_08553	Contig109:235271-236506	88.4657	37.1321	45.6888	36.7496	58.1394	159.981
Ao3042_00444	AO1008_08554	Contig109:236597-237539	5.29102	4.82079	3.87615	0.798297	0.435292	4.568
Ao3042_00445	AO1008_08555	Contig109:237959-239265	1.29728	4.61753	0.490474	2.42225	1.64992	2.82381
Ao3042_00446	AO1008_08556	Contig109:241150-242765	0.261393	0.128907	0.164519	0	0	0
Ao3042_00447	AO1008_08557	Contig109:243517-246895	9.27096	7.47267	6.77756	3.18912	3.71871	6.31875
Ao3042_00449	AO1008_08559	Contig109:250958-252063	28.6835	25.2133	14.8122	12.7713	9.96659	3.41657
Ao3042_00450	AO1008_08560	Contig109:252210-253958	5.11256	1.34161	2.64657	0.768088	1.77751	1.13979
Ao3042_00451	AO1008_08561	Contig109:254851-255984	0.157184	0.466969	0.892092	0.734702	1.60212	0.155714
Ao3042_00452	AO1008_08562	Contig109:258213-258609	0	0.74086	0.934083	0	0	0.492071
Ao3042_00453	AO1008_08563	Contig109:259198-260092	0	0	0	0	0.216202	0
Ao3042_00454	AO1008_08564	Contig109:260793-262301	0.125568	0.55855	0.712038	0	0.159659	0.248431
Ao3042_00455	AO1008_05708	Contig109:262523-263228	1.35283	3.69865	0.427356	0.211478	0.577071	1.5684
Ao3042_00456	AO1008_02602	Contig109:263509-264418	8.99483	9.43915	9.29388	4.78859	8.09876	13.3948
Ao3042_00457	AO1008_07290	Contig109:265304-266301	484.783	58.0985	58.4141	136.927	365.978	44.2366
Ao3042_00458	AO1008_03629	Contig109:266341-269399	8.41481	8.13845	2.28043	1.97878	4.28314	50.7721
Ao3042_00459	#N/A	Contig109:269832-271875	16.079	10.4801	4.96611	6.26028	5.18658	46.3061
Ao3042_00460	AO1008_08565	Contig109:272064-274192	0	0.197982	0.379241	0	0.0848548	0
Ao3042_00462	AO1008_08567	Contig109:279499-280914	10.2726	7.30666	6.84839	5.72739	12.5294	19.5049
Ao3042_00463	AO1008_08568	Contig109:281024-282161	7.58542	9.15176	7.77707	4.56082	11.6087	11.1935
Ao3042_00464	AO1008_08569	Contig109:282589-285432	1.07863	1.51313	1.93305	1.30432	0.682599	0.957204
Ao3042_00465	AO1008_08570	Contig109:287209-288202	1.92364	1.42897	3.03292	2.84771	1.63424	2.85888
Ao3042_00466	AO1008_08571	Contig109:288529-289625	4.02101	2.58482	4.56132	4.38055	3.75134	3.44866
Ao3042_00467	AO1008_08572	Contig109:289926-291731	0.772364	0.685223	1.31217	1.00694	0.489511	1.29604
Ao3042_00468	AO1008_08573	Contig109:291813-292909	0.690003	1.79523	16.9769	0.806893	0.659988	1.71006
Ao3042_00469	AO1008_08574	Contig109:293412-294392	1.91026	1.54922	3.94419	1.94967	5.75875	8.95254
Ao3042_00470	AO1008_04114	Contig113:1313-2780	4.06534	2.60427	1.24555	1.33223	3.90779	5.97373
Ao3042_00471	AO1008_04115	Contig113:3636-4455	0.645985	0.641852	0.408016	0	0	0.641636
Ao3042_00472	AO1008_04116	Contig113:4636-6591	0	0.416647	0.177215	0	0.119071	1.01963
Ao3042_00473	AO1008_04117	Contig113:8259-9306	0	0	0	0	0	0
Ao3042_00474	AO1008_04118	Contig113:10677-12596	123.154	15.3153	32.9234	4.86548	16.4428	9.20891
Ao3042_00476	AO1008_04120	Contig113:17356-18224	1.88949	3.87681	4.03017	3.54628	7.25893	11.0365
Ao3042_00477	AO1008_04121	Contig113:18249-21111	1.79686	2.19817	1.54947	1.6712	3.57324	6.52943
Ao3042_00478	AO1008_04122	Contig113:23825-25619	36.3501	50.5775	42.3462	12.2174	34.9877	44.9214
Ao3042_00479	AO1008_06265	Contig114:1002-2401	7.12013	11.706	7.09122	7.3548	7.8676	7.45089
Ao3042_00480	AO1008_06266	Contig114:2683-3111	75.2015	42.2234	72.9432	113.177	122.466	100.01
Ao3042_00481	AO1008_06267	Contig114:3877-4867	177.315	178.772	187.274	276.068	199.116	202.466
Ao3042_00482	AO1008_06268	Contig114:5479-6737	509.823	611.092	246.416	26.7399	121.534	268.447
Ao3042_00483	AO1008_06269	Contig114:8563-9893	141.673	152.752	162.746	109.811	128.081	124.178
Ao3042_00485	AO1008_06271	Contig114:12076-14092	11.1797	11.1501	5.04811	1.59608	3.99695	3.99273
Ao3042_00486	AO1008_06272	Contig114:14643-17312	540.1	449.442	487.484	278.917	289.077	313.448
Ao3042_00487	AO1008_06273	Contig114:14643-17312	101.288	126.613	132.496	150.181	102.564	164.568
Ao3042_00488	AO1008_06274	Contig114:17811-21584	114.01	178.469	154.102	304.9	160.791	97.0864
Ao3042_00489	AO1008_06275	Contig114:21934-24889	154.424	180.295	132.171	310.147	226.754	157.613
Ao3042_00490	AO1008_06276	Contig114:25465-26242	1.74922	2.23907	3.31767	3.98916	3.20285	3.72895
Ao3042_00491	AO1008_06277	Contig114:26499-28296	0	0.178833	1.14004	0	0	0.119318
Ao3042_00492	AO1008_06278	Contig114:28581-29971	1.02713	1.21677	1.35817	4.69257	1.43449	0.710511
Ao3042_00493	AO1008_06279	Contig114:31516-32605	6.80014	4.40739	11.8807	3.09957	9.11828	7.95187
Ao3042_00494	AO1008_06280	Contig114:32974-33834	88.9153	83.4032	76.9303	122.728	155.999	143.598
Ao3042_00495	AO1008_06281	Contig114:36362-38567	58.8434	101.76	183.719	23.3182	82.7263	116.271
Ao3042_00496	AO1008_06282	Contig114:38622-40808	11.9188	6.15914	9.21775	14.184	20.2932	14.9709
Ao3042_00497	AO1008_06283	Contig114:41065-43226	35.6056	29.0243	19.2149	40.7199	57.7469	25.9887
Ao3042_00498	AO1008_06284	Contig114:43432-44956	30.5573	32.4536	39.9413	37.3443	40.9985	33.9268
Ao3042_00499	AO1008_06285	Contig114:44967-48203	190.981	229.802	327.214	84.9033	100.726	312.073
Ao3042_00500	AO1008_06286	Contig114:48263-50819	0	0	0	0	0	0
Ao3042_00501	AO1008_06287	Contig114:48263-50819	59.607	48.1655	43.5535	100.101	75.4739	97.8464
Ao3042_00502	AO1008_06288	Contig114:50838-55465	17.3716	18.1725	13.4716	21.0104	16.3765	16.3922
Ao3042_00503	AO1008_06289	Contig114:55849-58843	47.5316	46.8711	38.1113	30.7794	39.8685	49.7956
Ao3042_00504	AO1008_06290	Contig114:59071-64472	8.76012	4.01245	5.06782	13.2354	9.23085	5.62875
Ao3042_00505	AO1008_06291	Contig114:59071-64472	4.43786	4.55357	2.90244	6.9661	5.59591	5.72567
Ao3042_00506	AO1008_06292	Contig114:64518-67181	0	0	0	0	0	0
Ao3042_00507	AO1008_06293	Contig114:64518-67181	35.9331	39.3796	59.0978	36.6116	52.1886	34.4272
Ao3042_00508	AO1008_06294	Contig114:67380-69179	25.0055	74.0637	65.0259	6.14621	17.5365	26.7807
Ao3042_00509	AO1008_06295	Contig114:69685-71297	8.42113	15.275	21.7158	15.1034	10.7983	11.6262
Ao3042_00510	AO1008_06296	Contig114:71528-74221	8.70732	6.72765	7.16548	11.1538	18.6005	7.87535
Ao3042_00511	AO1008_06297	Contig114:71528-74221	168.575	139.03	146.542	191.081	169.708	127.71
Ao3042_00512	AO1008_06298	Contig114:74479-76514	4.75381	7.55937	12.9147	7.91272	10.4959	16.9169
Ao3042_00513	AO1008_06299	Contig114:77275-78208	29.4528	52.9106	81.0664	92.3202	150.229	155.695
Ao3042_00514	AO1008_06300	Contig114:78238-78708	0.717358	0	1.37833	0	0	0
Ao3042_00515	AO1008_06301	Contig114:78800-79594	0.426294	0	0.812491	0	0	0
Ao3042_00516	AO1008_06302	Contig114:80111-80707	1.67766	7.55354	20.4128	0.632797	2.16225	1.00532
Ao3042_00517	AO1008_06303	Contig114:82295-84988	31.851	28.971	10.3838	10.459	12.0827	15.1289
Ao3042_00518	AO1008_06304	Contig114:86027-86780	0	0	0	0	0	0
Ao3042_00519	AO1008_06305	Contig114:88921-91081	0.33065	0.586317	0.873555	1.41563	1.67529	2.0225
Ao3042_00520	#N/A	Contig114:91642-94626	0	0	0.0966115	0	0	0.201981
Ao3042_00521	AO1008_01077	Contig114:95908-96516	0	0	0	0	0	0
Ao3042_00522	AO1008_01078	Contig114:97965-98418	0	1.04649	0	0	1.80173	0
Ao3042_00523	AO1008_01079	Contig114:99225-99909	0.234048	0	0.887431	0	0.299675	0
Ao3042_00524	AO1008_01080	Contig114:100617-102513	1.25452	1.48452	2.52644	0.0779068	0.212112	0.660616
Ao3042_00525	AO1008_01081	Contig114:102561-104878	109.532	92.6025	63.5777	81.6936	113.793	95.8921
Ao3042_00526	AO1008_01082	Contig114:104964-107809	14.7654	12.3742	17.8776	23.7844	14.5227	18.311
Ao3042_00527	AO1008_01083	Contig114:107934-108867	14.4411	9.45776	18.2311	12.9823	14.2611	30.9508
Ao3042_00528	AO1008_01084	Contig114:109568-111213	120.99	83.9447	90.2652	134.512	173.596	93.7977
Ao3042_00529	AO1008_01085	Contig114:111224-113134	16.2005	17.3071	23.4116	21.7275	19.7495	25.7848
Ao3042_00531	AO1008_02642	Contig115:1898-2618	0.219722	0.655114	0.832782	0	1.12429	5.67544
Ao3042_00532	AO1008_02643	Contig115:5242-6663	6.87745	5.09245	3.93696	3.2064	6.21872	7.82661
Ao3042_00533	AO1008_02644	Contig115:10117-11846	0	2.18857	20.771	0.0861345	0.351817	3.83441
Ao3042_00534	AO1008_02645	Contig115:13462-15169	0.950112	2.93897	1.30469	0.241407	4.92968	32.8374
Ao3042_00535	AO1008_02646	Contig115:16538-17753	0	0	3.50147	0	0	0
Ao3042_00536	AO1008_02647	Contig115:19101-21068	0.0802086	0	0.15142	0	0.101689	0.079182
Ao3042_00537	AO1008_02648	Contig115:25335-26477	0	0.226804	0	0.428225	0.194528	0.151267
Ao3042_00538	AO1008_02649	Contig115:27148-28811	0.613838	0.605961	0.579761	0.381543	0.259776	1.01098
Ao3042_00539	AO1008_02650	Contig115:28824-29882	0.763628	2.26804	0.866682	1.85564	0.972642	0.302533
Ao3042_00540	AO1008_02651	Contig115:33333-33789	0.398676	0.600538	1.51854	0	0	0
Ao3042_00541	AO1008_02652	Contig115:33909-37153	0	0.433894	0.138497	0.136636	0.0929873	0
Ao3042_00542	AO1008_02653	Contig115:37582-38166	2.59661	1.94727	0.616883	1.22362	0.418033	3.24001
Ao3042_00543	AO1008_02654	Contig115:38628-39532	0	0	0	0	0	0
Ao3042_00544	AO1008_02655	Contig115:40421-42907	0.456588	0.405401	0	0.255286	0	0
Ao3042_00545	AO1008_02656	Contig115:43827-44335	0	0	0	0.391895	0	0.829931
Ao3042_00546	AO1008_02657	Contig115:44589-45008	0	0.83886	1.0556	0	0	0.556724
Ao3042_00547	AO1008_02658	Contig115:45105-47148	0.0859715	1.39902	2.11022	0	0	0.679146
Ao3042_00548	AO1008_02659	Contig115:47700-49850	0.666067	1.53173	0.698445	0.206721	0.28137	1.09559
Ao3042_00549	AO1008_02660	Contig115:50534-51692	12.2863	14.0208	15.316	4.41279	11.5088	19.2408
Ao3042_00550	AO1008_02661	Contig115:52525-53356	0.184837	1.09999	0.699891	0	0	0.733354
Ao3042_00551	AO1008_02662	Contig115:54656-55941	1.2448	0.184558	0.941126	1.27802	0.633056	0.985062
Ao3042_00552	AO1008_02663	Contig115:59042-60011	0	0	0.345476	0	0	0
Ao3042_00553	AO1008_02664	Contig115:60165-62229	3.0959	6.6472	7.93042	1.23535	3.17606	3.34636
Ao3042_00554	AO1008_02665	Contig115:64117-65221	1.59517	2.56338	1.25657	1.24122	0.507301	1.18388
Ao3042_00555	AO1008_02666	Contig115:67158-70333	9.53119	14.5412	10.6302	4.94242	11.9413	8.4461
Ao3042_00556	AO1008_02667	Contig115:67158-70333	0.729506	0	0	0	0.964839	0
Ao3042_00557	AO1008_02668	Contig115:70712-72988	150.994	318.581	268.646	105.656	198.871	172.574
Ao3042_00558	AO1008_02669	Contig115:74482-76782	88.2718	32.2232	9.22139	187.776	231.377	20.516
Ao3042_00559	AO1008_02670	Contig115:76956-80305	20.4323	20.62	13.7729	36.0277	46.2902	86.0779
Ao3042_00560	AO1008_02671	Contig115:80776-82707	0	0	0.181172	0	0	0.189533
Ao3042_00561	AO1008_02672	Contig115:83675-84079	0	0	1.12904	0	0	0
Ao3042_00562	AO1008_02673	Contig115:85240-89026	0	1.70314	19.0999	0.459675	0.521458	0.0812054
Ao3042_00563	AO1008_02674	Contig115:93157-95680	23.5061	13.5831	10.0362	64.7153	53.7254	127.156
Ao3042_00564	AO1008_02675	Contig115:96755-98092	6.76241	2.68501	2.28223	9.24049	13.8145	29.8576
Ao3042_00565	AO1008_02676	Contig115:98608-99064	0	0	0	0	0	0
Ao3042_00566	AO1008_02677	Contig115:99716-100302	1.99187	1.2774	1.62065	0.80298	1.46214	1.98471
Ao3042_00567	AO1008_02678	Contig115:103060-104499	1.20983	0.717353	0.914605	0.451605	1.53785	0.957243
Ao3042_00568	AO1008_02679	Contig115:105834-107137	1.83017	1.9896	0.691802	2.50506	1.24081	1.0861
Ao3042_00569	AO1008_02680	Contig115:108308-108976	10.5583	92.1454	91.4456	0.877415	4.39545	5.2664
Ao3042_00570	AO1008_02681	Contig115:111515-113942	3.71458	6.47688	3.79162	0.679946	2.62166	13.6943
Ao3042_00571	AO1008_02682	Contig115:114309-117242	0.241986	0.214331	0.182571	0	0.122467	0.0477091
Ao3042_00572	AO1008_02683	Contig115:117587-118133	0	0	0	0	0.401555	0
Ao3042_00573	AO1008_02684	Contig115:118822-119988	2.2493	3.70554	3.54292	10.6138	3.01874	0.988893
Ao3042_00574	AO1008_02685	Contig115:120184-121591	10.033	4.35163	2.48859	19.7471	14.7957	9.11293
Ao3042_00575	AO1008_02686	Contig115:126354-127611	0.114854	0.170193	0.217031	0.2143	1.6053	1.36275
Ao3042_00576	AO1008_02687	Contig115:127878-129276	1.2825	3.32424	0.807638	0.996676	2.71457	3.48595
Ao3042_00577	AO1008_02688	Contig115:129512-130825	0	0	0	0	0	0
Ao3042_00578	AO1008_02689	Contig115:133940-135506	0.270324	1.20001	0.85077	0.0839629	1.25743	2.31385
Ao3042_00579	AO1008_02690	Contig115:136641-138590	0	0	0	0.0896109	0.122013	0
Ao3042_00580	AO1008_02691	Contig115:140293-142341	0.0811148	0.479861	0.153134	0.0755504	0	0.320319
Ao3042_00581	AO1008_02692	Contig115:145785-147102	0	0	0	0.434501	0	0
Ao3042_00582	AO1008_02693	Contig115:149359-152436	10.1788	21.6932	9.12532	3.35285	5.7164	6.47862
Ao3042_00583	AO1008_02694	Contig115:152575-155060	10.3873	15.8636	11.6314	4.96351	12.1948	5.3296
Ao3042_00584	AO1008_02695	Contig115:155933-158307	3.78958	2.84516	2.6961	1.15619	3.46151	3.12523
Ao3042_00585	AO1008_02696	Contig115:158846-160395	11.8328	8.54671	9.65394	27.6148	17.418	9.72522
Ao3042_00586	AO1008_02697	Contig115:161524-163001	7.83088	7.30404	5.96857	4.1264	4.65749	2.49897
Ao3042_00587	AO1008_02698	Contig115:163263-165743	5.31937	5.82692	6.65335	23.2454	13.4703	10.375
Ao3042_00588	AO1008_02699	Contig115:167615-168396	0	0	0	0	0	0.460018
Ao3042_00589	AO1008_02700	Contig115:169759-170945	20.1888	18.1697	12.4688	38.5848	17.6369	18.3812
Ao3042_00590	AO1008_02701	Contig115:172827-174619	2.08378	4.49018	2.63349	0.8689	2.66765	11.277
Ao3042_00591	AO1008_02702	Contig115:174669-175822	1.89189	2.02046	2.5645	0.508096	3.1218	1.34562
Ao3042_00592	AO1008_02703	Contig115:177315-179262	1.91203	3.72497	1.52068	4.40946	3.70476	8.8499
Ao3042_00593	AO1008_02704	Contig115:180589-183520	1.9665	2.82709	2.53809	0.721979	1.83372	2.55111
Ao3042_00594	AO1008_02705	Contig115:184199-185705	2.04128	1.36016	5.20545	1.99833	2.59157	2.31972
Ao3042_00595	AO1008_02706	Contig115:186178-187367	12.6544	14.6219	13.0953	3.23387	8.4726	5.9317
Ao3042_00596	AO1008_02707	Contig115:188357-189387	1.06908	0.907215	2.02226	1.57016	0.778114	2.57153
Ao3042_00597	AO1008_02708	Contig115:192173-194733	7.77452	1.98085	1.13831	3.43099	3.39596	3.10785
Ao3042_00598	AO1008_02709	Contig115:199587-201841	83.4384	38.5165	30.6502	84.4219	49.358	42.2562
Ao3042_00599	AO1008_11787	Contig119:464-3081	10.452	29.5594	29.4273	4.93322	11.7137	112.536
Ao3042_00600	AO1008_11786	Contig119:5041-7004	19.4607	9.02541	6.07154	14.3632	23.8395	33.7866
Ao3042_00601	AO1008_11785	Contig119:7074-9191	41.0204	28.626	21.8017	53.9604	38.7359	35.083
Ao3042_00602	AO1008_11784	Contig119:9371-10589	78.9397	51.288	55.8977	117.381	84.204	81.0257
Ao3042_00603	AO1008_11783	Contig119:10721-12108	37.6504	31.6854	20.8247	69.7213	39.6437	36.3542
Ao3042_00604	AO1008_11782	Contig119:12247-12909	27.1973	27.1297	23.1267	38.9046	41.121	37.542
Ao3042_00605	AO1008_11781	Contig119:12973-14570	35.8925	27.0298	167.757	4.78069	7.81197	10.8433
Ao3042_00606	AO1008_11780	Contig119:14642-16327	87.6085	115.059	112.996	61.518	58.7547	105.534
Ao3042_00607	AO1008_11779	Contig119:28136-29992	45.3458	23.1595	50.5066	14.0974	47.8762	54.7414
Ao3042_00608	AO1008_11778	Contig119:30195-31625	11.5622	11.6604	11.9391	13.0134	11.5138	9.90192
Ao3042_00609	AO1008_11777	Contig119:31857-33897	61.3335	63.2313	94.2505	49.6526	58.0145	67.7651
Ao3042_00610	AO1008_11776	Contig119:34803-38125	26.037	18.7612	22.8751	47.7818	39.7327	30.7984
Ao3042_00611	AO1008_11775	Contig119:34803-38125	0	1.70151	3.1001	0	0	0
Ao3042_00612	AO1008_11774	Contig119:44575-45452	0.354465	0.263568	0	0.165843	0.226099	0.175735
Ao3042_00613	AO1008_11773	Contig119:47237-48262	78.9482	87.828	150.05	140.391	157.388	113.427
Ao3042_00614	AO1008_11772	Contig119:48309-52341	7.02141	5.75405	5.14847	11.1063	11.7455	6.74286
Ao3042_00615	AO1008_11771	Contig119:53012-54183	114.388	86.3114	128.134	245.288	163.676	190.587
Ao3042_00616	AO1008_11770	Contig119:54275-57243	25.3572	71.2801	112.499	4.62229	19.5734	100.247
Ao3042_00617	AO1008_11769	Contig119:59411-62703	56.8878	62.4237	58.9375	45.462	52.2521	54.2557
Ao3042_00618	AO1008_01500	Contig119:68597-78076	10.0229	9.26142	7.80602	7.69173	8.4481	11.9752
Ao3042_00619	#N/A	Contig119:78482-80464	11.7013	15.4926	18.5622	13.3665	14.0084	19.1272
Ao3042_00620	#N/A	Contig119:80970-81618	0	1.12173	1.42463	0	0	0.498167
Ao3042_00621	#N/A	Contig119:82351-86227	11.1103	7.85815	13.3487	10.8463	12.7602	15.0201
Ao3042_00622	#N/A	Contig119:88034-92208	12.8275	10.3804	11.4376	20.8354	20.5585	15.5165
Ao3042_00623	#N/A	Contig119:88034-92208	25.2957	21.9318	45.846	30.9377	44.2839	40.5067
Ao3042_00624	#N/A	Contig119:92509-96371	7.76028	8.22729	11.1044	7.50152	11.6055	9.82955
Ao3042_00625	AO1008_09013	Contig119:96390-98692	300.316	465.257	1437.42	10.2344	38.3019	228.703
Ao3042_00626	AO1008_04456	Contig119:99072-102522	15.1174	10.7376	18.8029	28.2548	19.3713	17.3534
Ao3042_00627	#N/A	Contig119:102579-105161	21.0444	22.5067	23.0826	20.1136	22.2279	36.6102
Ao3042_00628	#N/A	Contig119:105291-106813	14.4967	4.14874	4.74578	21.6197	13.6148	14.1308
Ao3042_00629	#N/A	Contig119:108835-110190	4.96565	2.19064	5.58857	1.18449	4.96409	1.35746
Ao3042_00630	#N/A	Contig119:115037-117544	265.512	126.784	162.275	120.96	184.009	356.017
Ao3042_00631	AO1008_01398	Contig119:118573-120049	1.6344	5.40782	8.89728	0.98572	1.70818	8.54812
Ao3042_00632	AO1008_01397	Contig119:121878-124511	20.0165	139.347	155.421	15.6483	45.7375	93.9769
Ao3042_00633	AO1008_01396	Contig119:127575-128959	18.9425	19.9333	40.5929	13.713	21.6597	33.4916
Ao3042_00634	AO1008_01395	Contig119:129408-131451	1.32998	1.21192	2.8988	0.286157	0.519553	1.51647
Ao3042_00635	AO1008_01394	Contig119:132560-133651	73.2651	126.535	81.4946	61.5723	78.6684	64.92
Ao3042_00636	AO1008_01393	Contig119:133859-135020	92.2911	128.862	84.6134	34.0898	128.845	362.518
Ao3042_00637	AO1008_01392	Contig119:135436-138647	141.213	161.038	88.3682	46.8759	108.204	121.978
Ao3042_00638	AO1008_01391	Contig119:135436-138647	0.186456	0.137976	0.176061	0	0.473175	0.276267
Ao3042_00639	AO1008_01390	Contig119:138961-139444	2.20813	1.10675	0	0	0	0
Ao3042_00640	AO1008_01389	Contig119:140058-140601	6.60059	6.59601	9.55534	3.84908	4.85454	5.01775
Ao3042_00641	AO1008_01388	Contig119:140754-141423	6.73634	4.66816	9.57996	2.25817	6.16348	4.3063
Ao3042_00642	AO1008_01387	Contig119:142717-144169	10.7668	7.7335	15.1128	15.1185	12.795	11.0481
Ao3042_00643	AO1008_01386	Contig119:144281-145625	32.1965	23.6855	25.5789	30.323	23.5579	25.2893
Ao3042_00644	AO1008_01385	Contig119:145923-148551	150.641	134.254	133.133	79.6116	85.6357	113.199
Ao3042_00645	AO1008_01384	Contig119:149029-151666	636.679	721.836	788.507	136.557	228.615	790.306
Ao3042_00646	AO1008_01383	Contig119:149029-151666	2.20586	0.221983	0.757699	3.63904	1.43046	0.830921
Ao3042_00647	AO1008_01382	Contig119:151789-154406	65.5711	48.2969	48.6482	69.3994	79.2197	58.8637
Ao3042_00648	AO1008_01381	Contig119:154754-155589	1.49484	1.27297	3.237	0.600536	2.18454	2.96932
Ao3042_00649	AO1008_01380	Contig119:156491-158387	4.44955	6.05696	4.20099	9.70137	4.85413	7.11883
Ao3042_00650	AO1008_01379	Contig119:160836-162619	19.4881	17.0127	19.6499	26.6765	20.934	15.2969
Ao3042_00651	AO1008_01378	Contig119:162647-163922	3.75974	3.34475	1.42131	5.49791	3.50564	3.34728
Ao3042_00652	AO1008_01377	Contig119:164296-165934	17.9042	17.0943	10.596	42.2467	31.6432	35.9273
Ao3042_00653	AO1008_01376	Contig119:167239-170246	73.2134	72.2049	68.2281	132.184	121.74	152.283
Ao3042_00654	AO1008_01375	Contig119:167239-170246	101.15	63.2149	80.8142	208.216	184.078	95.8699
Ao3042_00655	AO1008_01374	Contig119:170341-174074	79.6505	89.2825	95.4664	32.1961	49.3809	58.9829
Ao3042_00656	AO1008_01373	Contig119:176708-182857	26.2977	27.3954	17.5413	44.2179	44.4799	37.442
Ao3042_00657	AO1008_01372	Contig119:176708-182857	1.99874	1.5827	2.40083	3.34987	2.9583	0.953868
Ao3042_00658	AO1008_01371	Contig119:183179-185192	10.7742	8.66799	16.4624	21.7004	22.2915	22.7849
Ao3042_00659	AO1008_01370	Contig119:187724-189493	45.0852	55.6942	73.063	73.8153	51.5674	76.6831
Ao3042_00660	AO1008_01369	Contig119:190254-191724	61.3507	36.0055	27.8669	156.325	78.9215	55.7987
Ao3042_00661	AO1008_01368	Contig119:191931-194987	56.5637	55.8926	65.5554	89.4625	69.1535	45.2821
Ao3042_00663	AO1008_01366	Contig119:195354-200478	43.4289	54.4913	48.6734	43.5354	53.694	62.0086
Ao3042_00664	AO1008_01365	Contig119:195354-200478	40.2414	36.402	36.4126	27.5295	31.9751	20.8931
Ao3042_00665	AO1008_01364	Contig119:205220-208186	219.761	164.508	171.646	219.897	291.625	206.463
Ao3042_00666	AO1008_09747	Contig119:209233-210168	43.8372	61.6431	63.1058	19.3794	43.3192	55.9446
Ao3042_00667	AO1008_09746	Contig119:210951-212397	84.4157	71.5979	75.1704	153.906	95.9336	91.2604
Ao3042_00668	AO1008_09745	Contig119:212938-214549	148.99	188.181	173.697	396.492	276.745	185.837
Ao3042_00669	AO1008_09744	Contig119:214658-218197	37.7767	53.55	61.0773	16.4632	35.2478	43.2388
Ao3042_00670	AO1008_09743	Contig119:218359-221626	65.5729	65.0031	60.0198	96.4662	95.2884	93.3054
Ao3042_00671	AO1008_05750	Contig120:875-1979	187.964	269.747	218.643	184.321	188.885	232.304
Ao3042_00672	AO1008_05751	Contig120:10633-16387	6.69944	3.80247	4.6501	6.77079	7.43817	5.16255
Ao3042_00673	AO1008_05752	Contig120:16498-18393	12.4115	6.41716	4.88684	9.6429	10.3267	10.7473
Ao3042_00674	AO1008_05753	Contig120:20394-21439	1.98543	4.08247	8.08904	3.28306	3.89057	5.8994
Ao3042_00675	AO1008_05754	Contig120:21880-23593	16.3461	14.3847	27.6195	3.8063	8.08302	22.1897
Ao3042_00676	AO1008_05755	Contig120:24322-26549	21.7644	15.2131	16.6003	23.1668	27.1539	27.2569
Ao3042_00677	AO1008_05756	Contig120:28529-29519	0.45177	45.3918	232.997	0.281462	0.95891	8.94821
Ao3042_00678	AO1008_05757	Contig120:30984-32385	3.233	7.66202	7.32954	0.100503	1.36868	1.49128
Ao3042_00679	AO1008_05758	Contig120:32658-36644	9.25914	10.6662	6.26014	0.754276	1.77228	1.96267
Ao3042_00680	AO1008_05759	Contig120:37417-41243	33.7117	62.0971	66.2001	17.0157	23.4256	27.1298
Ao3042_00681	AO1008_05760	Contig120:51017-53301	102.103	47.1503	44.4596	90.8365	58.8083	43.5325
Ao3042_00682	AO1008_05761	Contig120:53832-54606	21.9356	31.4677	21.7273	17.9105	13.1136	11.7859
Ao3042_00683	AO1008_05762	Contig120:54883-55682	16.9717	15.8063	22.5093	4.37471	8.13749	7.37408
Ao3042_00684	AO1008_05763	Contig120:56279-57765	0.858881	2.26007	3.60465	0.266838	0.96885	2.92251
Ao3042_00685	AO1008_05764	Contig120:59598-61181	0	0.610335	0.778577	0	0.130826	1.5274
Ao3042_00686	AO1008_05765	Contig120:62672-63983	0	0	0	0	0	0
Ao3042_00687	AO1008_05766	Contig120:64385-65554	114.882	113.876	130.615	88.2375	128.714	166.522
Ao3042_00688	AO1008_05767	Contig120:67220-71041	45.5355	41.382	37.7425	18.7379	32.0331	28.6726
Ao3042_00689	AO1008_05768	Contig120:71239-72703	168.151	113.327	148.515	34.9023	59.8358	59.2783
Ao3042_00690	AO1008_05769	Contig120:73564-75243	86.0095	76.3442	63.3657	132.242	116.634	93.4418
Ao3042_00691	AO1008_05770	Contig120:76572-77544	0	1.12173	0.474877	0	0.641831	0.249083
Ao3042_00692	AO1008_05771	Contig120:77703-79324	4.5389	11.5792	8.02531	4.77077	6.25073	8.87283
Ao3042_00694	AO1008_05773	Contig120:79371-80411	3.47715	6.39753	4.06042	2.01108	3.77536	6.6576
Ao3042_00695	AO1008_05774	Contig120:81551-83397	0.36892	0.272982	1.2192	0	0.11702	0
Ao3042_00696	AO1008_05775	Contig120:85284-86418	0.515805	1.33866	1.46258	0.481532	0.327993	0.637909
Ao3042_00697	AO1008_05776	Contig120:88099-90355	54.017	46.3355	39.25	4.82448	14.8334	22.35
Ao3042_00698	AO1008_05777	Contig120:90995-92405	3.98335	11.4426	3.99979	2.20748	9.49584	11.0819
Ao3042_00699	AO1008_05778	Contig120:94192-96952	10.3989	173.849	179.242	23.0629	31.5203	555.009
Ao3042_00700	AO1008_05779	Contig120:100470-100964	5.02151	3.30295	13.7833	4.13556	12.3241	13.1249
Ao3042_00702	AO1008_05781	Contig120:104077-104706	777.854	1665.47	1588.39	408.049	626.195	831.231
Ao3042_00703	AO1008_05782	Contig120:106259-108451	0.148015	0	0	0.0689069	0.468949	0.365198
Ao3042_00704	AO1008_05783	Contig120:109872-110718	2.39258	1.78131	3.3987	6.72371	5.34908	2.96843
Ao3042_00705	AO1008_05784	Contig120:111248-111697	0.407476	0	0.776219	4.24152	0.527639	0.816601
Ao3042_00706	AO1008_05785	Contig120:111924-112854	0.809552	0.240571	0.306346	2.4223	2.68254	1.76474
Ao3042_00708	AO1008_05787	Contig120:114106-114946	1.27742	1.35733	0	8.88185	0.698648	1.26692
Ao3042_00709	AO1008_05788	Contig120:116201-118197	39.0287	12.6021	4.70988	56.6578	42.7716	16.8268
Ao3042_00710	AO1008_05789	Contig120:118368-120764	18.1277	6.86793	7.16768	26.8301	20.4766	12.4996
Ao3042_00711	AO1008_05791	Contig120:118368-120764	17.9992	24.1184	121.779	0.333532	2.72833	16.4342
Ao3042_00712	AO1008_05792	Contig120:122107-122532	0	0	0	0	0	0
Ao3042_00713	AO1008_05793	Contig120:123377-127194	0.0502607	0.0742023	0.379221	0	0.0635991	0.0495503
Ao3042_00714	AO1008_05794	Contig120:127559-129579	1.70225	2.51702	1.75271	1.29698	2.45197	2.90225
Ao3042_00715	AO1008_05795	Contig120:129749-131472	9.73135	11.0154	9.58607	5.75451	13.0921	19.2174
Ao3042_00716	AO1008_05796	Contig120:132539-133065	4.7039	5.98268	2.75364	5.12464	8.87591	13.7489
Ao3042_00717	AO1008_05797	Contig120:133162-133657	8.18477	5.34708	3.38462	9.4052	14.2369	28.8148
Ao3042_00718	AO1008_05798	Contig120:134104-135011	5.78427	5.30073	3.05346	6.66189	8.68955	14.1122
Ao3042_00719	AO1008_05799	Contig120:136510-137622	0	0.236975	0	0.149134	0.609784	0.316074
Ao3042_00720	AO1008_05800	Contig120:139826-141603	0	0.134751	0	0	0	0
Ao3042_00721	AO1008_05801	Contig120:141953-142664	0	0.332713	0	0	0	0
Ao3042_00722	AO1008_05802	Contig120:143832-145075	43.1109	32.9573	24.1426	55.4801	54.9618	41.4264
Ao3042_00723	AO1008_05803	Contig120:145302-146805	28.3917	27.1333	33.2855	48.3279	33.2796	30.8236
Ao3042_00724	AO1008_05804	Contig120:146981-149976	26.9149	24.9922	26.2018	31.3534	31.6122	40.5589
Ao3042_00725	AO1008_05805	Contig120:150959-152607	9.01488	8.7498	7.00033	5.88293	8.13776	13.1633
Ao3042_00726	AO1008_05806	Contig120:154120-155702	16.14	11.9439	17.7215	5.6845	12.1453	19.4656
Ao3042_00727	AO1008_05807	Contig120:155902-157201	7.08616	8.85761	15.4806	1.44583	4.36008	8.75641
Ao3042_00728	AO1008_05808	Contig120:160838-162440	13.4213	7.67102	4.71952	39.5063	21.3743	11.8855
Ao3042_00729	AO1008_05809	Contig120:162617-164958	11.4653	11.5779	13.6853	16.1096	10.4424	22.2688
Ao3042_00730	AO1008_05810	Contig120:165506-166411	4.90591	8.96621	4.65533	5.38062	6.64704	4.07133
Ao3042_00731	AO1008_05811	Contig120:166707-169193	2.58673	4.51547	3.77124	8.75161	9.82497	11.5382
Ao3042_00732	AO1008_05812	Contig120:169671-171477	33.8777	49.496	50.8237	119.358	107.131	95.6009
Ao3042_00733	AO1008_05813	Contig120:171762-172937	1.48659	2.93867	1.4049	1.96559	1.1025	2.57332
Ao3042_00734	AO1008_05814	Contig120:173069-175470	0.901108	2.04101	1.36015	1.17382	1.59735	1.36277
Ao3042_00735	AO1008_05815	Contig120:175859-177300	0	0	0.586748	0.0965378	0.13146	0.613911
Ao3042_00736	AO1008_05816	Contig120:179096-180443	2.13789	6.73916	9.34685	2.24582	4.58952	14.8094
Ao3042_00737	AO1008_05817	Contig120:181160-182586	0.141675	0	0.267909	0	0	2.10377
Ao3042_00738	AO1008_05818	Contig120:182588-185439	13.4172	58.3865	48.2067	9.22839	12.2714	125.207
Ao3042_00739	AO1008_05819	Contig120:188416-189527	15.1349	10.606	7.41979	35.866	24.7909	22.1953
Ao3042_00740	AO1008_05820	Contig120:190549-191810	19.3998	16.6403	29.0557	35.8678	23.7305	25.5837
Ao3042_00741	AO1008_05821	Contig120:192560-194145	20.187	10.395	21.3263	27.7582	20.5312	28.5435
Ao3042_00742	AO1008_05822	Contig120:194150-195599	15.8936	18.798	21.6401	16.2625	21.8831	24.1717
Ao3042_00743	AO1008_05823	Contig120:196272-197569	3.39708	6.65434	9.4012	2.37764	4.00975	9.71954
Ao3042_00744	AO1008_05824	Contig120:198220-201891	4.43783	5.53611	3.11924	1.91263	3.82637	7.19582
Ao3042_00745	AO1008_05825	Contig120:209302-209968	0	0	0	0	0	0
Ao3042_00746	AO1008_05826	Contig120:213780-215328	154.038	125.234	96.5927	150.323	151.255	110.899
Ao3042_00747	AO1008_05827	Contig120:215400-218022	126.113	105.516	108.576	201.137	202.402	206.91
Ao3042_00748	AO1008_05828	Contig120:220190-222498	68.7271	51.6806	45.484	143.588	106.476	84.1945
Ao3042_00749	AO1008_01067	Contig120:225990-226899	0.831428	0.247134	1.88797	0.311035	1.27191	2.80157
Ao3042_00750	AO1008_01068	Contig120:229983-232775	4.10764	2.04891	3.16929	2.46968	2.04169	6.3821
Ao3042_00751	AO1008_01069	Contig120:229983-232775	6.96635	2.36261	4.30241	2.14276	8.70181	2.01217
Ao3042_00752	AO1008_01070	Contig120:233057-236217	68.5872	60.604	38.9327	39.7577	60.759	80.1961
Ao3042_00754	AO1008_01072	Contig120:240853-242558	0.936324	0.4622	0	29.0049	15.8519	5.4492
Ao3042_00755	AO1008_01073	Contig120:243073-244233	7.87193	8.45701	30.0236	0.126746	1.72683	2.82078
Ao3042_00756	AO1008_01074	Contig120:244439-245978	33.8308	59.1676	58.969	50.6879	75.4062	67.6382
Ao3042_00757	AO1008_01075	Contig120:246519-248991	16.834	20.4004	30.4194	25.0383	27.2426	40.981
Ao3042_00758	AO1008_01076	Contig120:249861-252391	1.9105	1.19712	1.96608	4.30897	3.88457	5.42405
Ao3042_00759	AO1008_05829	Contig120:256981-257658	0.474106	0	0	0	0	0
Ao3042_00760	AO1008_05830	Contig120:259931-261299	275.906	556.2	307.545	331.115	392.274	328.142
Ao3042_00761	AO1008_05831	Contig120:261382-265181	22.6588	17.5695	27.574	22.9246	29.6247	32.3916
Ao3042_00762	AO1008_05832	Contig120:271279-273674	20.4246	21.8697	27.6039	70.076	44.0855	50.6182
Ao3042_00763	AO1008_05833	Contig120:273879-276049	14.5518	12.822	12.1473	16.6724	19.0573	20.4339
Ao3042_00764	AO1008_05834	Contig120:276610-279495	25.3905	16.8128	19.9008	35.5792	32.5634	19.1982
Ao3042_00765	AO1008_05835	Contig120:279880-281481	26.4763	25.1173	20.5952	16.8826	20.641	27.4496
Ao3042_00766	AO1008_05836	Contig120:281589-284628	6.32184	3.88342	4.92036	9.32883	10.2507	10.3198
Ao3042_00767	AO1008_05837	Contig120:281589-284628	211.363	170.396	170.722	538.836	388.841	403.406
Ao3042_00768	AO1008_05838	Contig120:285356-287902	59.47	67.6072	74.5759	111.813	83.0522	70.7883
Ao3042_00769	AO1008_05839	Contig120:288087-290139	35.1546	27.9829	30.3485	42.1888	38.7141	31.8084
Ao3042_00770	AO1008_05840	Contig120:290372-295133	146.523	166.627	191.565	51.9228	131.029	154.485
Ao3042_00771	AO1008_05841	Contig120:290372-295133	15.7742	13.385	18.0461	3.68825	9.52766	10.13
Ao3042_00772	AO1008_05842	Contig120:296432-297858	77.5692	88.1976	75.9219	63.0081	68.6149	57.8289
Ao3042_00773	AO1008_05843	Contig120:297889-298848	0.156234	0.23206	0.591118	0	0.398084	0.464298
Ao3042_00774	AO1008_05844	Contig120:299421-300044	0.274286	0	0.520578	0	0	0
Ao3042_00775	AO1008_05845	Contig120:301070-302212	1.89498	0.76835	1.6302	0.644647	3.29549	1.70776
Ao3042_00776	AO1008_05846	Contig120:303053-304755	9.74524	8.01128	8.17882	18.8341	16.7129	15.1503
Ao3042_00777	AO1008_05847	Contig120:305210-305771	76.7346	47.6108	53.8009	114.559	117.989	112.386
Ao3042_00778	AO1008_05848	Contig120:306276-307245	64.8663	64.133	77.6168	40.8503	66.0637	109.356
Ao3042_00779	AO1008_05849	Contig120:307530-310804	27.3352	40.1445	37.9202	32.4316	28.4514	56.2011
Ao3042_00780	AO1008_05850	Contig120:312036-313785	0.079911	0.472707	14.0297	0.14885	0.20262	1.89329
Ao3042_00781	AO1008_05851	Contig120:319133-322352	30.3111	41.7777	42.3814	30.9382	35.403	55.4397
Ao3042_00782	AO1008_05852	Contig120:323335-324853	2.52408	4.74238	2.38362	1.26686	0.985694	6.52193
Ao3042_00783	AO1008_05853	Contig120:324953-325709	0.621145	4.0097	1.96118	1.35817	0.529287	5.96173
Ao3042_00784	AO1008_05854	Contig120:327402-330808	0	0.125921	0	0	0	0.420256
Ao3042_00785	AO1008_05855	Contig120:331754-334329	1.78353	4.43913	10.092	9.16093	7.51703	15.9423
Ao3042_00786	AO1008_05856	Contig120:331754-334329	62.1064	41.2759	43.5574	64.5656	56.5348	57.6129
Ao3042_00787	AO1008_05857	Contig120:334513-336363	10.3042	6.78319	6.81457	16.9482	15.0615	15.218
Ao3042_00788	AO1008_05858	Contig120:337199-337576	0	0	0	0	0	0
Ao3042_00789	AO1008_05859	Contig120:338672-341328	1.12652	1.69462	1.42937	1.06436	1.45569	1.50286
Ao3042_00790	AO1008_05860	Contig120:338672-341328	211.787	179.009	123.827	317.751	232.891	133.305
Ao3042_00791	AO1008_05861	Contig120:342220-346067	5.73028	10.316	13.1398	4.5289	5.38121	6.071
Ao3042_00792	AO1008_05862	Contig120:342220-346067	10.4664	4.15423	9.1858	11.1672	14.0815	11.7111
Ao3042_00793	AO1008_05863	Contig120:346241-351315	26.9024	37.4657	38.9549	108.936	50.2678	35.0945
Ao3042_00794	AO1008_05864	Contig120:353012-356287	91.4685	293.511	340.294	74.2381	131.759	282.29
Ao3042_00796	AO1008_05866	Contig120:357998-362043	16.8474	26.9784	25.5319	29.4836	25.7888	25.0876
Ao3042_00797	AO1008_05867	Contig120:362218-364970	20.696	20.039	23.6399	34.5809	20.3344	20.4564
Ao3042_00798	AO1008_05868	Contig120:365028-367555	49.3679	23.8218	23.0028	58.6686	58.8647	40.2194
Ao3042_00799	AO1008_05869	Contig120:367684-372653	22.688	15.7077	25.3313	38.9288	28.2172	28.074
Ao3042_00800	AO1008_05870	Contig120:367684-372653	4.67944	6.00998	18.3292	3.52856	7.90454	4.97239
Ao3042_00801	AO1008_05871	Contig120:375449-382031	3.80486	2.68092	3.82135	5.34548	6.08912	6.17205
Ao3042_00802	AO1008_05872	Contig120:375449-382031	20.212	14.8452	12.4233	17.0733	20.8588	10.9172
Ao3042_00803	AO1008_05873	Contig120:382197-384821	22.013	15.3692	14.0233	20.8516	15.9965	13.7018
Ao3042_00804	AO1008_05874	Contig120:384831-387856	18.2968	28.3557	64.2719	2.9772	8.50606	7.61957
Ao3042_00806	AO1008_05876	Contig120:393239-400516	25.1758	20.7888	18.5423	27.1396	18.8878	18.2853
Ao3042_00808	AO1008_05878	Contig120:402252-402557	7.46358	3.44237	7.17602	1.43631	1.97646	1.51932
Ao3042_00809	AO1008_05879	Contig120:404846-405648	209.758	149.437	132.348	259.698	253.71	129.811
Ao3042_00810	AO1008_05880	Contig120:406193-407445	233.065	138.453	97.052	466.889	295.255	221.327
Ao3042_00811	AO1008_05881	Contig120:407838-410681	10.6529	13.4493	11.5552	25.6143	26.4259	32.5617
Ao3042_00812	AO1008_05882	Contig120:410976-413187	174.551	351.772	289.704	12.9706	89.256	160.953
Ao3042_00813	AO1008_05883	Contig120:414664-416609	50.7965	39.936	73.58	36.0123	48.0462	47.4876
Ao3042_00814	AO1008_05884	Contig120:418201-420253	12.1388	13.6963	14.37	10.7661	15.5634	15.1685
Ao3042_00815	AO1008_05885	Contig120:422360-424746	21.0117	27.6398	25.7064	26.4247	22.3117	18.2756
Ao3042_00816	AO1008_05886	Contig120:425484-426725	1.94781	10.3708	17.8129	8.65128	7.03368	7.23764
Ao3042_00817	AO1008_05887	Contig120:429191-430639	3.80946	5.64108	7.58506	0.86397	4.8367	7.63089
Ao3042_00818	AO1008_05888	Contig120:430800-431888	15.7534	27.0304	43.1852	15.6629	29.6222	24.612
Ao3042_00819	AO1008_05889	Contig120:431968-433445	23.9279	47.3962	33.0857	25.7008	38.2683	27.5849
Ao3042_00820	AO1008_05890	Contig120:433743-434952	15.3166	19.2223	19.3035	26.2781	25.3094	23.5748
Ao3042_00821	AO1008_05891	Contig120:435269-438282	13.1369	7.49771	7.92186	17.8482	13.594	13.4318
Ao3042_00822	AO1008_05892	Contig120:438596-443581	26.8121	27.3322	34.8356	17.7154	35.5371	27.4036
Ao3042_00823	AO1008_05893	Contig120:438596-443581	22.822	33.7401	27.7985	11.7435	33.5951	10.9038
Ao3042_00824	AO1008_05894	Contig120:444651-445191	2.84962	5.22138	2.40655	1.49146	4.89096	6.95086
Ao3042_00825	AO1008_05895	Contig120:445377-446165	1.00121	0	0	0	0	0
Ao3042_00826	AO1008_05896	Contig120:446347-452708	33.8444	52.2759	68.7631	18.8866	31.4431	30.7285
Ao3042_00827	AO1008_05897	Contig120:452907-456274	15.5994	18.1717	24.7091	18.292	22.447	20.9888
Ao3042_00829	AO1008_05899	Contig120:457125-458810	7.32194	4.55357	3.45592	7.8279	8.96806	6.0791
Ao3042_00830	AO1008_05900	Contig120:459910-460309	88.6605	121.73	210.651	52.892	129.261	156.837
Ao3042_00831	AO1008_05901	Contig120:460971-462694	9.83016	15.3708	13.8261	11.3075	8.1852	17.4907
Ao3042_00832	AO1008_05902	Contig120:462984-465555	107.918	147.434	139.881	154.988	132.75	113.306
Ao3042_00833	AO1008_05903	Contig120:465574-469432	34.2687	41.0501	36.572	17.2192	28.227	29.6985
Ao3042_00835	AO1008_05905	Contig120:472574-479132	34.2065	48.0725	33.9592	9.26288	20.572	31.2816
Ao3042_00836	AO1008_05906	Contig120:479143-482304	7.72285	21.8204	18.6665	76.7192	56.2898	18.2767
Ao3042_00837	AO1008_05907	Contig120:479143-482304	27.2541	28.7077	26.5389	30.6926	32.6048	26.885
Ao3042_00838	AO1008_05908	Contig120:484491-487158	173.644	171.029	173.119	94.8763	138.862	133.458
Ao3042_00840	AO1008_05910	Contig120:487525-488481	2.97925	1.39748	3.85631	0.293162	1.39842	2.796
Ao3042_00841	AO1008_05911	Contig120:489058-490151	117.888	129.289	190.813	112.005	112.41	270.69
Ao3042_00842	AO1008_05912	Contig120:491829-495930	42.537	45.1593	41.9926	24.9907	32.5463	42.5787
Ao3042_00843	AO1008_05913	Contig120:496129-499301	143.396	103.826	79.7891	150.807	152.148	97.0223
Ao3042_00844	AO1008_05914	Contig120:499397-500789	30.0568	26.2992	25.0576	49.177	44.1486	40.7032
Ao3042_00845	AO1008_05915	Contig120:501084-503436	1.50492	1.61752	1.54914	3.24736	3.37971	3.37469
Ao3042_00846	AO1008_05916	Contig120:506133-507150	0.145996	0.65018	0.552228	0	0	0.433673
Ao3042_00848	AO1008_05918	Contig120:510172-512421	17.4949	21.216	25.782	44.0151	26.1628	46.3516
Ao3042_00849	AO1008_05919	Contig120:513398-517035	97.4064	81.5101	140.096	72.1703	115.56	73.54
Ao3042_00850	AO1008_05920	Contig120:517074-518713	13.6622	10.8237	20.1701	16.0524	16.6062	15.8734
Ao3042_00851	AO1008_05921	Contig120:518715-520819	71.4045	63.8532	55.7641	163.64	87.6276	55.9067
Ao3042_00852	AO1008_05922	Contig120:521012-527981	22.7686	21.8966	20.5859	32.5174	25.0614	24.4982
Ao3042_00854	AO1008_05924	Contig120:521012-527981	9.36088	9.74487	16.2256	7.74389	9.92874	10.386
Ao3042_00855	AO1008_05925	Contig120:521012-527981	89.6531	71.4741	66.6616	179.545	105.109	83.8614
Ao3042_00856	AO1008_05926	Contig120:528102-529558	47.0913	45.5494	39.6717	66.9842	62.6399	45.8757
Ao3042_00857	AO1008_05927	Contig120:530579-531429	0	0.298282	0	0	0	0.397648
Ao3042_00858	AO1008_05928	Contig120:533312-534639	47.0197	72.3361	86.2557	63.5395	68.9235	95.5226
Ao3042_00859	AO1008_05929	Contig120:534986-538445	637.641	1007.79	792.49	468.518	656.255	818.813
Ao3042_00860	AO1008_10507	Contig1201:384-2896	450.794	803.116	586.826	1121.49	782.232	1028.93
Ao3042_00861	AO1008_10508	Contig1201:3161-4967	57.2362	33.8708	41.591	142.279	79.6342	60.3739
Ao3042_00862	AO1008_10509	Contig1201:7869-10839	22.0449	30.3935	34.5016	27.9569	29.6101	31.9015
Ao3042_00863	AO1008_10510	Contig1201:13330-17615	23.2797	19.7516	14.5901	25.4172	23.5541	21.3756
Ao3042_00864	AO1008_10511	Contig1201:18207-18747	1.2665	0.474671	1.20327	1.49146	1.22274	1.57974
Ao3042_00865	AO1008_10512	Contig1201:18835-22357	0.577727	0.948451	1.09017	0.716875	1.78859	1.01319
Ao3042_00866	AO1008_10513	Contig1201:22516-25895	31.5194	53.1412	41.1257	31.8514	51.6337	59.491
Ao3042_00867	AO1008_10514	Contig1201:29736-31630	0.987057	1.59331	3.04998	1.4214	3.18732	2.83591
Ao3042_00868	AO1008_10515	Contig1201:33853-34471	2.92405	3.57606	4.03518	2.24832	5.1159	8.73315
Ao3042_00869	AO1008_01010	Contig1202:1048-1642	57.8829	84.0801	73.7804	39.4445	57.8139	76.6039
Ao3042_00870	AO1008_01011	Contig1202:2212-3274	76.5521	124.726	108.234	84.217	123.763	189.64
Ao3042_00871	AO1008_01012	Contig1202:3479-6886	9.47793	7.8049	7.18154	9.12594	5.88654	6.21318
Ao3042_00872	AO1008_01013	Contig1202:15631-19002	51.6293	38.3129	38.3392	58.0383	46.2817	53.8867
Ao3042_00874	AO1008_10100	Contig1203:269-3499	16.4895	16.9893	16.5406	17.1159	19.9927	15.5327
Ao3042_00875	AO1008_10099	Contig1203:3742-4327	21.3886	11.9491	22.1982	30.045	25.2786	44.6138
Ao3042_00876	AO1008_10098	Contig1203:4354-12572	3.57012	3.81029	3.48977	3.71765	3.26507	4.25333
Ao3042_00877	AO1008_10097	Contig1203:12841-14961	8.76621	12.5588	7.57695	13.2043	8.81572	7.98859
Ao3042_00878	AO1008_10096	Contig1203:15040-17696	30.1059	37.1079	31.013	17.2881	26.3723	28.754
Ao3042_00879	AO1008_10095	Contig1203:18327-19473	459.317	402.309	397.51	182.297	294.073	307.974
Ao3042_00880	AO1008_10094	Contig1203:21662-22621	26.5394	29.9129	33.2414	27.0384	27.9206	34.1244
Ao3042_00881	AO1008_10093	Contig1203:23725-29724	15.1781	12.1447	15.786	23.3101	13.3238	20.8398
Ao3042_00882	AO1008_10092	Contig1203:23725-29724	166.922	147.832	158.432	177.657	139.75	115.263
Ao3042_00884	AO1008_10090	Contig1203:34841-35909	0.138043	0.819305	1.30507	0	0	1.09306
Ao3042_00885	AO1008_10089	Contig1203:36593-38575	13.3826	13.1898	26.6633	16.0602	14.2278	13.3546
Ao3042_00886	AO1008_10088	Contig1203:38819-40250	15.9154	12.6651	15.2186	31.1572	19.8238	15.5288
Ao3042_00887	AO1008_10087	Contig1203:40505-41985	1777.23	975.084	523.133	2465.69	3242.64	2543.3
Ao3042_00888	AO1008_10086	Contig1203:42402-44153	5.76488	6.9431	4.50897	4.60263	7.83189	8.37485
Ao3042_00889	AO1008_10085	Contig1203:44573-45487	4.86534	16.3495	12.2803	3.03557	6.66786	5.71837
Ao3042_00890	AO1008_10084	Contig1203:47701-48527	2.96954	3.34946	0.706391	5.25953	4.79522	3.71326
Ao3042_00891	AO1008_10083	Contig1203:48586-50356	30.608	31.4968	29.188	48.8556	28.5013	31.1489
Ao3042_00892	AO1008_10082	Contig1203:54109-57386	15.8136	11.9417	7.1095	11.7973	19.1325	10.0591
Ao3042_00893	AO1008_10081	Contig1203:57730-58274	0.723676	0.54388	0	0	0	0.361813
Ao3042_00894	AO1008_10080	Contig1203:59280-61018	29.5223	41.8639	34.2406	110.757	54.0027	55.8861
Ao3042_00895	AO1008_10079	Contig1203:61222-62851	17.4105	12.9539	15.285	45.0828	33.1989	33.1884
Ao3042_00896	AO1008_10078	Contig1203:62906-66711	0.0694718	5.23654	0.655559	0.258679	0.704131	2.87907
Ao3042_00897	AO1008_10077	Contig1203:69521-71463	0.263167	0.778719	0.662554	0	0.111268	0.693032
Ao3042_00898	AO1008_10076	Contig1203:73263-76134	8.28081	6.00265	4.48946	12.1741	10.5407	10.2166
Ao3042_00900	AO1008_10074	Contig1203:77855-79241	19.2923	11.0236	12.9166	26.6457	19.6619	17.0174
Ao3042_00901	AO1008_10073	Contig1203:79371-82269	12.3276	9.49473	11.1206	12.7781	12.3301	8.64606
Ao3042_00902	AO1008_10072	Contig1203:82515-84986	1320.15	1099.49	1208.44	982.053	960.165	1100.63
Ao3042_00903	AO1008_10071	Contig1203:87622-89152	165.339	86.1982	111.449	153.573	136.809	111.208
Ao3042_00904	AO1008_10070	Contig1203:89257-91215	31.79	23.2714	27.1697	35.7191	22.2556	18.1888
Ao3042_00905	AO1008_10069	Contig1203:94910-96471	296.117	182.339	185.613	272.373	287.649	216.987
Ao3042_00906	AO1008_10068	Contig1203:98764-99409	0.729506	0	0	0	0	2.22578
Ao3042_00907	AO1008_10067	Contig1203:104153-107356	45.2759	72.4622	194.176	18.7765	42.6268	42.9608
Ao3042_00908	AO1008_10066	Contig1203:108123-108864	9.9709	29.3997	8.84295	15.908	16.275	17.0657
Ao3042_00909	AO1008_10065	Contig1203:109051-110294	2.07381	1.23576	1.17861	6.6075	1.85552	2.47092
Ao3042_00910	AO1008_10064	Contig1203:110663-111911	0.463122	0.686298	0	1.09992	0.441366	0.457931
Ao3042_00911	AO1008_10063	Contig1203:115825-116891	7.10413	5.713	7.27803	18.5317	14.1342	14.5092
Ao3042_00912	AO1008_10062	Contig1203:117437-119882	6.70409	8.42617	14.395	9.24276	10.1371	10.4315
Ao3042_00913	AO1008_10061	Contig1203:119922-122331	22.5087	25.5011	49.3604	12.1158	21.4854	42.7133
Ao3042_00914	AO1008_10060	Contig1203:125059-126352	22.0361	16.1585	22.2899	25.7448	18.5207	24.8653
Ao3042_00915	AO1008_10059	Contig1203:126674-129091	8.89313	6.52413	11.2612	19.4923	11.5623	5.29802
Ao3042_00916	AO1008_10058	Contig1203:130176-131847	262.741	205.219	221.276	300.023	207.059	170.862
Ao3042_00917	AO1008_10057	Contig1203:132117-134930	726.09	447.624	272.778	1651.92	1409.38	783.249
Ao3042_00918	AO1008_10056	Contig1203:135097-136500	145.347	216.144	221.149	260.994	189.598	220.105
Ao3042_00919	AO1008_10055	Contig1203:136716-138801	672.712	735.66	821.633	856.163	734.717	810.911
Ao3042_00920	AO1008_10054	Contig1203:140200-144039	57.1703	36.7373	29.6822	90.4951	43.6345	29.8779
Ao3042_00921	AO1008_10053	Contig1203:145021-146839	1.63684	1.42524	4.36436	0.897451	0.85537	2.37803
Ao3042_00922	AO1008_10052	Contig1203:147069-151483	27.1282	20.9816	25.1369	22.6879	36.0881	23.302
Ao3042_00923	AO1008_10051	Contig1203:152347-155069	14.7449	13.3642	17.6588	23.8468	21.205	17.7415
Ao3042_00924	AO1008_10050	Contig1203:152347-155069	10.1926	7.99353	5.31701	12.4457	9.14772	19.5976
Ao3042_00925	AO1008_10049	Contig1203:155380-156147	56.1553	86.2384	80.1094	13.141	31.0354	35.6698
Ao3042_00926	AO1008_10048	Contig1203:157931-160002	9.3458	19.351	23.0136	0.908322	4.94587	4.49296
Ao3042_00927	AO1008_10047	Contig1203:160506-163742	73.5929	77.1118	183.745	9.42631	19.124	43.9585
Ao3042_00928	AO1008_10046	Contig1203:164050-167200	1.895	1.06547	1.44661	0.209755	0.513668	0.978362
Ao3042_00929	AO1008_10045	Contig1203:168003-169010	61.0969	123.212	137.087	29.0933	92.3996	143.45
Ao3042_00930	AO1008_10044	Contig1203:169340-171179	231.448	358.22	350.594	18.4219	67.0521	149.508
Ao3042_00931	AO1008_10043	Contig1203:171666-172572	172.439	207.66	255.868	224.664	222.179	208.788
Ao3042_00932	AO1008_10042	Contig1203:172760-173285	46.6761	40.9295	63.7296	48.6475	51.239	54.8067
Ao3042_00934	AO1008_10040	Contig1203:176329-176872	31.4404	26.68	33.7906	36.4259	28.6412	40.6273
Ao3042_00935	AO1008_10039	Contig1203:177559-178392	0	0.324207	0	0	0	0.21606
Ao3042_00937	AO1008_10037	Contig1203:186728-188898	0	0.206693	0.791789	0	0	0.206987
Ao3042_00938	AO1008_10036	Contig1203:189344-190292	20.5821	33.9939	48.2521	9.16482	20.8332	32.9757
Ao3042_00939	AO1008_10035	Contig1203:190954-192022	1.52449	0.283608	11.9077	0.713723	0	0.756261
Ao3042_00940	AO1008_10034	Contig1203:192901-194638	41.0563	55.8119	60.4892	40.5269	46.2468	47.144
Ao3042_00941	AO1008_10033	Contig1203:195531-197321	2.41827	2.26506	2.28265	1.72678	2.86157	9.86774
Ao3042_00942	AO1008_10032	Contig1203:197879-202699	11.647	13.5247	13.5033	8.73784	10.7442	10.3816
Ao3042_00943	AO1008_10031	Contig1203:202907-208947	15.7667	13.931	10.7562	11.208	14.5308	14.8138
Ao3042_00944	AO1008_10030	Contig1203:210181-213285	63.7285	14.1982	37.6883	13.3163	20.0798	33.4989
Ao3042_00945	#N/A	Contig1203:213483-213654	0	0	0	0	0	0
Ao3042_00946	AO1008_10028	Contig1203:213827-217533	62.8911	61.3391	30.2462	19.5656	23.3064	29.2516
Ao3042_00947	AO1008_10027	Contig1203:218084-219507	3.05392	4.05499	9.54909	1.76757	3.34311	4.37127
Ao3042_00948	AO1008_10026	Contig1203:219813-221311	194.201	130.955	159.994	280.618	227.631	226.361
Ao3042_00949	AO1008_10025	Contig1203:221525-222225	33.8756	37.8088	47.965	73.7296	39.0974	37.1907
Ao3042_00950	AO1008_10024	Contig1203:222798-223545	17.1881	34.4169	33.1509	9.90571	18.1538	11.874
Ao3042_00951	AO1008_10023	Contig1203:228829-229870	50.0341	12.4466	2.68797	16.1994	3.61851	6.75441
Ao3042_00953	AO1008_10021	Contig1203:232386-233284	254.429	213.944	251.842	294.653	227.67	191.657
Ao3042_00954	AO1008_10020	Contig1203:235141-235979	267.289	183.832	182.96	349.541	260.68	228.807
Ao3042_00955	AO1008_10019	Contig1203:236199-237090	56.3635	68.5565	105.999	74.918	64.9036	153.05
Ao3042_00956	AO1008_10018	Contig1203:237241-239988	0	0	0	0	0.502095	0
Ao3042_00957	AO1008_10017	Contig1203:237241-239988	76.8994	55.354	92.2395	52.714	61.7142	73.5685
Ao3042_00958	AO1008_10016	Contig1203:240717-246948	27.6521	25.212	20.4526	23.3758	29.6398	30.6168
Ao3042_00959	AO1008_10015	Contig1203:240717-246948	22.8347	17.8918	19.5789	43.5888	36.827	44.7895
Ao3042_00960	AO1008_10014	Contig1203:247287-248555	29.4648	34.7262	43.3623	57.6967	49.8858	45.2642
Ao3042_00961	AO1008_10013	Contig1203:248613-250631	273.262	195.792	170.374	587.932	393.02	252.046
Ao3042_00962	AO1008_10012	Contig1203:251857-252356	4.30415	1.10098	2.75666	3.4463	4.74005	3.6458
Ao3042_00963	AO1008_10011	Contig1203:252832-253633	173.039	267.917	306.106	131.119	217.277	343.019
Ao3042_00965	AO1008_10009	Contig1203:255960-256721	166.251	185.254	189.152	301.124	212.235	162.099
Ao3042_00966	AO1008_10008	Contig1203:257610-260640	724.226	504.973	477.159	1008.42	747.951	361.477
Ao3042_00967	AO1008_10007	Contig1203:264484-268237	34.2767	33.6021	39.5769	28.7695	29.3055	31.0739
Ao3042_00968	AO1008_10006	Contig1203:268317-269356	61.6731	61.1738	72.6633	99.3618	88.9743	107.873
Ao3042_00970	AO1008_10433	Contig1204:2874-4371	1.6734	1.5945	0.451786	2.89993	3.64611	1.89134
Ao3042_00971	AO1008_00757	Contig1205:0-3505	64.2798	52.822	45.9135	60.9075	66.0584	51.8612
Ao3042_00972	AO1008_00758	Contig1205:3643-6225	20.5285	17.0931	16.5675	3.51683	9.57122	12.4456
Ao3042_00973	AO1008_00759	Contig1205:6364-7692	13.1941	11.2918	11.3909	18.5687	15.0294	17.4308
Ao3042_00974	AO1008_00760	Contig1205:7784-11171	0	0	0	0	0	0
Ao3042_00975	AO1008_00761	Contig1205:7784-11171	56.4851	52.9303	47.1257	78.5498	64.3174	54.723
Ao3042_00976	AO1008_00762	Contig1205:11294-12695	45.0452	69.5522	58.2895	124.175	96.2729	78.1247
Ao3042_00977	AO1008_00763	Contig1205:13166-15575	111.943	64.6974	56.5987	474.113	150.904	70.7872
Ao3042_00978	AO1008_10516	Contig1206:120-3715	157.83	158.534	180.465	190.299	203.875	140.133
Ao3042_00979	AO1008_10517	Contig1206:120-3715	176.295	318.264	326.673	206.683	225.656	193.479
Ao3042_00980	AO1008_10518	Contig1206:4297-4771	4.30415	2.20197	4.13499	12.4067	7.58407	2.18748
Ao3042_00981	AO1008_10519	Contig1206:4854-5889	21.7492	14.866	14.8824	46.651	25.8637	24.7901
Ao3042_00982	AO1008_10520	Contig1206:6196-8118	9.79261	8.4838	11.4086	18.6651	17.7456	10.0432
Ao3042_00983	AO1008_10521	Contig1206:10347-14270	30.0331	38.553	36.2784	24.9577	49.8491	46.1607
Ao3042_00984	AO1008_10522	Contig1206:17221-18479	5.83854	11.669	29.75	5.2131	9.3611	19.2115
Ao3042_00985	AO1008_10523	Contig1206:19601-21405	4.23522	3.19361	2.8221	3.0168	4.9492	3.77159
Ao3042_00986	AO1008_10524	Contig1206:22729-23511	0	0	0	0.815787	0	0
Ao3042_00987	AO1008_10525	Contig1206:23646-24682	3.65668	3.10686	7.25059	3.74701	7.5512	2.93474
Ao3042_00988	AO1008_10526	Contig1206:24987-26948	13.282	8.66723	13.8672	33.0821	15.9336	14.5704
Ao3042_00989	AO1008_10527	Contig1206:27207-28884	12.6017	11.5525	13.3202	13.9357	15.6326	17.7433
Ao3042_00990	AO1008_10528	Contig1206:29255-30902	24.3113	13.3082	17.8245	33.6049	35.5839	28.0553
Ao3042_00991	AO1008_10529	Contig1206:31629-32836	64.2145	54.1732	69.2964	97.2077	83.6555	56.4618
Ao3042_00992	AO1008_10530	Contig1206:33947-38106	46.818	60.6241	55.4772	27.8195	42.302	38.7534
Ao3042_00994	AO1008_10532	Contig1206:40179-42319	29.6994	48.2988	37.9929	101.026	49.6653	57.0751
Ao3042_00995	AO1008_10533	Contig1206:42386-46341	277.132	181.708	676.516	18.7453	28.0762	113.682
Ao3042_00996	AO1008_10534	Contig1206:47574-50630	12.8671	15.4771	19.4316	13.8375	18.3046	14.6235
Ao3042_00997	AO1008_10535	Contig1206:51473-55024	12.9544	13.0594	17.0698	18.1377	23.1481	20.0997
Ao3042_00998	AO1008_10536	Contig1206:55424-57977	73.4552	70.1837	76.5825	47.8309	67.5504	81.5865
Ao3042_00999	AO1008_10537	Contig1206:59267-59793	0	0.699972	0	0	0	0.465067
Ao3042_01000	AO1008_10538	Contig1206:60450-62173	0	0	0	0	0	0
Ao3042_01001	AO1008_10539	Contig1206:62855-63355	0.597883	0	0	0	0	0
Ao3042_01002	AO1008_10540	Contig1206:65277-66595	9.04266	6.61682	4.73424	16.9689	6.36543	2.80002
Ao3042_01003	AO1008_10541	Contig1206:67643-69780	0.0660624	0	0	0.122972	0	0
Ao3042_01004	AO1008_10542	Contig1206:70038-70834	0	0	0.420709	0.208173	0	0
Ao3042_01005	AO1008_10543	Contig1206:71272-75320	165.629	139.306	100.465	69.5892	71.3056	111.578
Ao3042_01006	AO1008_10544	Contig1206:78966-80657	346.183	153.922	34.5049	805.562	494.709	153.302
Ao3042_01007	AO1008_10545	Contig1206:84930-87924	172.149	204.289	145.563	86.8775	126.795	116.195
Ao3042_01008	AO1008_10546	Contig1206:88348-91570	17.8968	15.54	15.7727	17.8071	18.3612	14.3926
Ao3042_01009	AO1008_10547	Contig1206:93160-100292	26.7093	19.4435	15.9338	20.5252	27.099	22.6743
Ao3042_01010	AO1008_10548	Contig1206:100365-103097	40.9075	46.7388	56.4776	28.0887	40.7182	40.9987
Ao3042_01011	AO1008_10549	Contig1206:103693-105256	4.29199	1.84083	1.92074	0.842886	0.717477	0.67
Ao3042_01012	AO1008_10550	Contig1206:105728-107208	1.72541	0.993205	1.62933	0.71475	0.729891	1.04166
Ao3042_01013	AO1008_10551	Contig1206:108166-110968	1.39931	3.99001	5.33465	0	0.5393	2.04828
Ao3042_01014	AO1008_10552	Contig1206:108166-110968	71.5757	89.7006	112.727	18.0793	33.8808	61.1772
Ao3042_01015	AO1008_10553	Contig1206:111164-114240	5.1414	57.6835	50.9823	6.55719	7.12485	11.585
Ao3042_01016	AO1008_03459	Contig1206:117863-120288	15.1523	8.86379	4.91739	12.8018	13.2001	20.0265
Ao3042_01017	AO1008_03460	Contig1206:122960-124008	2.68848	4.22867	6.28302	2.2177	5.44056	5.95359
Ao3042_01018	AO1008_03461	Contig1206:124922-128386	16.2885	19.1109	20.7691	14.7076	17.997	19.8713
Ao3042_01019	AO1008_03462	Contig1206:128798-130844	33.4614	32.5976	36.0599	44.8411	45.4602	48.4613
Ao3042_01020	AO1008_03463	Contig1206:130974-134702	22.927	8.77082	7.04452	34.9995	29.2279	24.2141
Ao3042_01021	AO1008_03464	Contig1206:130974-134702	3.63011	3.79607	2.50261	2.43892	2.75479	1.77616
Ao3042_01022	AO1008_03465	Contig1206:135796-137848	186.491	163.507	227.089	20.7973	42.4566	63.8776
Ao3042_01023	AO1008_03466	Contig1206:138320-141227	186.264	172.933	166.96	28.5344	59.0867	69.7683
Ao3042_01026	AO1008_03469	Contig1206.1:1737-2157	5.83032	3.38768	6.84251	9.78085	11.0637	4.05217
Ao3042_01027	AO1008_03470	Contig1206.1:2344-3908	27.616	21.6222	35.211	40.4206	47.4913	39.2884
Ao3042_01028	AO1008_03471	Contig1206.1:4051-6443	7.43297	4.89787	6.58015	11.7556	9.91638	7.7249
Ao3042_01029	AO1008_03472	Contig1206.1:6492-8555	8.03713	4.19844	18.4371	2.32185	2.5456	4.03353
Ao3042_01030	AO1008_03473	Contig1206.1:8656-9949	8.8855	7.13545	6.99757	5.87412	9.57048	10.3758
Ao3042_01031	AO1008_03474	Contig1206.1:11285-12693	2.73413	2.99876	5.5471	2.36023	2.18546	3.30209
Ao3042_01032	AO1008_03475	Contig1206.1:12820-15829	26.3706	28.1703	30.676	28.2366	31.3401	23.909
Ao3042_01033	AO1008_03476	Contig1206.1:16025-20294	174.715	161.726	159.452	431.022	148.468	238.345
Ao3042_01034	AO1008_03477	Contig1206.1:16025-20294	66.374	87.3385	77.9105	148.697	92.1547	84.5201
Ao3042_01035	AO1008_03478	Contig1206.1:20486-23563	146.331	151.357	154.894	232.418	169.343	139.08
Ao3042_01036	AO1008_03479	Contig1206.1:23694-24902	32.302	13.7505	15.4619	33.7304	44.3951	72.8422
Ao3042_01037	AO1008_03480	Contig1206.1:26017-28458	13.9697	21.2242	27.3278	13.5823	17.6124	14.567
Ao3042_01038	AO1008_03481	Contig1206.1:29024-30937	18.1137	16.625	22.4026	17.7412	19.9924	24.6623
Ao3042_01039	AO1008_03482	Contig1206.1:30966-38485	71.1169	54.8394	44.624	55.1935	47.5098	49.8559
Ao3042_01040	AO1008_03483	Contig1206.1:30966-38485	11.4306	5.8706	6.79425	5.15589	5.5381	9.47837
Ao3042_01041	AO1008_03484	Contig1206.1:30966-38485	35.5604	28.4905	30.2985	46.7434	35.5433	46.9903
Ao3042_01042	AO1008_03485	Contig1206.1:30966-38485	0	0	0.851587	0.947715	0	4.18486
Ao3042_01043	AO1008_03486	Contig1206.1:44433-47338	13.1278	10.9192	7.20676	3.05207	6.94163	13.6175
Ao3042_01044	AO1008_03487	Contig1206.1:47973-52167	14.7439	12.1705	10.2589	10.0131	12.3478	24.3796
Ao3042_01046	AO1008_03489	Contig1206.1:52327-53996	57.0988	38.0546	28.1655	76.2193	79.0881	57.5826
Ao3042_01047	AO1008_03490	Contig1206.1:54012-55503	4.56385	6.33293	8.61926	4.51949	3.61974	2.53601
Ao3042_01048	AO1008_03491	Contig1206.1:56175-58687	36.3082	28.986	28.322	28.707	38.4286	35.7489
Ao3042_01049	AO1008_03492	Contig1206.1:58694-59887	144.323	127.459	148.277	502.441	172.658	212.217
Ao3042_01050	AO1008_03493	Contig1206.1:59925-64448	111.922	89.3397	97.8503	80.6507	104.572	82.2967
Ao3042_01051	AO1008_03494	Contig1206.1:66072-67224	41.5055	44.3014	54.2969	35.0545	52.1065	65.0112
Ao3042_01052	AO1008_03495	Contig1206.1:67248-68133	61.1438	36.8135	63.0771	39.2493	51.128	68.6172
Ao3042_01054	AO1008_03497	Contig1206.1:72120-76896	22.5251	16.0835	18.1033	26.8208	23.2593	21.1936
Ao3042_01055	AO1008_03498	Contig1206.1:77114-79333	22.8445	35.2611	37.9294	27.02	24.568	37.4541
Ao3042_01056	AO1008_03499	Contig1206.1:80923-82775	1935.82	1548.03	1068.49	4004.21	3255.21	2334.75
Ao3042_01057	AO1008_03500	Contig1206.1:82895-86530	319.103	815.446	1096.78	55.5816	150.018	144.317
Ao3042_01058	AO1008_03501	Contig1206.1:82895-86530	81.8165	55.3082	94.2033	52.311	95.7387	70.7006
Ao3042_01059	AO1008_03502	Contig1206.1:89656-91594	1.62683	1.03093	1.31611	2.30851	2.35673	3.05867
Ao3042_01060	AO1008_03503	Contig1206.1:91964-92590	22.18	49.8934	87.0549	35.0285	42.3121	44.5058
Ao3042_01061	AO1008_03504	Contig1206.1:93111-94050	167.715	163.178	166.396	446.303	141.798	230.949
Ao3042_01062	AO1008_03505	Contig1206.1:94457-97348	54.8136	38.5869	81.4833	76.5683	119.835	106.087
Ao3042_01063	AO1008_03506	Contig1206.1:98120-100961	9.65861	9.86557	10.2131	25.4491	16.7263	8.36734
Ao3042_01064	AO1008_03507	Contig1206.1:101055-102910	16.5276	16.7918	11.9773	31.5686	29.3202	23.2414
Ao3042_01065	AO1008_03508	Contig1206.1:104450-108301	1395.68	690.371	352.691	5771.83	3753.64	2958.59
Ao3042_01066	AO1008_03509	Contig1206.1:104450-108301	319.797	104.264	49.4341	280.272	243.272	132.296
Ao3042_01067	AO1008_03510	Contig1206.1:110366-110969	69.086	37.3144	183.457	0.679414	7.89634	9.71366
Ao3042_01068	AO1008_03511	Contig1206.1:111547-117160	4.69885	5.06348	4.32331	11.5696	6.6295	3.03777
Ao3042_01069	AO1008_03512	Contig1206.1:111547-117160	14.183	17.9198	25.1148	21.7429	24.0278	22.965
Ao3042_01070	AO1008_03513	Contig1206.1:111547-117160	37.1382	31.3472	26.0055	46.98	39.2175	31.2717
Ao3042_01071	AO1008_03514	Contig1206.1:118040-119756	4.27331	1.83277	1.69988	10.5949	5.00033	3.33535
Ao3042_01072	AO1008_03515	Contig1206.1:119779-125244	4.53017	6.26818	7.25124	4.67825	5.75526	6.03123
Ao3042_01073	AO1008_03516	Contig1206.1:125913-126367	295.952	183.146	231.284	631.622	464.075	446.023
Ao3042_01074	AO1008_03517	Contig1206.1:126616-127852	34.5762	28.1491	25.8166	28.0624	33.9936	39.5011
Ao3042_01075	AO1008_03518	Contig1206.1:128029-133145	19.6875	21.7715	24.6002	19.6314	17.5527	19.988
Ao3042_01076	AO1008_03519	Contig1206.1:128029-133145	2.33678	2.04863	4.41219	4.67662	5.92757	6.83712
Ao3042_01077	AO1008_03520	Contig1206.1:134086-136423	24.5241	30.1618	39.1101	16.2759	22.8586	28.4884
Ao3042_01078	AO1008_03521	Contig1206.1:136512-138542	24.0737	33.6129	33.6515	6.31218	36.6639	26.7093
Ao3042_01079	AO1008_03522	Contig1206.1:136512-138542	13.8779	17.0701	22.4899	22.7214	17.1338	17.7842
Ao3042_01080	AO1008_03523	Contig1206.1:138645-139610	35.8994	35.9449	39.3593	53.0508	59.176	39.8261
Ao3042_01081	AO1008_03524	Contig1206.1:139833-142695	13.3185	10.8074	10.4518	17.5401	15.5671	14.0828
Ao3042_01082	AO1008_03525	Contig1206.1:143252-144830	11.3487	13.09	12.6554	6.07821	7.93504	10.6786
Ao3042_01083	AO1008_03526	Contig1206.1:144947-145932	25.7631	23.1796	29.4903	21.4246	32.1619	37.3905
Ao3042_01084	AO1008_03527	Contig1206.1:147556-148658	13.4969	12.1604	13.482	14.5981	18.9283	18.7743
Ao3042_01085	AO1008_03528	Contig1206.1:149167-151077	259.742	399.862	428.794	108.395	188.379	241.197
Ao3042_01086	AO1008_03529	Contig1206.1:154219-154613	0	0	0	0	0	0
Ao3042_01087	AO1008_03530	Contig1206.1:157209-159540	0.293813	0.173593	0.110868	0.710744	0.818374	1.21704
Ao3042_01088	AO1008_03531	Contig1206.1:160847-162014	0	0	0.471931	0.116522	1.11108	1.60539
Ao3042_01089	AO1008_03532	Contig1206.1:163031-164201	35.2249	25.386	30.1306	120.176	61.7816	51.8105
Ao3042_01090	AO1008_03533	Contig1206.1:164445-165722	7.33454	14.1356	16.6348	1.48308	4.35112	8.1008
Ao3042_01091	AO1008_03534	Contig1206.1:167905-169384	109.837	87.0413	109.065	70.0084	77.3045	104.243
Ao3042_01092	AO1008_03535	Contig1206.1:170050-172052	85.2649	60.4323	70.2956	79.3783	106.501	129.413
Ao3042_01093	AO1008_03536	Contig1206.1:172779-174693	8.46783	11.8012	16.2937	10.3897	11.1493	13.826
Ao3042_01094	AO1008_03537	Contig1206.1:175478-176105	5.34078	7.01285	7.61488	8.18317	10.324	5.66691
Ao3042_01095	AO1008_03538	Contig1206.1:177088-177952	20.8277	30.4474	36.7505	30.5542	28.8207	21.8761
Ao3042_01096	AO1008_03539	Contig1206.1:188774-190711	12.9448	7.17761	2.18172	90.9102	108.411	100.849
Ao3042_01097	AO1008_03540	Contig1206.1:191231-194200	11.339	14.4254	21.3814	14.6916	23.9123	19.2566
Ao3042_01098	AO1008_03541	Contig1206.1:191231-194200	11.6724	479.478	75.1513	7.84742	29.8819	19.9921
Ao3042_01099	AO1008_03542	Contig1206.1:196858-201050	20.0565	7.66038	9.34108	25.3698	21.7251	26.7264
Ao3042_01100	AO1008_03543	Contig1206.1:204336-207155	119.662	36.6321	79.6103	144.284	196.253	116.487
Ao3042_01101	AO1008_03544	Contig1206.1:210158-212345	1215.82	1262.53	775.147	763.027	693.78	1119.1
Ao3042_01102	AO1008_03545	Contig1206.1:212373-214903	10.9153	15.468	18.928	11.641	15.0724	17.8846
Ao3042_01103	AO1008_03546	Contig1206.1:215088-217979	47.1099	57.7856	52.5282	50.7529	49.9165	44.2797
Ao3042_01104	AO1008_03547	Contig1206.1:221172-222654	40.1349	43.8941	19.7763	276.348	160.445	115.785
Ao3042_01105	AO1008_03548	Contig1206.1:222939-226947	14.0276	20.1916	11.1527	42.2477	35.9332	28.9367
Ao3042_01106	AO1008_03549	Contig1206.1:230511-231527	4.82333	7.16014	14.6507	0.81938	2.04698	4.19694
Ao3042_01107	AO1008_03550	Contig1206.1:237693-238356	1.07658	0.804765	1.02149	2.27678	2.76317	5.09178
Ao3042_01108	AO1008_03551	Contig1206.1:240474-242443	34.4175	77.3327	163.697	80.6817	129.143	298.204
Ao3042_01109	AO1008_03552	Contig1206.1:242809-244238	0.0996247	0.589987	0	0.557241	1.13816	0.393744
Ao3042_01110	AO1008_03553	Contig1206.1:244857-246320	0.239945	1.06698	0.453469	0	0	0.593251
Ao3042_01111	AO1008_03554	Contig1206.1:247240-249632	31.9303	53.9802	60.2452	37.9033	40.9599	47.6231
Ao3042_01112	AO1008_03555	Contig1206.1:249763-252130	11.7549	0	0	0	35.8763	0
Ao3042_01113	AO1008_03556	Contig1206.1:249763-252130	227.128	236.206	225.758	186.746	241.867	154.622
Ao3042_01114	AO1008_03557	Contig1206.1:252276-255963	101.776	80.9813	71.1069	77.8221	111.568	102.503
Ao3042_01115	AO1008_03558	Contig1206.1:256703-258363	25.4541	16.6373	20.2772	37.2615	32.1726	19.7893
Ao3042_01116	AO1008_03559	Contig1206.1:259345-260005	1.4681	0.73059	1.85606	0.229711	2.50807	1.2168
Ao3042_01117	AO1008_03560	Contig1206.1:260084-262543	32.3623	20.2907	26.4613	20.0006	23.432	29.251
Ao3042_01118	AO1008_03561	Contig1206.1:263888-270191	33.188	52.7693	53.8512	25.9286	34.8778	39.2381
Ao3042_01119	AO1008_03562	Contig1206.1:270409-272161	34.3848	43.1149	37.9333	36.5937	46.951	81.5052
Ao3042_01120	AO1008_03563	Contig1206.1:272688-274950	35.0008	25.6568	40.3097	33.981	37.8327	34.5391
Ao3042_01121	AO1008_03564	Contig1206.1:275285-278681	58.9211	45.0983	38.6114	90.1224	65.474	55.1385
Ao3042_01122	AO1008_03565	Contig1206.1:284192-284944	0.406195	1.22426	0	1.15307	1.05187	3.66294
Ao3042_01123	AO1008_03566	Contig1206.1:285164-287568	6.80099	9.06837	12.3778	5.48805	7.46822	10.5664
Ao3042_01124	AO1008_03567	Contig1206.1:287631-289912	61.5729	21.051	34.8297	37.0937	78.4192	47.0299
Ao3042_01125	AO1008_03568	Contig1206.1:290548-292231	250.159	219.707	236.058	646.339	224.612	314.757
Ao3042_01126	AO1008_03569	Contig1206.1:292952-295271	67.9775	64.9135	47.6775	48.8495	62.8982	42.2751
Ao3042_01127	AO1008_03570	Contig1206.1:295839-298949	51.364	84.0545	77.4981	38.2897	51.0669	69.189
Ao3042_01128	AO1008_03571	Contig1206.1:299264-302580	71.0638	62.2195	73.7782	72.2091	81.6043	72.7883
Ao3042_01129	AO1008_03572	Contig1206.1:305469-307338	6.24883	3.51931	2.24663	9.83565	8.29647	5.13935
Ao3042_01130	AO1008_03573	Contig1206.1:314416-318774	94.1805	53.7061	86.2983	66.2265	101.442	75.0569
Ao3042_01131	AO1008_03574	Contig1206.1:319003-320455	195.387	135.928	142.733	130.667	197.674	96.8101
Ao3042_01132	AO1008_03575	Contig1206.1:321258-322598	232.205	235.224	248.917	194.115	227.774	267.91
Ao3042_01133	AO1008_03576	Contig1206.1:322910-326444	19.5096	15.4816	18.6143	17.9175	20.787	12.7138
Ao3042_01134	AO1008_03577	Contig1206.1:331320-331799	0	0	0	0	0	0
Ao3042_01135	AO1008_03578	Contig1206.1:333570-335862	6.99509	3.00656	3.59986	3.90584	11.8389	5.26938
Ao3042_01136	AO1008_03579	Contig1206.1:342794-347108	29.4074	24.0475	33.9995	30.5066	68.9733	82.4758
Ao3042_01137	AO1008_03580	Contig1206.1:348229-349003	1.00622	1.49846	2.28709	0.188532	0.257129	0
Ao3042_01138	AO1008_03581	Contig1206.1:349530-351221	4.72437	3.67781	4.06851	7.87486	5.25492	5.23729
Ao3042_01139	AO1008_03582	Contig1206.1:351497-352995	3.67074	3.99059	3.70013	12.2185	8.24392	6.65624
Ao3042_01140	AO1008_03583	Contig1206.1:353067-355531	1.45618	7.25245	10.4163	0.856415	5.3429	27.1575
Ao3042_01141	AO1008_03584	Contig1206.1:356413-357042	0	0	0	0	0	0
Ao3042_01142	AO1008_03585	Contig1206.1:358079-359381	0	0	0	0	0	0
Ao3042_01143	AO1008_03586	Contig1206.1:361354-363421	0	0.0986827	0	0.124311	0	0.0658846
Ao3042_01144	AO1008_03587	Contig1206.1:364257-364779	2.31863	4.47292	1.88895	1.24911	3.8411	9.26088
Ao3042_01145	AO1008_03588	Contig1206.1:367395-369473	2.08538	4.11134	3.20753	1.29464	1.56643	6.7089
Ao3042_01146	AO1008_03589	Contig1206.1:374493-376908	130.844	115.868	133.447	86.8052	117.461	209.039
Ao3042_01147	AO1008_03590	Contig1206.1:377002-379240	21.9153	7.4648	5.48195	25.0374	18.1562	6.41692
Ao3042_01148	AO1008_03591	Contig1206.1:380038-381876	3.03686	1.01516	2.40536	1.09581	2.23811	5.61365
Ao3042_01149	AO1008_03592	Contig1206.1:388427-389180	12.2342	13.5159	14.8485	6.66161	6.89719	9.9778
Ao3042_01150	AO1008_03593	Contig1206.1:393303-395837	21.8005	21.0671	27.7431	22.0569	19.9042	60.7018
Ao3042_01151	AO1008_03594	Contig1206.1:396137-397631	10.0646	16.4079	15.5547	10.0469	15.3588	16.1738
Ao3042_01152	AO1008_03595	Contig1206.1:397742-399496	2.3107	3.41964	2.79274	2.06723	5.74635	5.75161
Ao3042_01153	AO1008_03596	Contig1206.1:400304-401623	2.83358	3.02291	6.63918	2.22038	5.6161	3.92211
Ao3042_01154	AO1008_03597	Contig1206.1:401953-402542	1.65193	2.47848	3.76815	0	3.4054	11.8759
Ao3042_01155	AO1008_03598	Contig1206.1:403891-405442	3.19977	4.03939	2.84372	2.01733	3.82145	4.4623
Ao3042_01156	AO1008_03599	Contig1206.1:407085-408196	1.40749	0.626623	3.99227	0	0.179136	0.139329
Ao3042_01157	AO1008_03600	Contig1206.1:408664-410037	5.69001	4.91945	3.36033	0.221219	0.60263	1.64119
Ao3042_01158	AO1008_03601	Contig1206.1:412357-413874	8.34262	11.7752	10.6266	3.43603	7.264	15.6217
Ao3042_01159	AO1008_03602	Contig1206.1:415030-416876	1.80934	4.2355	0.996116	1.89534	3.15312	3.57158
Ao3042_01160	AO1008_03603	Contig1206.1:418665-419458	0	1.31703	1.25562	0.414188	1.13013	2.41358
Ao3042_01161	AO1008_03604	Contig1206.1:423366-424965	0	0.26064	0.166317	0	0.335178	0.260954
Ao3042_01162	AO1008_03605	Contig1206.1:425115-426233	0	0.216727	0	0	0	0.144558
Ao3042_01163	AO1008_03606	Contig1206.1:430700-431999	0.110721	0.984179	0.83679	0	0	0
Ao3042_01164	AO1008_03607	Contig1206.1:432392-434419	0.0877223	0	0.496915	0	0	0
Ao3042_01165	AO1008_03608	Contig1206.1:434723-435279	0.60936	0	1.1575	0.573746	1.1757	0
Ao3042_01166	AO1008_03609	Contig1206.1:435697-436754	0	0.234347	0.596916	0	0.201005	0.312576
Ao3042_01167	AO1008_03610	Contig1206.1:437750-439652	0.219012	0	0	0	0	0
Ao3042_01168	AO1008_03611	Contig1206.1:441374-442262	1.17024	0.349202	0	0.219612	0	0
Ao3042_01169	AO1008_03612	Contig1206.1:442332-443250	0.986291	0.244278	0	0.153723	0	0
Ao3042_01170	AO1008_03613	Contig1206.1:444890-446603	11.4661	2.01063	6.29179	0.575341	0	0.243903
Ao3042_01172	AO1008_03615	Contig1206.1:451120-451609	2.98941	0.911175	10.3047	1.71326	7.8391	16.3179
Ao3042_01173	AO1008_03616	Contig1206.1:451739-453152	7.08398	9.1485	23.8878	5.03795	15.6934	59.9471
Ao3042_01174	#N/A	Contig1206.1:455261-455897	2.05065	4.21237	0	0.240783	0.328681	0.765245
Ao3042_01175	AO1008_03618	Contig1206.1:456152-458860	11.3775	13.2303	5.49556	1.38047	2.50456	4.76945
Ao3042_01176	AO1008_03619	Contig1206.1:461015-463282	35.7745	51.6089	41.6853	9.15757	16.8371	54.771
Ao3042_01177	AO1008_03620	Contig1206.1:463524-464194	215.826	542.965	186.915	36.1632	29.2276	29.7415
Ao3042_01178	AO1008_03621	Contig1206.1:464212-468628	17.6762	25.3991	13.0793	8.96832	11.7029	10.7553
Ao3042_01179	AO1008_03622	Contig1206.1:469310-470732	0.448651	0.997074	0.211929	0.523126	0.284984	0.110887
Ao3042_01180	AO1008_03623	Contig1206.1:471785-473927	0.160119	0.118397	0.302275	0.149127	0.304497	0.632274
Ao3042_01181	AO1008_03624	Contig1206.1:474312-476420	54.1258	166.123	144.821	50.3226	101.563	295.699
Ao3042_01182	AO1008_03625	Contig1206.1:477229-479489	27.2569	33.2185	41.9124	27.2494	41.7746	54.1167
Ao3042_01183	AO1008_03626	Contig1206.1:479597-482014	69.7667	115.298	83.5772	75.051	97.3893	88.3623
Ao3042_01184	AO1008_03627	Contig1206.1:479597-482014	10.7656	21.619	19.0255	15.7217	12.3727	18.6299
Ao3042_01185	AO1008_03628	Contig1206.1:482239-485335	1.52842	6.18629	4.28515	11.4225	6.1178	6.42655
Ao3042_01186	AO1008_03630	Contig1206.1:482239-485335	10.6902	50.6083	42.6209	5.88846	17.4204	44.6194
Ao3042_01187	AO1008_03631	Contig1206.1:486579-487705	37.76	11.6126	32.7125	19.3639	6.2899	2.58215
Ao3042_01188	AO1008_03632	Contig1206.1:487892-488812	0.226658	0	0	0.637808	0	0
Ao3042_01189	AO1008_03633	Contig1206.1:489719-493862	0.554744	0.481278	0.0615231	0.0303225	0	0.482178
Ao3042_01190	AO1008_03634	Contig1206.1:493868-495342	114.567	196.425	123.811	14.3338	52.8859	284.338
Ao3042_01191	AO1008_03635	Contig1206.1:495928-500013	39.2407	78.798	70.2348	47.0589	42.5625	68.1055
Ao3042_01192	AO1008_03636	Contig1206.1:500907-502762	162.604	89.6131	67.2722	117.88	153.036	97.5338
Ao3042_01193	AO1008_03637	Contig1206.1:505141-505651	0	0	0	0	0	0
Ao3042_01194	AO1008_03638	Contig1206.1:506142-508714	3.4877	3.5201	1.64504	5.51623	2.20775	4.98745
Ao3042_01195	AO1008_03639	Contig1206.1:508732-511774	1.81736	3.76502	2.23071	3.13296	2.99733	2.33346
Ao3042_01196	AO1008_03640	Contig1206.1:508732-511774	4.63046	12.2494	7.49889	11.4142	11.6236	14.2771
Ao3042_01197	AO1008_03641	Contig1206.1:512818-514050	1.34312	28.6918	27.1711	0.12542	3.07572	7.57634
Ao3042_01198	AO1008_03642	Contig1206.1:516167-517112	0.772497	0.287465	2.92575	0	0.246625	0.19163
Ao3042_01199	AO1008_03643	Contig1206.1:518895-519881	1.68523	0.83587	3.54533	0.701201	0.47806	1.1145
Ao3042_01200	AO1008_03644	Contig1206.1:522188-524054	18.3498	14.1903	17.3914	75.2849	35.6183	38.0431
Ao3042_01201	AO1008_03645	Contig1206.1:526820-530236	5.04175	17.6935	11.9849	0.748365	3.59015	10.2297
Ao3042_01202	AO1008_03646	Contig1206.1:530862-532476	1.13347	1.93492	1.6463	5.84872	1.21648	0.947109
Ao3042_01203	AO1008_03647	Contig1206.1:532597-534755	3.63615	5.47297	2.4144	3.25911	3.58255	1.26227
Ao3042_01204	AO1008_03648	Contig1206.1:536666-538491	0.279281	0.826657	0.879034	0.520547	1.18122	0.275867
Ao3042_01205	AO1008_03649	Contig1206.1:538625-540710	4.52881	8.85443	5.51478	0.544063	2.77695	7.35287
Ao3042_01206	AO1008_03650	Contig1206.1:541510-543257	27.6243	36.4675	34.2497	4.76215	15.1611	31.8326
Ao3042_01207	AO1008_03651	Contig1206.1:544253-546372	27.9742	16.6592	8.82059	29.1107	18.8084	17.9039
Ao3042_01208	AO1008_03652	Contig1206.1:546686-550363	76.915	42.2524	26.5584	38.147	35.5688	45.2194
Ao3042_01209	AO1008_03653	Contig1206.1:551513-556866	34.1494	26.337	20.8257	8.71281	19.5831	39.5956
Ao3042_01210	AO1008_03654	Contig1206.1:557814-559053	32.7988	32.0011	13.2343	8.60323	15.2777	58.517
Ao3042_01211	AO1008_03655	Contig1206.1:561367-562875	15.0622	13.5454	4.8782	9.63215	14.0738	21.6937
Ao3042_01212	AO1008_03656	Contig1206.1:563871-565720	17.0678	38.6059	60.6128	29.6843	29.934	43.773
Ao3042_01213	AO1008_03657	Contig1206.1:566032-570162	0	2.80724	19.8024	4.97755	0.492344	16.3016
Ao3042_01214	AO1008_03658	Contig1206.1:566032-570162	60.7285	65.6043	46.1201	43.7629	47.0345	39.8993
Ao3042_01215	AO1008_03659	Contig1206.1:570666-574735	3.09877	1.55649	2.80656	5.65172	3.68862	3.8513
Ao3042_01216	AO1008_03660	Contig1206.1:574994-579121	57.4144	64.4976	57.9954	26.8705	39.9841	42.9516
Ao3042_01217	AO1008_03661	Contig1206.1:585369-586422	0.420871	1.24913	0.795844	0	0	1.11098
Ao3042_01218	AO1008_03662	Contig1206.1:587815-589339	0.669998	0.5667	0.180768	0.267633	0.485869	0.18911
Ao3042_01219	AO1008_03663	Contig1206.1:592014-595559	0.175445	0.129787	0.331277	0	0	0.173258
Ao3042_01220	AO1008_03664	Contig1206.1:596728-598010	0.172271	0.256117	0	0	0	0
Ao3042_01221	AO1008_03665	Contig1206.1:598610-599084	0.426294	0.643175	0	0	0.552685	0
Ao3042_01222	AO1008_03666	Contig1206.1:599273-600480	0	0	0	0	0	0
Ao3042_01223	AO1008_03667	Contig1206.1:600912-606919	8.22727	7.29836	4.62015	8.20152	9.05241	9.70698
Ao3042_01224	AO1008_03668	Contig1206.1:600912-606919	39.129	32.4234	36.5779	45.999	41.4063	35.101
Ao3042_01225	AO1008_03669	Contig1206.1:607102-610233	36.7477	35.0118	46.9353	27.3834	33.518	33.4841
Ao3042_01226	AO1008_03670	Contig1206.1:610452-612237	55.979	44.5818	39.7166	86.9446	64.245	59.0069
Ao3042_01227	AO1008_03671	Contig1206.1:612244-615956	12.2689	9.19032	9.16791	15.4636	19.7871	15.794
Ao3042_01228	AO1008_03672	Contig1206.1:619192-623508	14.0199	12.4124	13.2396	14.3915	11.9113	12.3428
Ao3042_01229	AO1008_03673	Contig1206.1:619192-623508	4.75115	8.33789	6.53598	4.01545	5.06209	6.5656
Ao3042_01230	AO1008_03674	Contig1206.1:623984-633253	19.341	16.553	17.1126	31.7925	22.2765	22.8409
Ao3042_01231	AO1008_03675	Contig1206.1:623984-633253	160.334	247.795	211.563	661.871	416.51	130.182
Ao3042_01232	AO1008_03676	Contig1206.1:623984-633253	36.9512	35.4679	33.9467	57.0433	57.1262	47.1207
Ao3042_01233	AO1008_03677	Contig1206.1:623984-633253	12.6717	7.59564	12.9012	15.1161	10.6923	11.6645
Ao3042_01234	AO1008_03678	Contig1206.1:636535-637805	3.86044	1.8506	3.43271	5.61372	6.49158	6.7355
Ao3042_01235	AO1008_03679	Contig1206.1:638800-640994	85.8117	32.9238	35.9757	71.7127	113.707	43.8897
Ao3042_01236	AO1008_03680	Contig1206.1:641875-647429	69.2682	73.3307	62.4765	68.621	69.0718	62.8374
Ao3042_01237	AO1008_03681	Contig1206.1:647653-649279	9.07707	6.3203	8.9061	6.05299	7.78918	5.53687
Ao3042_01238	AO1008_03682	Contig1206.1:652057-653291	12.1394	14.0798	15.5668	22.4165	20.9538	19.0602
Ao3042_01239	AO1008_03683	Contig1206.1:653626-655863	34.2587	24.109	30.9152	35.4315	33.7551	34.0027
Ao3042_01240	AO1008_03684	Contig1206.1:656565-659048	16.7517	14.4971	21.8885	1.46623	6.44044	12.9986
Ao3042_01241	AO1008_03685	Contig1206.1:659271-662067	255.964	220.745	295.029	469.729	274.933	404.532
Ao3042_01242	AO1008_03686	Contig1206.1:663139-665530	67.4793	55.8775	32.3757	54.1212	44.3177	31.5339
Ao3042_01243	AO1008_03687	Contig1206.1:665785-672670	56.3625	69.0526	64.7661	50.0969	53.7419	50.0973
Ao3042_01244	AO1008_03688	Contig1206.1:665785-672670	0	0	0	0	0	0
Ao3042_01245	AO1008_03689	Contig1206.1:674753-678981	2975.62	183.842	259.468	2100.51	3503.2	230.03
Ao3042_01246	AO1008_03690	Contig1206.1:674753-678981	3.1138	5.07903	4.14405	2.22435	3.85312	3.8072
Ao3042_01247	AO1008_03691	Contig1206.1:679410-682289	35.3541	30.2283	32.8401	54.076	43.2503	32.8467
Ao3042_01248	AO1008_03692	Contig1206.1:682468-685077	13.1602	9.46677	16.1597	16.3592	19.4601	22.3758
Ao3042_01249	AO1008_03693	Contig1206.1:685265-689117	114.868	179.999	168.769	124.343	155.945	152.431
Ao3042_01250	AO1008_03694	Contig1206.1:694489-696210	8.37742	7.0098	14.8584	17.973	14.8091	15.2904
Ao3042_01251	AO1008_03695	Contig1206.1:696309-697587	31.9507	46.7621	60.1479	71.534	74.8559	90.9357
Ao3042_01252	AO1008_03696	Contig1206.1:698858-700942	9.86136	14.7746	17.0701	21.3967	16.628	21.5397
Ao3042_01253	AO1008_03697	Contig1206.1:701210-703101	212.193	189.991	155.289	392.716	266.753	248.874
Ao3042_01254	AO1008_03698	Contig1206.1:704636-706553	1.54236	2.15492	1.77964	0.638608	1.41274	2.62293
Ao3042_01255	AO1008_03699	Contig1206.1:706877-710432	25.9092	18.2474	19.4212	31.7737	32.5597	21.8159
Ao3042_01256	AO1008_03700	Contig1206.1:710903-713300	27.0561	24.5131	24.323	20.7846	18.7493	24.6127
Ao3042_01257	AO1008_03701	Contig1206.1:713368-717209	26.556	21.6028	19.7877	24.1919	18.6935	16.78
Ao3042_01258	AO1008_03702	Contig1206.1:713368-717209	19.357	18.6733	19.5563	36.3343	35.8062	45.9973
Ao3042_01259	AO1008_03703	Contig1206.1:718261-723145	41.0962	35.6637	49.3431	32.8476	30.2092	26.8269
Ao3042_01260	AO1008_03704	Contig1206.1:725958-727856	202.379	168.293	204.334	254.902	300.744	314.356
Ao3042_01261	AO1008_03705	Contig1206.1:728119-730929	24.3985	19.9805	23.68	28.3567	39.41	25.9334
Ao3042_01262	AO1008_03706	Contig1206.1:731196-733378	286.826	311.691	254.991	293.209	244.46	173.725
Ao3042_01263	AO1008_03707	Contig1206.1:739717-742797	15.0651	18.7212	23.0589	8.08959	12.3383	8.98171
Ao3042_01264	AO1008_03708	Contig1206.1:743073-744692	109.675	139.66	119.38	310.569	177.817	129.9
Ao3042_01265	AO1008_03709	Contig1206.1:744695-748566	20.1744	19.4886	27.9779	23.6062	26.0346	25.435
Ao3042_01266	AO1008_03710	Contig1206.1:753686-754779	29.1294	33.7016	35.4966	22.0737	25.6775	16.1134
Ao3042_01267	AO1008_00441	Contig1206.1:756077-759508	91.5446	79.8301	70.6374	57.1978	81.8114	60.546
Ao3042_01268	AO1008_00442	Contig1206.1:759620-760762	18.9954	15.5187	17.4891	46.2648	30.7702	30.0257
Ao3042_01269	AO1008_00443	Contig1206.1:760794-761557	17.2112	9.33228	57.1911	11.7392	9.15212	20.8774
Ao3042_01270	AO1008_00444	Contig1206.1:766460-769238	194.828	249.576	302.703	98.6619	148.811	99.6721
Ao3042_01271	AO1008_00445	Contig1206.1:771804-774536	331.318	381.104	410.013	147.095	187.944	246.474
Ao3042_01272	AO1008_00446	Contig1206.1:771804-774536	0	0	0	0	0	0
Ao3042_01273	AO1008_00447	Contig1206.1:775148-778797	0	0.0864222	1.69625	0	0	0
Ao3042_01274	AO1008_00448	Contig1206.1:775148-778797	17.379	15.8707	21.2629	19.2939	16.6301	14.8423
Ao3042_01275	AO1008_00449	Contig1206.1:778866-781536	123.273	131.715	100.671	210.826	143.264	103.59
Ao3042_01276	AO1008_00450	Contig1206.1:781664-787565	40.0061	51.5211	55.2231	50.009	55.1451	85.1779
Ao3042_01277	AO1008_00451	Contig1206.1:781664-787565	64.6479	67.8533	61.7977	102.022	96.8362	76.8745
Ao3042_01278	AO1008_00452	Contig1206.1:788056-792486	37.5561	26.7948	59.3744	30.8544	32.2361	21.225
Ao3042_01279	AO1008_00453	Contig1206.1:788056-792486	58.4795	48.5984	89.5503	42.7521	52.4519	50.9109
Ao3042_01280	AO1008_00454	Contig1206.1:792731-796830	60.5463	54.2037	46.0475	59.9477	56.1444	35.0963
Ao3042_01281	AO1008_00455	Contig1206.1:799967-803791	38.2868	16.4135	12.6685	34.1615	43.6832	35.409
Ao3042_01283	AO1008_00457	Contig1206.1:803884-805324	36.4524	28.2262	30.9735	16.7602	25.3291	27.5245
Ao3042_01284	AO1008_00458	Contig1206.1:808007-811465	49.4943	56.6028	43.4197	45.3006	57.2208	72.4086
Ao3042_01285	AO1008_00459	Contig1206.1:811903-813769	59.4201	55.9971	46.2194	118.958	77.7701	61.0788
Ao3042_01286	AO1008_00460	Contig1206.1:814761-815242	472.985	584.872	705.88	404.553	562.271	644.996
Ao3042_01287	AO1008_00461	Contig1206.1:815699-818277	48.6027	54.7599	65.973	54.2483	65.9908	62.5061
Ao3042_01288	AO1008_02022	Contig1206.1:820038-822830	58.4746	59.9955	55.3829	83.7658	67.0122	50.6918
Ao3042_01289	AO1008_02023	Contig1206.1:822833-824156	47.1933	46.9256	47.758	86.0044	84.1921	70.027
Ao3042_01290	AO1008_02024	Contig1206.1:824372-826900	59.5853	53.6401	58.5384	87.3668	84.9621	97.8849
Ao3042_01291	AO1008_10480	Contig1207:3319-5676	76.7963	36.6403	34.7812	60.5754	105.775	37.2702
Ao3042_01292	AO1008_10479	Contig1207:5824-9734	25.6436	34.0186	38.5461	26.6657	38.0869	30.1057
Ao3042_01293	AO1008_10478	Contig1207:11774-18223	29.915	26.4871	22.23	28.9181	36.5115	23.8165
Ao3042_01295	AO1008_10476	Contig1207:18926-20958	9.86111	7.45068	11.7189	6.32473	20.642	74.3937
Ao3042_01296	AO1008_10475	Contig1207:21417-22967	22.9592	34.3219	40.3485	35.0538	35.6669	32.4029
Ao3042_01297	AO1008_10474	Contig1207:23301-24019	416.849	265.724	244.411	700.92	568.713	476.411
Ao3042_01298	AO1008_10473	Contig1207:24296-26192	27.1089	18.9455	20.9414	40.0873	27.432	23.2891
Ao3042_01299	AO1008_10472	Contig1207:27091-29080	53.8856	52.9279	60.7967	49.3101	41.5179	49.1878
Ao3042_01300	AO1008_10471	Contig1207:29301-32960	1836.1	940.213	1578.08	426.044	687.522	657.105
Ao3042_01301	AO1008_10470	Contig1207:29301-32960	0.632388	0	0.596806	0.0736024	0.400756	0.156031
Ao3042_01302	AO1008_10469	Contig1207:34777-36034	205.266	153.83	224.606	114.615	171.438	165.34
Ao3042_01303	AO1008_10468	Contig1207:36779-39147	57.0632	44.5001	69.546	40.003	46.747	65.6521
Ao3042_01304	AO1008_10467	Contig1207:40541-41842	3.68041	21.8356	11.9276	0.490897	1.67193	5.98286
Ao3042_01305	AO1008_10466	Contig1207:46130-48130	2.55491	10.3031	7.74578	0.86517	1.76648	12.1509
Ao3042_01306	AO1008_10465	Contig1207:48453-50138	8.167	5.03741	4.40716	8.97207	7.77409	6.81995
Ao3042_01308	AO1008_10463	Contig1207:52712-57436	12.9484	9.73878	6.22535	2.52977	12.5555	20.7417
Ao3042_01309	AO1008_10462	Contig1207:57958-58789	6.83898	7.42496	8.74864	0.346047	1.65141	3.30009
Ao3042_01310	AO1008_10461	Contig1207:58976-59303	1.98666	1.01306	0	0	0	2.01419
Ao3042_01311	AO1008_10460	Contig1207:60819-61767	109.413	95.7331	76.3877	6.95736	22.5962	11.765
Ao3042_01312	AO1008_10459	Contig1207:62189-62946	0	0	0	0	0	0
Ao3042_01313	AO1008_10458	Contig1207:63724-65880	0	0.252045	0.641767	0	0	0
Ao3042_01314	AO1008_10457	Contig1207:66132-68273	0.286173	0.637116	0.811768	0	0.182138	0
Ao3042_01315	AO1008_10456	Contig1207:70626-72742	0.526494	0.3336	0.283941	1.33064	0.953257	0.593872
Ao3042_01316	AO1008_10455	Contig1207:74063-76521	0	0	0	0	0	0.06122
Ao3042_01317	AO1008_10454	Contig1207:77842-78489	1.76472	102.336	364.529	0	5.92029	14.8166
Ao3042_01318	AO1008_11567	Contig1208:2285-3677	0	0.482113	0.819879	0.202363	0.413382	1.50134
Ao3042_01319	AO1008_11566	Contig1208:3992-5297	0.110155	0.652742	0	0	0	0
Ao3042_01320	AO1008_11565	Contig1208:6116-9399	0	0.156075	0	0	0	0
Ao3042_01321	AO1008_11564	Contig1208:10132-11919	0.468458	1.61632	0	0	0	0.154139
Ao3042_01322	AO1008_11563	Contig1208:12598-13943	0.116722	1.38383	0.441142	0.435607	0.593307	1.73127
Ao3042_01323	AO1008_11562	Contig1208:14664-16368	0.518927	1.53693	1.17633	0.870944	0.527113	0.82053
Ao3042_01324	AO1008_11561	Contig1208:16969-20228	0	1.18308	0.377897	0	0.126753	0.0493771
Ao3042_01325	AO1008_11560	Contig1208:21391-26185	0.0597012	0.0440185	0	0.0832028	0.150893	0.0882047
Ao3042_01326	AO1008_11559	Contig1208:27580-29192	0.0916414	0.135615	0	0	0	0
Ao3042_01327	AO1008_11558	Contig1208:30563-32327	71.9963	40.6757	19.8383	148.344	120.85	56.735
Ao3042_01328	AO1008_11557	Contig1208:32928-34542	26.0553	12.9894	16.3386	64.647	42.4462	42.5145
Ao3042_01329	AO1008_11556	Contig1208:35149-36989	53.5753	17.9427	8.14687	157.438	80.523	38.4234
Ao3042_01330	AO1008_11555	Contig1208:39775-44822	6.67194	6.13744	8.6083	8.11147	7.58971	6.24707
Ao3042_01331	AO1008_11554	Contig1208:39775-44822	366.501	140.939	70.0725	307.324	547.511	412.242
Ao3042_01332	AO1008_11553	Contig1208:45611-47701	53.4559	31.4012	33.7498	41.2762	52.6635	37.4373
Ao3042_01333	AO1008_11552	Contig1208:47831-50343	49.2258	63.2536	45.6831	202.473	99.534	78.2561
Ao3042_01334	AO1008_11551	Contig1208:51938-53637	13.3792	27.088	9.30742	7.95499	7.14557	4.95473
Ao3042_01335	AO1008_11550	Contig1208:54323-56379	42.4721	31.8467	54.396	44.8891	50.3854	39.515
Ao3042_01336	AO1008_11549	Contig1208:56514-60091	52.1546	56.9403	57.6989	109.804	79.28	82.0043
Ao3042_01337	AO1008_11548	Contig1208:56514-60091	0	1.46168	0	0	0	6.1989
Ao3042_01338	AO1008_11547	Contig1208:60656-61476	1.50234	20.1198	22.0452	2.98884	2.1576	2.60812
Ao3042_01339	AO1008_11546	Contig1208:63900-65730	6.40476	7.57743	12.091	13.2723	11.0634	12.0922
Ao3042_01340	AO1008_11545	Contig1208:66499-69101	25.2405	31.1933	28.8257	19.0982	16.2757	17.2689
Ao3042_01341	AO1008_11544	Contig1208:69535-70127	64.3962	39.5637	52.9519	48.6154	88.6613	132.329
Ao3042_01342	AO1008_11543	Contig1208:70437-72386	4.17301	4.65374	3.59274	6.27096	5.28821	6.14132
Ao3042_01343	AO1008_11542	Contig1208:73135-76238	136.678	135.836	157.911	172.583	154.286	113.227
Ao3042_01344	AO1008_11541	Contig1208:73135-76238	0	0	0	0	22.5137	0
Ao3042_01345	AO1008_11540	Contig1208:76994-77849	132.712	212.584	329.782	128.973	225.982	341.181
Ao3042_01346	AO1008_11539	Contig1208:80557-81394	26.3956	43.7343	28.943	71.2	26.8742	70.1233
Ao3042_01347	AO1008_11538	Contig1208:81524-82140	4.80317	5.67195	1.02021	6.60608	2.78718	6.45454
Ao3042_01348	AO1008_11537	Contig1208:82756-84962	64.8172	107.298	111.314	61.5009	63.0197	76.5696
Ao3042_01349	AO1008_11536	Contig1208:85726-86538	91.2736	84.6171	86.8785	161.282	111.238	80.0144
Ao3042_01350	AO1008_11535	Contig1208:86945-89422	0	0	0	2.41609	9.09445	0
Ao3042_01351	AO1008_11534	Contig1208:86945-89422	104.386	100.147	131.033	73.4014	90.0457	72.8395
Ao3042_01352	AO1008_11533	Contig1208:90703-92953	111.468	96.5002	87.49	103.808	100.337	55.0839
Ao3042_01353	AO1008_11532	Contig1208:98418-101660	31.8067	63.488	73.4224	46.5282	66.7872	68.4155
Ao3042_01354	AO1008_11531	Contig1208:105491-110157	9.21552	11.684	18.1848	11.6306	15.4143	17.2276
Ao3042_01355	AO1008_11530	Contig1208:105491-110157	11.2469	16.1231	20.8532	17.3754	17.4204	19.3766
Ao3042_01356	AO1008_11529	Contig1208:111504-113001	13.0663	20.0202	22.5782	31.8762	26.8138	35.6611
Ao3042_01357	AO1008_11528	Contig1208:114602-116015	53.8038	31.8447	39.8355	48.0102	56.9786	29.7678
Ao3042_01358	AO1008_11527	Contig1208:116318-121744	3.36339	4.72273	7.19559	3.49642	3.30523	3.02316
Ao3042_01359	AO1008_11526	Contig1208:121820-126541	0.0304412	0	0.344335	0	0	0
Ao3042_01360	AO1008_11525	Contig1208:127080-130934	7.55139	7.50758	5.63513	5.5556	6.79181	6.28734
Ao3042_01361	AO1008_11524	Contig1208:131662-133640	4.76266	6.11892	5.74804	3.34465	4.45375	9.94197
Ao3042_01362	AO1008_11523	Contig1208:133841-135426	43.7753	26.9987	26.8334	111.041	67.3722	49.7896
Ao3042_01363	AO1008_11522	Contig1208:135637-137130	250.772	236.794	242.54	590.192	238.997	419.553
Ao3042_01364	AO1008_11521	Contig1208:141328-144513	8.59469	12.5476	11.5505	13.3727	23.8926	47.1139
Ao3042_01365	AO1008_11520	Contig1208:141328-144513	36.8354	37.9612	41.8735	325.415	300.141	210.449
Ao3042_01366	AO1008_11519	Contig1208:144834-148795	13.0164	10.195	15.8356	10.4292	11.3195	9.05643
Ao3042_01367	AO1008_11518	Contig1208:144834-148795	41.8195	57.0531	56.3393	42.6303	62.5547	79.0604
Ao3042_01369	AO1008_11516	Contig1208:151831-152806	0.690881	0	0.436553	0	0.589595	0
Ao3042_01370	AO1008_11515	Contig1208:153109-155780	76.0148	78.8827	81.3911	89.4722	64.6844	67.42
Ao3042_01371	AO1008_11514	Contig1208:156956-159290	44.1613	62.1464	42.5051	39.5858	53.4447	68.2115
Ao3042_01372	AO1008_11513	Contig1208:159423-163173	40.7063	31.9256	28.2452	4.20746	16.4725	7.32507
Ao3042_01373	AO1008_11512	Contig1208:165946-167691	12.8162	10.5199	14.7519	10.8776	16.479	15.6038
Ao3042_01374	AO1008_11511	Contig1208:168030-169268	263.097	252.894	244.394	593.442	271.178	373.86
Ao3042_01375	AO1008_11510	Contig1208:169493-171848	242.395	268.896	281.977	604.87	242.443	482.052
Ao3042_01376	AO1008_11509	Contig1208:169493-171848	10.4732	14.3343	16.6689	16.638	17.2237	23.3028
Ao3042_01377	AO1008_11508	Contig1208:172006-173597	5.43382	5.17923	3.8263	8.66844	5.14149	7.09556
Ao3042_01378	AO1008_11507	Contig1208:176014-177099	2.46887	7.58234	31.4555	0.923521	1.25881	20.3883
Ao3042_01379	AO1008_11506	Contig1208:178094-178695	0.642468	0	0	0.615024	1.68969	0
Ao3042_01380	AO1008_11505	Contig1208:180651-182703	8.73935	3.07534	1.9635	13.8815	10.8085	10.4027
Ao3042_01381	AO1008_11504	Contig1208:183880-187063	13.5931	16.6742	15.022	15.3744	10.2391	13.2261
Ao3042_01382	AO1008_11503	Contig1208:188708-193599	1.00608	22.3889	56.4774	0.175545	1.2741	7.38117
Ao3042_01383	AO1008_11502	Contig1208:188708-193599	36.331	34.8608	31.0962	27.3603	38.8146	110.036
Ao3042_01384	AO1008_11501	Contig1208:194599-196269	29.7087	24.2417	119.769	4.17118	9.30444	25.5858
Ao3042_01385	AO1008_11500	Contig1208:197231-202234	11.4412	44.6146	36.6839	13.2135	46.5172	93.2606
Ao3042_01386	AO1008_11499	Contig1208:197231-202234	9.53511	9.66553	11.3361	13.4502	11.9015	14.4218
Ao3042_01387	AO1008_11498	Contig1208:202963-205063	189.107	65.0338	111.182	212.798	182.684	180.943
Ao3042_01389	AO1008_11496	Contig1208:205160-207101	23.8443	9.07886	15.7249	5.47222	11.2304	8.22414
Ao3042_01390	AO1008_11495	Contig1208:207450-211588	159.193	69.2781	70.8719	49.6932	85.1973	98.996
Ao3042_01391	AO1008_11494	Contig1208:207450-211588	19.9945	12.5158	22.2929	30.0738	35.3421	30.1926
Ao3042_01392	AO1008_11493	Contig1208:213021-216149	0	0.133897	0	0	0.114795	0
Ao3042_01393	AO1008_11492	Contig1208:218488-219331	12.5386	65.1446	26.1448	2.21101	22.0294	107.411
Ao3042_01394	AO1008_11491	Contig1208:221132-222998	0.260165	2.30937	4.58484	0.0807943	0.329976	1.02764
Ao3042_01395	AO1008_11490	Contig1208:223851-226522	0.774101	10.1252	35.779	0.0514358	1.04984	3.10786
Ao3042_01396	AO1008_11489	Contig1208:229316-229733	0	0	0	0	0	0
Ao3042_01397	AO1008_11488	Contig1208:232031-233171	0	0	0.292013	0	0	0
Ao3042_01398	AO1008_11487	Contig1208:234354-235143	0	0	0	0	0	0
Ao3042_01399	AO1008_11486	Contig1208:235748-238020	0	0	0	0	0	0
Ao3042_01400	#N/A	Contig1208:238728-240369	0	0	0.786121	0	0.396296	0
Ao3042_01401	AO1008_11484	Contig1208:242408-244448	0.353287	0.392034	0.667093	0.411458	0.3361	1.91891
Ao3042_01402	AO1008_11483	Contig1208:246295-247629	0.820369	0.405721	0.25852	2.68152	0.347947	3.92439
Ao3042_01403	AO1008_11482	Contig1208:247981-249127	0	0	0	0	0	0
Ao3042_01405	AO1008_11480	Contig1208:254688-256499	0.0914469	0.405978	0.345378	0	0.11602	1.08387
Ao3042_01406	AO1008_11479	Contig1208:257651-261960	11.3058	14.2382	34.3675	10.4462	11.8007	11.9813
Ao3042_01407	AO1008_11478	Contig1208:262919-263859	0.826868	0.307939	1.17482	0	0.528429	0
Ao3042_01408	AO1008_11477	Contig1208:267149-268424	0.373439	0.922789	44.9388	0	0.474792	4.80218
Ao3042_01409	AO1008_11476	Contig1208:268697-270568	1.56459	1.93375	0.739436	2.55628	1.16082	3.35416
Ao3042_01410	AO1008_11475	Contig1208:270619-271720	0	0	0	0	0	0
Ao3042_01411	AO1008_11474	Contig1208:272432-273492	0.159512	0	0	0	0.203261	0
Ao3042_01412	AO1008_11473	Contig1208:274590-275355	1.02053	1.82401	0.77326	1.14743	1.56499	1.21577
Ao3042_01413	AO1008_11472	Contig1208:275724-277245	0.711904	1.231	1.5696	1.10712	1.05558	1.99471
Ao3042_01414	AO1008_11471	Contig1208:277963-279088	0	0	0	0	0	0
Ao3042_01415	AO1008_11470	Contig1208:280386-281010	0	0	0	0	0	0
Ao3042_01416	AO1008_11469	Contig1208:284338-286252	5.71966	16.2029	15.8165	2.77612	3.26832	5.48748
Ao3042_01417	AO1008_11468	Contig1208:288666-289141	0	0	0	0	0	0
Ao3042_01418	AO1008_11467	Contig1208:290069-290621	0	0	0	0	0	0
Ao3042_01419	AO1008_11466	Contig1208:291892-292435	0	0	0	0	0	0
Ao3042_01420	AO1008_11465	Contig1208:294387-295797	0.515743	0.0936416	0.238743	0.117897	0.0803016	0.0624741
Ao3042_01422	AO1008_11463	Contig1208:299878-301710	11.0214	5.61911	6.45644	25.0555	18.4972	12.8289
Ao3042_01423	AO1008_11462	Contig1208:302869-306014	4.71767	2.40505	1.69852	6.45931	5.5329	3.55048
Ao3042_01424	AO1008_11461	Contig1208:306039-307944	9.88583	9.55348	8.08175	14.063	13.1235	11.2181
Ao3042_01425	AO1008_11460	Contig1208:309344-311098	0.0895459	0	0	0	0	0
Ao3042_01426	AO1008_11459	Contig1208:311776-313535	0	0	0.340308	0	0	0.0889943
Ao3042_01427	AO1008_11458	Contig1208:313812-315529	1.4026	0.518792	0.662103	29.158	11.0081	6.49275
Ao3042_01428	AO1008_11457	Contig1208:316170-316587	1.19577	5.46705	1.14497	20.5591	15.6782	23.5703
Ao3042_01429	AO1008_11456	Contig1208:317279-319593	0.192289	0	0.120949	0.119301	0.0811782	0.0632299
Ao3042_01430	AO1008_11455	Contig1208:319849-320971	6.83049	16.899	24.816	29.9082	58.0341	82.9019
Ao3042_01431	AO1008_11454	Contig1208:321960-323394	0.198484	0.734636	0.749799	0.277545	1.38571	3.03975
Ao3042_01432	AO1008_11453	Contig1208:323960-325673	2.6284	15.9287	46.9043	0.789846	1.2903	7.8696
Ao3042_01433	AO1008_11452	Contig1208:329974-331581	0	10.3443	35.1859	0	0.268772	2.19643
Ao3042_01434	AO1008_11451	Contig1208:336863-337833	2.79094	5.36721	11.4939	0.307052	2.72042	4.22992
Ao3042_01435	AO1008_11450	Contig1208:339361-340236	0.55192	0	2.1112	0	0	1.11345
Ao3042_01436	AO1008_11449	Contig1208:340331-341149	0.40821	0.608004	2.31978	1.33867	0.521665	1.82365
Ao3042_01437	AO1008_11448	Contig1208:341994-343184	0.540594	2.94827	2.38783	0	3.21897	38.599
Ao3042_01438	AO1008_11447	Contig1208:345108-346933	5.80266	10.1274	10.57	3.67139	7.10454	10.2401
Ao3042_01439	AO1008_11446	Contig1208:348119-349373	1.01169	3.00338	2.18659	1.48528	0.735955	2.43258
Ao3042_01440	AO1008_11445	Contig1208:349547-350729	1.10751	1.82434	1.86067	1.26333	2.34662	1.09546
Ao3042_01441	AO1008_11444	Contig1208:352342-353446	13.0272	3.5493	5.27758	26.3138	40.0768	20.7837
Ao3042_01442	AO1008_11443	Contig1208:353656-355350	21.1443	7.08029	8.87203	66.2321	109.923	67.9676
Ao3042_01443	AO1008_11442	Contig1208:358474-360867	11.1903	14.7891	22.3354	20.4943	24.6074	26.081
Ao3042_01444	AO1008_11441	Contig1208:362120-366326	10.8655	13.4257	20.0213	8.45858	9.76679	13.8327
Ao3042_01445	AO1008_11440	Contig1208:366680-369657	6.46104	17.7012	10.7833	17.6343	19.464	33.1261
Ao3042_01446	AO1008_11439	Contig1208:370223-372039	174.074	375.896	192.266	21.1224	84.2746	137.751
Ao3042_01447	AO1008_11438	Contig1208:373195-373918	0.437213	0.977621	0.414265	0	0	0.868669
Ao3042_01448	AO1008_11437	Contig1208:374438-375362	0.670317	2.49075	1.58561	0.313475	0.427304	2.32527
Ao3042_01449	AO1008_11436	Contig1208:377028-379221	1.63565	1.49723	2.05841	5.07736	2.96197	1.76831
Ao3042_01450	AO1008_11435	Contig1208:380616-382698	1.89304	2.69433	1.7202	5.02565	4.79692	4.77367
Ao3042_01451	AO1008_11434	Contig1208:382740-384396	13.3219	18.4498	21.8949	21.1113	23.7981	22.8034
Ao3042_01452	AO1008_11433	Contig1208:385130-386672	5.22356	5.56023	2.59586	49.7018	18.8355	10.3187
Ao3042_01453	AO1008_11432	Contig1208:386822-387563	142.138	103.689	155.154	613.852	939.066	687.896
Ao3042_01454	AO1008_11431	Contig1208:387906-389548	4.65166	174.046	641.068	5.39742	14.4373	37.0819
Ao3042_01455	AO1008_11430	Contig1208:390283-392098	8.14691	5.93978	9.18982	14.2868	15.2826	15.7065
Ao3042_01456	AO1008_11429	Contig1208:394188-395998	12.9674	17.4209	32.1298	23.2256	19.1363	30.1584
Ao3042_01459	AO1008_10695	Contig121:6389-7235	0	0	0	0	0	0
Ao3042_01460	AO1008_10694	Contig121:7364-9919	0.187273	0	0	0.11618	0.474313	0.123152
Ao3042_01461	AO1008_10693	Contig121:10361-11467	13.2069	3.78217	2.10729	46.8605	20.6811	55.6487
Ao3042_01462	AO1008_10692	Contig121:12306-15017	21.6284	21.3611	10.4046	5.58722	27.3874	28.6458
Ao3042_01463	AO1008_10691	Contig121:17565-18944	0.671561	6.77445	1.26968	0.376261	1.02524	5.31673
Ao3042_01464	AO1008_10690	Contig121:19342-20293	34.5493	10.3113	108.937	0	2.01005	6.87668
Ao3042_01465	AO1008_10689	Contig121:20511-21517	0.739167	2.19477	1.95722	0	0	0.439166
Ao3042_01467	AO1008_09817	Contig123:1882-2824	1.40247	4.17087	5.64092	1.1482	2.68341	4.17149
Ao3042_01468	AO1008_09816	Contig123:8627-10470	1.98926	1.53544	0.32661	0.56404	1.42605	1.45191
Ao3042_01469	AO1008_09815	Contig123:11954-14489	0.0537744	2.06455	2.53607	0.0500195	0.204181	0.795341
Ao3042_01470	AO1008_09814	Contig123:14795-15458	0.243301	4.35844	2.30688	0	0	0.725913
Ao3042_01471	AO1008_09813	Contig123:16251-18207	4.53394	17.068	20.0557	0.329752	0.897613	3.84486
Ao3042_01472	AO1008_09812	Contig123:19544-21154	0	0.134181	0	0	0	0.0895586
Ao3042_01473	AO1008_09811	Contig123:21820-22336	0.672812	0.504906	0.639575	0.317236	0	0.335991
Ao3042_01474	AO1008_09810	Contig123:24881-26519	2.73803	2.3205	2.46479	0.608638	0.99499	3.48317
Ao3042_01475	AO1008_09809	Contig123:27570-29918	62.3156	61.6771	22.2574	59.1559	175.206	804.505
Ao3042_01476	AO1008_09808	Contig123:30689-31714	4.63004	4.29539	3.83084	3.51462	6.07849	9.88454
Ao3042_01477	AO1008_09807	Contig123:34452-35693	5.47603	0.690659	0.660516	0.217408	0.148057	0.345627
Ao3042_01478	AO1008_09806	Contig123:37534-38534	3.19229	0.499458	0	0.314296	0	0
Ao3042_01479	AO1008_09805	Contig123:38930-41996	0.396384	0	0	0	0.222835	0
Ao3042_01480	AO1008_09804	Contig123:42546-44332	5.1316	0.124438	0.15883	0.15673	0.426722	0
Ao3042_01481	AO1008_09803	Contig123:44632-45496	4.05964	1.57487	1.33638	1.65158	1.8013	4.0252
Ao3042_01482	AO1008_09802	Contig123:45656-46706	3.94097	4.17748	5.32303	3.68121	2.86617	3.48322
Ao3042_01483	AO1008_09801	Contig123:47167-48697	6.11781	5.46761	8.16987	1.96719	4.15227	3.12746
Ao3042_01484	AO1008_09800	Contig123:50333-54184	45.7772	28.2156	21.6943	35.6167	63.2027	75.7828
Ao3042_01486	AO1008_09798	Contig123:50333-54184	30.351	0	0	2.07685	32.1585	3.37136
Ao3042_01487	AO1008_09797	Contig123:55850-56627	3.56572	0.820382	1.56173	0.515746	3.169	1.36586
Ao3042_01488	AO1008_09796	Contig123:60799-62670	5.49859	6.48123	8.69565	4.77378	5.1793	4.54675
Ao3042_01489	AO1008_09795	Contig123:62892-64080	0.244716	0.906951	0.462516	0.114192	0.311091	0.242045
Ao3042_01490	AO1008_09794	Contig123:65635-67030	1.6814	0.38363	0.977992	0.36224	0.164493	0.127967
Ao3042_01491	AO1008_09793	Contig123:72437-74589	2.05607	1.4033	1.34355	0.662829	1.00251	2.10771
Ao3042_01492	AO1008_09792	Contig123:75070-77123	3.50927	2.36975	1.20715	2.08787	2.84566	3.0027
Ao3042_01493	AO1008_09791	Contig123:77141-79783	2.28616	1.38089	0.686083	0.531585	0.723296	0.870871
Ao3042_01494	AO1008_09790	Contig123:80019-81624	18.4864	13.8224	5.93888	1.77629	3.02316	9.97831
Ao3042_01495	AO1008_09789	Contig123:82161-82820	14.1726	17.1173	4.65533	1.2811	0.349844	9.77119
Ao3042_01496	AO1008_09788	Contig123:83071-84941	11.5142	22.2061	6.60248	1.74803	2.81235	5.38997
Ao3042_01497	AO1008_09787	Contig123:90278-92028	156.369	51.7293	70.7079	18.1484	16.1995	33.5062
Ao3042_01498	AO1008_09786	Contig123:93071-95154	47.3711	40.0684	47.3185	3.55087	5.96494	18.4985
Ao3042_01499	AO1008_09785	Contig123:96232-98702	612.738	611.176	398.3	105.561	150.803	419.132
Ao3042_01500	AO1008_09784	Contig123:103037-104970	10.1888	5.37271	4.77123	3.75142	6.40815	5.92555
Ao3042_01501	AO1008_09783	Contig123:105056-105641	0	0	0	0	0	0
Ao3042_01502	AO1008_09782	Contig123:108094-108817	0	0	0	0	0	0
Ao3042_01503	AO1008_09781	Contig123:110038-110879	24.7106	16.4088	23.7717	27.695	35.4241	48.0587
Ao3042_01504	AO1008_09780	Contig123:111382-112518	4.76169	10.8786	42.5733	2.04241	5.40101	6.49364
Ao3042_01505	AO1008_09779	Contig123:114424-115798	4.36447	3.23367	6.72797	3.42879	4.52403	6.47304
Ao3042_01506	AO1008_09778	Contig123:116852-118817	3.82984	7.2658	7.54505	2.71439	2.21707	4.52117
Ao3042_01507	AO1008_09777	Contig123:120610-125031	0.0529807	0.391151	0.799547	0.0985587	0.402315	0.261191
Ao3042_01508	AO1008_09776	Contig123:128475-128892	0	0	0	0	0	0
Ao3042_01509	AO1008_09775	Contig123:129358-131079	7.71562	11.1626	10.2453	7.81948	9.24715	8.62307
Ao3042_01510	AO1008_09774	Contig123:132407-133493	2.37382	92.7525	74.7658	0.95162	2.37823	3.0252
Ao3042_01511	AO1008_09773	Contig123:138307-140694	3.04982	3.91686	3.03028	1.27074	3.05257	3.96157
Ao3042_01512	AO1008_09772	Contig123:143030-144925	11.0909	5.84043	4.58854	6.64922	7.99148	4.94857
Ao3042_01513	AO1008_09771	Contig123:145552-146772	5.81923	6.51273	8.75297	3.32442	4.9809	27.1296
Ao3042_01514	AO1008_09770	Contig123:147463-149085	3.72903	3.20746	2.78365	2.18145	4.17969	12.5886
Ao3042_01515	AO1008_09769	Contig123:149770-151489	6.4323	8.30904	7.37829	4.01937	5.47144	18.3275
Ao3042_01516	AO1008_09768	Contig123:154014-162096	22.6625	8.75256	6.83717	41.2705	26.6128	28.1058
Ao3042_01517	AO1008_09767	Contig123:165315-167718	57.4762	34.2861	24.6004	14.2527	24.6507	19.3178
Ao3042_01518	AO1008_09766	Contig123:168241-170828	24.9409	10.4686	15.5312	5.52112	8.8628	14.761
Ao3042_01519	AO1008_00468	Contig125:3156-4634	26.6396	27.1818	39.8241	34.7182	29.0328	38.5591
Ao3042_01520	AO1008_00467	Contig125:4791-8786	18.0669	23.0229	25.4113	17.0304	13.7422	18.886
Ao3042_01521	AO1008_00466	Contig125:9175-9922	38.9033	37.5044	40.9777	24.2691	26.8476	60.85
Ao3042_01523	AO1008_00464	Contig125:11013-11781	23.7338	19.8494	26.4309	14.0701	13.1127	19.9819
Ao3042_01524	AO1008_00463	Contig125:12690-14434	54.4845	34.2429	37.1758	59.2975	42.7351	38.7054
Ao3042_01525	AO1008_00462	Contig125:14918-18018	53.4407	42.9932	51.2176	39.6668	47.9321	39.6983
Ao3042_01527	AO1008_01064	Contig126:4496-7105	0	0.163732	0	0	0	0
Ao3042_01528	AO1008_01065	Contig126:8532-9606	0.33386	0	0	0	0	0
Ao3042_01529	AO1008_01066	Contig126:12109-16702	0	0	0	0.0284854	0	0
Ao3042_01530	#N/A	Contig126:21674-23582	1.60066	0	0.137325	0.0677389	0.184397	0
Ao3042_01531	AO1008_10917	Contig126:25900-27653	12.5567	27.4857	18.2615	21.2609	22.1648	9.63404
Ao3042_01532	AO1008_10918	Contig126:28088-29303	1.07377	2.8294	1.57832	2.22657	3.9426	4.01164
Ao3042_01533	AO1008_10919	Contig126:29491-32286	0.730541	3.37834	3.104	1.02114	2.31711	2.16466
Ao3042_01534	AO1008_10920	Contig126:33227-34578	0.12705	2.07236	0.720468	0	0	0
Ao3042_01535	AO1008_10921	Contig126:38496-40117	16.0057	30.0703	18.1684	20.5278	27.9476	23.2676
Ao3042_01536	AO1008_10922	Contig126:41234-42508	3.59951	1.47218	0.234601	3.01201	5.36535	0.122776
Ao3042_01537	AO1008_10923	Contig126:42578-43283	5.78427	0.481885	1.83208	4.5422	15.7239	0
Ao3042_01538	AO1008_10924	Contig126:45240-45879	2.03852	8.37418	1.45009	0	0	0.760666
Ao3042_01539	AO1008_03256	Contig128:2777-8420	18.7971	23.8472	13.7737	1.62985	4.64591	6.8878
Ao3042_01540	AO1008_03255	Contig128:10813-11972	10.2546	11.7659	6.20447	0.766147	4.52331	4.19504
Ao3042_01541	AO1008_03254	Contig128:12457-13434	1.36645	4.18595	2.62302	0	0	0
Ao3042_01546	AO1008_11270	Contig128:27490-28448	4.84911	1.16172	10.3571	66.9704	7.37355	3.09909
Ao3042_01547	AO1008_11271	Contig128:29204-31027	0.405374	1.65062	0.765719	0.0944836	0.514632	0.801137
Ao3042_01548	AO1008_11272	Contig128:31294-31987	0.558047	1.66956	1.58892	0	0.358303	0.833851
Ao3042_01549	AO1008_11273	Contig128:33200-35162	2.62201	5.21108	2.47506	2.97647	3.42846	2.34596
Ao3042_01550	AO1008_11274	Contig128:38709-41083	20.7995	18.8603	15.5106	26.6567	28.3111	20.2095
Ao3042_01551	AO1008_11275	Contig128:42947-43695	1.60348	2.39173	0	0.644667	0.586413	0.455338
Ao3042_01552	AO1008_11276	Contig128:43760-44327	2.37338	3.05375	1.93397	1.91864	0	0.677354
Ao3042_01553	AO1008_11277	Contig128:46754-47866	0.659228	0.782247	0.747764	0.369307	1.50938	1.30463
Ao3042_01554	AO1008_11278	Contig128:49677-51364	1.20478	2.52704	11.7577	1.87197	2.03921	18.2536
Ao3042_01555	AO1008_11279	Contig128:53795-54245	0	0	0	0	0	0.72916
Ao3042_01556	AO1008_11280	Contig128:54823-56480	0.195334	0.144582	0.737867	0.455199	0.495846	0.675452
Ao3042_01557	AO1008_11281	Contig128:57108-59053	0.0908682	0	0	0	0	0.0897483
Ao3042_01558	AO1008_11282	Contig128:59374-61100	0.0899197	0.532217	1.35838	0	0.456287	0.355231
Ao3042_01560	AO1008_11284	Contig128:63958-66039	44.275	62.1244	35.33	39.826	44.5863	88.3611
Ao3042_01561	AO1008_11285	Contig128:66965-68879	4.23794	7.98918	5.33408	5.57308	4.63629	13.127
Ao3042_01562	AO1008_11286	Contig128:70044-70957	12.5835	17.132	11.4062	13.4333	17.8618	12.1257
Ao3042_01563	AO1008_11287	Contig128:71169-72282	13.0394	10.9402	4.482	8.11642	12.5652	13.5542
Ao3042_01564	AO1008_11288	Contig128:72837-74066	30.853	19.1586	9.74338	39.969	51.5092	11.917
Ao3042_01565	AO1008_11289	Contig128:74790-76974	11.8584	13.6681	6.94786	5.40838	10.8879	8.2356
Ao3042_01566	AO1008_11290	Contig128:77026-80309	8.72733	3.80923	1.59296	1.96337	4.74884	6.24388
Ao3042_01567	AO1008_11291	Contig128:80571-81108	4.78453	1.43475	2.42452	3.60643	2.0533	2.8649
Ao3042_01568	AO1008_11292	Contig128:84600-87566	7.18155	6.90437	6.23794	6.41438	8.66725	7.82425
Ao3042_01569	AO1008_11293	Contig128:87833-89913	2.95691	3.49707	1.53482	3.16608	3.27887	1.96981
Ao3042_01570	AO1008_11294	Contig128:90427-91978	4.76452	1.69254	2.33956	6.48345	2.41853	6.30705
Ao3042_01571	AO1008_11295	Contig128:92232-94119	0.767616	63.5903	11.5946	0	10.6004	1.01062
Ao3042_01572	AO1008_11296	Contig128:96007-97650	0.481781	1.28368	0.181984	0.538874	1.71202	1.04712
Ao3042_01573	AO1008_11297	Contig128:99201-101464	149.351	138.217	38.6304	388.147	544.207	737.633
Ao3042_01574	AO1008_11298	Contig128:104192-106141	7.3901	14.7104	19.887	2.72495	11.9612	40.7263
Ao3042_01575	AO1008_11299	Contig128:106368-108105	0.399732	4.73458	6.22901	0	0.380567	1.57987
Ao3042_01576	AO1008_11300	Contig128:110329-111904	0.179092	0.662492	0.33818	0.166874	0	0
Ao3042_01577	AO1008_11301	Contig128:113185-114758	2.86945	5.70538	4.57179	3.67635	3.86761	6.99626
Ao3042_01578	AO1008_08018	Contig130:4557-4949	0	1.16146	0	0	0	0
Ao3042_01579	AO1008_08019	Contig130:6319-9112	3.36136	3.98741	5.50964	5.07472	6.48672	7.82458
Ao3042_01580	AO1008_08020	Contig130:9618-11111	59.8595	32.926	31.0186	120.317	106.546	130.941
Ao3042_01582	AO1008_08022	Contig130:12814-15269	13.776	25.7989	21.8958	12.1848	14.7083	21.6113
Ao3042_01583	AO1008_08023	Contig130:15447-17469	35.1225	51.3866	44.4394	26.5443	34.3754	37.2636
Ao3042_01584	AO1008_08024	Contig130:20123-22499	57.175	56.9117	65.2362	51.8785	64.5447	57.3784
Ao3042_01585	AO1008_08025	Contig130:22611-27924	30.4085	24.2065	30.7905	47.5261	31.8043	26.6852
Ao3042_01586	AO1008_08026	Contig130:22611-27924	30.0372	12.875	7.97444	16.2572	14.5709	11.3008
Ao3042_01587	AO1008_08027	Contig130:30532-35717	8.79726	7.26341	7.58314	13.4093	13.6916	10.5163
Ao3042_01590	AO1008_08030	Contig130:30532-35717	656.548	837.781	936.686	1830.04	1543.89	1278.36
Ao3042_01591	AO1008_08031	Contig130:36298-38499	113.293	23.6264	25.7577	78.3991	242.121	58.9932
Ao3042_01592	AO1008_08032	Contig130:38685-40107	5.03426	5.90233	4.16072	1.76036	4.12852	3.93883
Ao3042_01593	AO1008_08033	Contig130:41110-46317	0.0267378	0.0394213	0.201609	0	0	0
Ao3042_01594	AO1008_08034	Contig130:46722-48754	0	0.23374	0	0	0.100189	0
Ao3042_01597	AO1008_08037	Contig130:53139-55806	2.87152	5.34901	3.76924	4.35673	5.21744	7.01965
Ao3042_01598	AO1008_08038	Contig130:58298-60036	2.62099	7.8847	20.9505	0.895375	3.76769	5.34912
Ao3042_01599	AO1008_08039	Contig130:63851-67558	11.978	24.7723	21.5743	14.8616	21.9692	32.1076
Ao3042_01600	AO1008_08040	Contig130:63851-67558	3.03697	7.55565	6.78219	1.58757	3.29897	2.89455
Ao3042_01602	AO1008_08042	Contig130:73014-74155	0.145503	0	0	0.135944	0	0
Ao3042_01603	AO1008_08043	Contig130:75135-75732	0	0	0	0	0	0
Ao3042_01604	AO1008_08044	Contig130:78428-78903	0.956739	1.44789	0	0	2.48925	2.40451
Ao3042_01605	AO1008_08045	Contig130:86030-87803	5.91892	5.65953	6.70632	12.219	11.5527	8.72407
Ao3042_01606	AO1008_08046	Contig130:88766-90388	23.0257	21.9129	28.6459	31.0475	38.2606	45.1259
Ao3042_01607	AO1008_08047	Contig130:90635-92924	12.3773	9.41693	10.8598	18.428	19.9839	14.3453
Ao3042_01608	AO1008_08048	Contig130:92924-95487	23.1333	17.7985	22.7635	26.8824	18.7142	18.5682
Ao3042_01609	AO1008_08049	Contig130:92924-95487	0	5.65158	3.4234	6.37056	8.267	1.35638
Ao3042_01610	AO1008_08050	Contig130:96762-98007	14.2684	17.0489	45.957	20.3537	12.7721	15.557
Ao3042_01611	AO1008_08051	Contig130:98084-100332	0.267255	3.85062	4.41302	19.8378	18.0272	36.7826
Ao3042_01612	AO1008_08052	Contig130:100786-102232	1.47504	5.82312	7.61507	59.3998	49.9263	56.0596
Ao3042_01613	AO1008_08053	Contig130:102933-105119	0.846864	0.20862	0.532769	0.197092	0.0894166	0.41783
Ao3042_01614	AO1008_08054	Contig130:108810-112628	4.30825	1.15407	2.46781	7.2369	7.34132	4.74758
Ao3042_01615	AO1008_08055	Contig130:108810-112628	2.1866	3.19839	2.86229	6.27783	2.13527	2.17188
Ao3042_01616	AO1008_08056	Contig130:112645-113865	3.44403	7.2168	7.18192	15.9572	8.30151	5.51988
Ao3042_01618	AO1008_08058	Contig130:117118-117946	1.29944	0.276196	1.40585	0	0.47389	1.28895
Ao3042_01620	AO1008_08060	Contig130:125234-127833	43.0197	43.9052	101.367	4.63441	42.7853	11.9911
Ao3042_01621	AO1008_08061	Contig130:127994-132325	22.4655	40.7092	128.859	1.11517	35.1986	3.18287
Ao3042_01624	AO1008_08064	Contig130:147254-149256	0.531748	1.18016	5.35509	0.49545	1.46145	4.72628
Ao3042_01625	AO1008_08065	Contig130:149791-156336	0.0429459	0.316495	0.364247	0	0.108487	0.021142
Ao3042_01626	AO1008_08066	Contig130:159078-161253	0	0	0	0	0	0
Ao3042_01627	AO1008_08067	Contig130:166417-169895	10.9583	3.82473	150.796	0.146036	0.297995	2.82531
Ao3042_01628	AO1008_08068	Contig130:174731-178654	0.103793	0.102065	0	0.546587	0.349885	0.238592
Ao3042_01629	AO1008_08069	Contig130:179357-181200	0.396612	0	0.149743	1.84686	1.20672	0.469824
Ao3042_01630	AO1008_08070	Contig130:181287-182348	0	0	0	1.1609	0.452198	0.351469
Ao3042_01631	AO1008_08071	Contig130:182849-184394	0.731575	0.405978	0.518067	0.681729	0.464081	0.903223
Ao3042_01632	AO1008_08072	Contig130:184988-188077	0	0	0	0	0.0588462	0
Ao3042_01633	AO1008_08073	Contig130:190363-191146	2.38155	2.06852	2.63118	0.929504	1.52118	2.36371
Ao3042_01634	AO1008_08074	Contig130:193208-194134	2.14359	0.58019	0.369045	2.37257	2.98661	2.90069
Ao3042_01636	AO1008_08076	Contig130:198855-199901	1.21749	6.32787	11.2269	1.2801	6.59037	4.67258
Ao3042_01637	AO1008_08077	Contig130.1:509-2281	0	0	0	0	0	0
Ao3042_01638	AO1008_08078	Contig130.1:4238-6058	0	0	0	0	0	0
Ao3042_01639	AO1008_08079	Contig130.1:6732-7580	23.0294	29.5433	118.306	27.4384	48.052	78.5124
Ao3042_01640	AO1008_08080	Contig130.1:8115-8912	105.987	68.914	113.863	138.771	231.053	227.19
Ao3042_01641	AO1008_08081	Contig130.1:9217-10923	5.28149	5.39003	2.92327	0.933397	3.11923	2.60823
Ao3042_01642	AO1008_08082	Contig130.1:11839-12798	11.6094	8.63732	9.21785	1.5777	1.67321	4.0865
Ao3042_01643	AO1008_08083	Contig130.1:15733-17897	0.700151	0	1.99745	1.32139	1.35486	1.04959
Ao3042_01644	AO1008_08084	Contig130.1:18065-19727	59.1202	79.0925	111.801	76.3593	67.1343	47.897
Ao3042_01645	AO1008_08085	Contig130.1:19833-27418	22.4064	34.3605	30.4099	16.9966	20.6621	17.8645
Ao3042_01646	AO1008_08086	Contig130.1:19833-27418	60.6646	38.9658	40.7345	46.33	45.8375	40.2727
Ao3042_01647	AO1008_08087	Contig130.1:29231-32989	3.90615	2.41122	2.6307	4.96478	4.93949	6.55923
Ao3042_01648	AO1008_08088	Contig130.1:33379-34639	0.415459	0.41098	0.785571	1.81082	0.881154	3.8381
Ao3042_01649	AO1008_08089	Contig130.1:34803-37215	0.7746	0.936735	0.93031	0.327769	1.24909	1.25075
Ao3042_01650	AO1008_08090	Contig130.1:37392-38596	1.92467	2.66392	1.45529	0.359345	2.12128	4.8239
Ao3042_01651	AO1008_08091	Contig130.1:41033-41497	0	0	0	0	0	0
Ao3042_01652	AO1008_08092	Contig130.1:45574-47115	1.35247	23.5722	45.595	0.291019	1.84938	3.80416
Ao3042_01654	AO1008_05456	Contig131:1635-4214	30.2057	22.1384	21.9012	35.859	34.8124	30.2315
Ao3042_01655	AO1008_05455	Contig131:4378-5926	687.449	1004.92	905.109	1426.86	1068.87	923.45
Ao3042_01656	AO1008_05454	Contig131:5978-8034	3.63843	2.03809	3.9004	4.39998	6.3656	5.05216
Ao3042_01658	AO1008_05452	Contig131:8252-14785	1008.17	148.612	665.807	40.8358	379.479	75.0213
Ao3042_01659	AO1008_05451	Contig131:8252-14785	48.1626	14.1624	41.0461	6.28785	22.2079	12.2602
Ao3042_01660	AO1008_05450	Contig131:16395-18028	12.6547	31.8384	17.8796	2.88719	11.5732	26.6921
Ao3042_01661	AO1008_05449	Contig131:18249-19748	0.230323	0.853256	1.52329	0.429751	0.731647	3.98536
Ao3042_01662	AO1008_05448	Contig131:21631-22930	20.4875	43.9896	53.0135	53.7598	36.537	52.0273
Ao3042_01663	AO1008_05447	Contig131:24082-25647	17.5476	24.7211	18.962	20.2893	25.9576	35.9651
Ao3042_01664	AO1008_05446	Contig131:25652-29352	50.983	76.2664	90.1878	48.6771	47.325	112.859
Ao3042_01665	AO1008_05445	Contig131:29787-33929	28.48	34.8669	34.3378	27.8925	30.5423	29.4725
Ao3042_01666	AO1008_05444	Contig131:34262-35218	60.8616	31.5893	54.3727	109.409	89.5291	101.782
Ao3042_01667	AO1008_05443	Contig131:35426-38518	13.1282	16.9951	21.7175	17.2054	15.6429	20.977
Ao3042_01668	AO1008_05442	Contig131:40795-43185	44.1295	51.6967	74.8234	25.8534	27.3906	17.1664
Ao3042_01669	AO1008_05441	Contig131:44257-47669	104.614	140.832	151.811	67.7985	89.0879	97.2616
Ao3042_01670	AO1008_05440	Contig131:47845-49488	87.5287	63.8528	72.8842	102.14	89.8514	99.85
Ao3042_01671	AO1008_05439	Contig131:49895-55249	41.6947	30.7009	27.8338	59.2822	61.4281	38.8905
Ao3042_01672	AO1008_05438	Contig131:49895-55249	1592.81	2406.19	3459.62	356.763	606.435	2150.17
Ao3042_01673	AO1008_05437	Contig131:57738-58831	13.983	7.57938	11.1848	30.0069	27.3684	15.4347
Ao3042_01674	AO1008_05436	Contig131:59556-60227	389.76	441.366	375.857	906.166	374.999	629.114
Ao3042_01675	AO1008_05435	Contig131:60731-61776	30.3406	67.0179	99.0932	16.1806	22.6147	37.9584
Ao3042_01676	AO1008_05434	Contig131:61943-68934	18.0987	15.5002	15.8795	24.2569	27.7284	20.8033
Ao3042_01677	AO1008_05433	Contig131:71240-76471	21.1556	19.1333	18.1413	24.9465	22.666	18.4722
Ao3042_01678	AO1008_05432	Contig131:77135-81072	7.11948	6.16863	5.31217	10.7508	5.00474	16.7404
Ao3042_01679	AO1008_05431	Contig131:77135-81072	12.8911	17.3824	27.17	12.0944	20.1225	37.0688
Ao3042_01680	AO1008_05430	Contig131:81318-83413	9.22479	12.4898	11.2966	5.44096	10.2604	18.8307
Ao3042_01682	AO1008_05428	Contig131:86904-88821	42.5656	35.848	20.9046	3.30242	14.0349	29.7185
Ao3042_01683	AO1008_05427	Contig131:89041-90442	51.1988	48.0191	46.5474	58.3088	58.9124	85.6759
Ao3042_01684	AO1008_05426	Contig131:90633-95475	53.3797	84.4041	57.8603	27.0164	34.6731	25.5193
Ao3042_01685	AO1008_05425	Contig131:96406-97181	6.33959	12.3832	5.38545	3.68946	6.99064	10.6412
Ao3042_01686	AO1008_05424	Contig131:98005-98991	87.2011	61.6584	54.2048	161.167	164.702	158.816
Ao3042_01687	AO1008_05423	Contig131:99151-100448	12.8657	11.5019	20.9558	34.7597	26.4875	24.2313
Ao3042_01688	AO1008_05422	Contig131:100877-101207	87.3941	79.7703	86.3096	115.557	111.564	113.018
Ao3042_01689	AO1008_05421	Contig131:101414-105853	19.0991	13.8559	14.9664	20.1329	22.7853	17.9622
Ao3042_01690	AO1008_05420	Contig131:107059-108331	16.7772	11.1383	13.7259	35.8769	30.8831	27.743
Ao3042_01691	AO1008_05419	Contig131:109625-110665	1.16647	0.436547	0	0	1.12434	0.581324
Ao3042_01692	AO1008_05418	Contig131:112399-113122	100.122	86.3565	124.28	68.8699	71.3045	100.331
Ao3042_01693	AO1008_05417	Contig131:118840-121552	60.2822	62.6118	51.3973	40.7753	46.4709	55.2417
Ao3042_01694	AO1008_05416	Contig131:122544-124184	185.295	212.592	175.565	441.446	205.754	366.34
Ao3042_01695	AO1008_05415	Contig131:124517-128818	27.5769	15.2161	23.7743	14.9129	16.26	13.1431
Ao3042_01696	AO1008_05414	Contig131:130362-130943	0.9162	0.457546	0	1.43781	1.57138	0.609184
Ao3042_01697	AO1008_05413	Contig131:131681-134572	10.0134	10.2764	7.3748	11.4398	13.1513	13.396
Ao3042_01698	AO1008_05412	Contig131:137558-139481	375.359	500.306	306.359	246.877	552.445	531.858
Ao3042_01699	AO1008_05411	Contig131:139608-141074	58.9903	90.9355	153.264	47.7274	65.7233	87.9329
Ao3042_01700	AO1008_05410	Contig131:141275-142244	5.24849	11.4632	44.678	3.75148	4.12945	6.26907
Ao3042_01701	AO1008_05409	Contig131:143978-146547	28.8359	37.1912	43.8453	24.9143	28.1193	32.2663
Ao3042_01702	AO1008_05408	Contig131:146639-148582	5.8227	3.89258	4.81845	12.8516	9.50539	5.74806
Ao3042_01703	AO1008_05407	Contig131:148973-151001	33.7356	60.13	73.1836	14.9713	44.9821	60.2505
Ao3042_01704	AO1008_05406	Contig131:153623-158305	0.558004	0.0871753	0.000265969	0.439068	1.28727	1.4726
Ao3042_01705	AO1008_05405	Contig131:153623-158305	7.44016	9.91778	7.50303	11.0587	17.7332	25.0717
Ao3042_01708	AO1008_07015	Contig132:2281-4251	0.501808	0.742259	0.315805	0	0.424223	0
Ao3042_01709	AO1008_07014	Contig132:5273-6852	707.6	810.355	203.02	13.8953	60.8308	42.1556
Ao3042_01710	AO1008_07013	Contig132:8119-9535	3.68877	1.71698	0.398204	0.491393	0.133834	0
Ao3042_01712	AO1008_07011	Contig132:14042-16160	0	0	0	0	0	0
Ao3042_01713	#N/A	Contig132:18355-20272	0.145013	0	0	0	0	0
Ao3042_01714	AO1008_07009	Contig132:22570-23627	0.169558	0	0	0.317207	0.432405	0.336134
Ao3042_01715	AO1008_07008	Contig132:26285-27473	23.3704	2.35807	0.925032	16.4436	20.2209	4.8409
Ao3042_01716	AO1008_07007	Contig132:28119-28892	0.82813	1.23859	1.57182	1.29774	0.708816	0.274944
Ao3042_01718	AO1008_07005	Contig132:42792-43847	18.0919	23.2823	12.8327	15.2168	23.809	14.4833
Ao3042_01719	AO1008_07004	Contig132:44451-46443	0.416831	0.821418	0.393335	1.4874	1.84834	0.754043
Ao3042_01720	AO1008_07003	Contig132:47452-48581	6.0911	4.99727	5.87976	21.5363	9.88953	8.0782
Ao3042_01721	AO1008_07002	Contig132:49695-50910	0	0.176838	0	0	0	0
Ao3042_01722	AO1008_07001	Contig132:52592-55242	123.053	74.2484	37.6253	137.83	308.851	529.471
Ao3042_01723	AO1008_07000	Contig132:56068-56559	10.075	9.73419	14.3753	2.37795	2.78694	4.31718
Ao3042_01724	AO1008_06999	Contig132:56993-60226	13.3194	11.004	6.04228	3.06193	3.29088	2.13517
Ao3042_01725	AO1008_06998	Contig132:60510-63454	69.9813	98.6222	99.8148	76.8872	101.765	61.964
Ao3042_01726	AO1008_06997	Contig132:60510-63454	4.34638	1.89566	1.19672	6.3451	9.58488	5.46395
Ao3042_01727	AO1008_06996	Contig132:63719-65657	14.0106	8.27863	12.6948	14.9397	15.2764	16.7081
Ao3042_01728	AO1008_06995	Contig132:63719-65657	13.4068	12.7182	14.5372	18.0183	20.0201	27.2971
Ao3042_01729	AO1008_06994	Contig132:67143-67937	170.719	157.396	222.189	209.92	185.423	204.381
Ao3042_01730	AO1008_06993	Contig132:68495-71524	117.724	92.6507	89.436	169.819	139.718	134.49
Ao3042_01732	AO1008_06991	Contig132:76735-79140	263.224	223.964	146.564	226.056	252.784	196.052
Ao3042_01733	AO1008_06990	Contig132:80292-81117	16.0336	34.6756	27.1803	8.55219	14.9929	20.3433
Ao3042_01734	AO1008_06989	Contig132:81182-82415	4.62618	9.09004	11.5077	1.0077	10.5629	4.26885
Ao3042_01735	AO1008_06988	Contig132:82449-88862	9.48531	9.60556	8.48883	6.6501	11.3771	9.97229
Ao3042_01737	AO1008_06986	Contig132:89347-91990	71.7441	60.6934	58.9012	165.615	96.5314	72.159
Ao3042_01738	AO1008_06985	Contig132:92244-94224	56.4217	95.1317	28.8752	277.376	161.058	184.524
Ao3042_01739	AO1008_06984	Contig132:94352-95855	30.3048	20.8858	17.4083	17.7055	23.9721	53.8816
Ao3042_01740	AO1008_06983	Contig132:96721-98260	46.1752	33.9615	15.2298	144.953	59.8187	108.209
Ao3042_01741	AO1008_06982	Contig132:100386-103107	33.5888	23.2887	8.10551	148.019	63.0665	44.0186
Ao3042_01742	AO1008_06981	Contig132:103368-105100	210.468	200.404	120.086	336.126	287.688	322.96
Ao3042_01743	AO1008_06980	Contig132:105489-106230	2.75791	1.89676	0.803904	2.78391	4.06874	4.63514
Ao3042_01744	AO1008_06979	Contig132:107136-109455	15.6086	16.5402	10.8638	37.4456	26.4115	13.8199
Ao3042_01745	AO1008_06978	Contig132:109665-111144	4.30377	6.52019	8.31825	2.23937	4.06571	3.26355
Ao3042_01746	AO1008_06977	Contig132:112166-114804	32.2077	17.9596	21.1617	52.6905	32.123	19.7131
Ao3042_01747	AO1008_06976	Contig132:115096-121001	59.1093	38.7453	32.3923	28.4526	37.7267	39.7739
Ao3042_01750	AO1008_06973	Contig132:124633-125065	0	0	0	0	0	0.542469
Ao3042_01751	AO1008_06972	Contig132:127865-129484	9.29793	16.0698	28.0569	17.8917	7.60484	11.0695
Ao3042_01752	AO1008_06971	Contig132:129579-131532	14.4875	28.5556	56.7608	5.04116	7.51055	10.7593
Ao3042_01753	AO1008_06970	Contig132:133863-134325	0.782861	1.76812	2.23597	1.11036	0.506333	3.13548
Ao3042_01754	AO1008_06969	Contig132:134920-140029	4.03345	3.64996	2.99554	3.71922	4.71127	8.42737
Ao3042_01755	AO1008_06968	Contig132:141379-142039	14.1916	6.94061	9.2803	6.89132	3.7621	2.43361
Ao3042_01756	AO1008_06967	Contig132:144550-146666	22.7101	6.74265	5.94629	6.71679	6.5161	9.32893
Ao3042_01757	AO1008_06966	Contig132:147027-149994	107.752	87.3228	125.339	35.9392	48.0882	63.7063
Ao3042_01758	AO1008_06965	Contig132:150020-151843	1.81107	1.16441	2.97291	5.57325	3.99283	3.88647
Ao3042_01759	AO1008_06964	Contig132:153778-154545	6.00279	5.07011	9.4081	3.18779	4.35183	10.6507
Ao3042_01760	AO1008_06963	Contig132:156856-159705	26.9087	21.7001	36.2932	34.9244	36.8273	62.6819
Ao3042_01761	AO1008_06962	Contig132:159938-160940	4.15837	5.07138	2.24715	2.63675	4.16046	2.79426
Ao3042_01762	AO1008_06961	Contig132:163645-164822	4.47819	4.65535	6.55065	2.27482	3.55389	7.91612
Ao3042_01763	AO1008_06960	Contig132:165260-166953	0.0970073	0.2872	0	0	0	0.191677
Ao3042_01764	AO1008_06959	Contig132:167723-169016	0.280581	1.04094	0.795844	0.131041	0.892736	0.972104
Ao3042_01765	AO1008_06958	Contig132:169133-169826	0	0	0.436553	0	0	0
Ao3042_01766	AO1008_06957	Contig132:169927-172648	0.249556	0.58948	0.564872	0.092835	0.126311	0.934896
Ao3042_01767	AO1008_06956	Contig132:173230-175111	1.55149	1.96597	1.81284	0.550306	1.59168	4.44775
Ao3042_01768	AO1008_06955	Contig132:180260-181641	3.10359	3.67676	1.56341	2.79734	5.77956	4.19169
Ao3042_01769	AO1008_06954	Contig132:182861-186895	3.09739	2.53662	2.91057	1.23907	2.45731	1.40998
Ao3042_01770	AO1008_06953	Contig132:182861-186895	15.0637	10.0956	22.637	0.851523	5.86168	1.67973
Ao3042_01771	AO1008_06952	Contig132:188774-190197	16.4144	17.7823	48.5861	0.746457	9.02079	2.86797
Ao3042_01772	AO1008_06951	Contig132:193821-196479	7.64132	2.26774	1.05082	7.52633	8.4866	7.15103
Ao3042_01773	AO1008_06950	Contig132:204652-206110	5.0713	2.81654	5.58857	1.18225	2.01247	1.25304
Ao3042_01774	AO1008_06949	Contig132:206689-208705	3.09315	1.60078	2.77346	3.38451	2.74456	1.22127
Ao3042_01775	AO1008_06948	Contig132:209871-211591	0.580736	37.1084	161.599	0.180436	0	6.59793
Ao3042_01776	AO1008_06947	Contig132:213340-214526	11.4488	12.335	21.9044	4.58224	10.5785	23.8761
Ao3042_01777	AO1008_06946	Contig132:215196-221501	19.8067	23.1784	21.7866	21.4112	29.7936	22.4255
Ao3042_01778	AO1008_06945	Contig132:221901-225426	56.8812	44.922	42.3556	37.552	39.2461	33.2576
Ao3042_01779	AO1008_06944	Contig132:226295-227478	649.665	722.316	367.061	327.005	385.086	397.94
Ao3042_01780	AO1008_06943	Contig132:227872-229074	16.3022	14.6781	14.6062	4.0568	11.0516	6.32982
Ao3042_01781	AO1008_06942	Contig132:229110-230617	46.611	43.6729	37.4468	7.70718	23.1337	15.3168
Ao3042_01782	AO1008_06941	Contig132:230938-232413	52.8532	52.8952	49.9457	53.0747	56.1949	77.3283
Ao3042_01783	AO1008_06940	Contig132:232922-234005	266.674	336.904	491.595	188.993	288.568	392.365
Ao3042_01784	AO1008_06939	Contig132:234362-236066	9.97541	12.1419	11.9722	5.21301	9.70009	9.66935
Ao3042_01785	AO1008_06938	Contig132:236786-237950	5.83387	9.69329	9.09261	2.88926	7.65851	7.31391
Ao3042_01786	AO1008_06937	Contig132:239426-240458	1.29207	1.06543	2.17196	0.536476	0.365502	1.98986
Ao3042_01787	AO1008_06936	Contig132:241064-242512	10.9162	12.2119	31.3591	5.29889	8.06563	19.491
Ao3042_01788	AO1008_06935	Contig132:244312-245368	0.27967	0	0	0	0.355925	0.138418
Ao3042_01789	AO1008_06934	Contig132:245518-246698	9.0237	44.0304	12.1142	2.19779	19.9607	64.8295
Ao3042_01790	AO1008_06933	Contig132:249100-251187	3.53324	3.98202	2.22361	0.783651	1.49353	2.32575
Ao3042_01791	AO1008_06932	Contig132:251424-253004	12.6716	16.6369	22.7482	19.3734	21.9608	22.5614
Ao3042_01792	AO1008_06931	Contig132:257931-259485	20.8997	10.0849	9.95241	13.7173	20.7507	5.83364
Ao3042_01793	AO1008_06930	Contig132:262112-262826	9.43142	4.94479	10.9368	3.10471	4.24862	5.75317
Ao3042_01794	AO1008_06929	Contig132:263127-264793	87.0136	108.746	104.198	65.859	76.2839	63.8756
Ao3042_01795	AO1008_06928	Contig132:265684-267461	20.8204	9.82476	14.6824	18.4111	20.132	20.6346
Ao3042_01796	AO1008_06927	Contig132:268210-269201	5.56534	7.14695	9.95766	3.51415	8.42849	2.97924
Ao3042_01797	AO1008_06926	Contig132:269887-270670	0	0	0	0	0	0
Ao3042_01798	AO1008_06925	Contig132:273212-274613	1.01386	0.333816	0.638568	0.420335	0.286235	0.668239
Ao3042_01799	AO1008_06924	Contig132:275474-276881	28.0522	34.2032	36.0336	26.9721	31.0278	30.7476
Ao3042_01800	AO1008_06923	Contig132:277031-283681	57.3637	68.556	45.5638	73.2325	69.3921	55.6424
Ao3042_01801	AO1008_06922	Contig132:284458-285804	28.5272	23.0385	32.1294	15.7571	16.9122	16.5897
Ao3042_01802	AO1008_06921	Contig132:286186-287534	0	0	0	0.208173	0	0
Ao3042_01803	AO1008_06920	Contig132:290645-292291	11.1632	5.09403	4.392	15.5184	13.8103	8.08626
Ao3042_01804	AO1008_10609	Contig132:294699-296804	10.1407	11.0645	12.5667	14.6443	10.5257	13.9042
Ao3042_01805	AO1008_10608	Contig132:297163-299400	6.14709	3.82431	6.5935	7.82856	11.3096	11.9368
Ao3042_01806	AO1008_10607	Contig132:299829-302964	25.6893	14.2245	15.013	23.9632	22.2599	18.363
Ao3042_01807	AO1008_10606	Contig132:303133-305040	283.749	47.4543	40.3902	254.669	405.655	146.126
Ao3042_01809	AO1008_09909	Contig133:2650-3688	0.142613	3.17494	114.349	0	0	3.67083
Ao3042_01810	AO1008_09910	Contig133:10117-11929	2.90272	1.43156	0.498271	16.2269	7.25225	5.03821
Ao3042_01811	AO1008_09911	Contig133:11999-13099	1.11247	0.236092	0.902009	2.37727	0.810015	1.10215
Ao3042_01812	AO1008_09912	Contig133:13154-13807	2.50234	0	0.594292	3.24091	1.61019	2.80863
Ao3042_01813	AO1008_09913	Contig133:19349-19871	0	0	0	0	0	0
Ao3042_01814	AO1008_09914	Contig133:21176-23121	18.622	50.0317	51.5829	1.74205	7.21729	11.8818
Ao3042_01815	AO1008_09915	Contig133:26973-27378	0	0	1.8058	0	0	0
Ao3042_01816	AO1008_09916	Contig133:29272-30787	0.2255	0	0.213042	0	0	1.22618
Ao3042_01817	AO1008_09917	Contig133:32539-33382	0	0.27031	0	0	0	0
Ao3042_01818	AO1008_09918	Contig133:33534-34680	0.127425	2.07853	0.963476	1.1895	1.13428	2.26914
Ao3042_01819	AO1008_09919	Contig133:37039-38788	0.479466	0.472707	0.754283	0.0744248	1.0131	1.10442
Ao3042_01820	AO1008_09920	Contig133:41644-45339	1.16814	1.19665	4.24199	2.17694	0.341976	0.354983
Ao3042_01821	AO1008_09921	Contig133:46243-47893	0.563024	2.22212	3.72151	0.262362	0.238143	0.463467
Ao3042_01823	AO1008_09923	Contig133:53470-57188	3.19399	9.311	7.32893	4.29221	4.67114	7.24229
Ao3042_01824	AO1008_09765	Contig135:742-2128	44.1089	50.8117	47.1169	49.1012	50.5793	59.2698
Ao3042_01825	AO1008_09764	Contig135:3213-4324	15.7057	5.67712	55.6408	0.369687	1.84669	9.01117
Ao3042_01826	AO1008_09763	Contig135:4733-6108	6.75476	48.4158	41.3731	0	1.79893	3.98465
Ao3042_01828	AO1008_09761	Contig135:7104-8127	1.45013	2.36781	1.09699	0.948382	0.553842	0.574311
Ao3042_01829	AO1008_09760	Contig135:8597-13014	0.269935	0.854415	0.872585	0.21506	0.780153	0.151988
Ao3042_01830	AO1008_09759	Contig135:15146-17183	0.16223	0	0	0	0	0
Ao3042_01831	AO1008_09758	Contig135:18086-21042	0.125577	0.185528	1.42172	0.0584295	0	0.495488
Ao3042_01832	AO1008_09757	Contig135:21467-22820	0.105825	0.626929	3.39863	0	0	0.104592
Ao3042_01833	AO1008_09756	Contig135:30939-32017	122.936	93.303	145.071	8.58394	12.0682	12.5622
Ao3042_01834	#N/A	Contig135:33317-33704	0	0	31.9274	0	0	4.5885
Ao3042_01835	AO1008_09754	Contig135:39826-42917	9.60526	0.78359	0.500539	0.246802	0.873119	0.941837
Ao3042_01836	AO1008_09753	Contig135:42937-44124	0	0	0	0	0	0
Ao3042_01837	AO1008_09752	Contig135:45927-46380	0	0	0	0	0	0
Ao3042_01838	AO1008_09751	Contig135:46701-47607	0.16693	3.22531	0.94766	0	0.212815	0
Ao3042_01839	AO1008_09750	Contig135:47704-48527	0.414096	0.616876	1.56895	0.582071	0	0
Ao3042_01840	AO1008_09749	Contig135:48678-50917	0	0	0	0	0	0
Ao3042_01841	AO1008_09748	Contig135:51569-52786	0	0.185638	0.946616	0	0	0.247705
Ao3042_01842	AO1008_00577	Contig135:54868-57746	2.8305	2.54526	1.62545	3.77899	3.19466	4.18788
Ao3042_01843	AO1008_00576	Contig135:58923-59682	22.6935	31.4953	33.643	24.8666	28.7517	48.6729
Ao3042_01844	AO1008_00575	Contig135:60105-61896	0	0	0.990058	0	0.222397	0
Ao3042_01845	AO1008_00574	Contig135:62281-63418	0.143563	0	1.35747	0.134119	0	0
Ao3042_01846	AO1008_02452	Contig135:74591-75357	30.1389	42.8845	30.3662	25.2894	20.1011	32.3913
Ao3042_01847	AO1008_02451	Contig135:75746-77037	0.317067	0	0	0	0	0.157061
Ao3042_01848	AO1008_02450	Contig135:77330-79756	9.35066	10.7316	8.39534	5.18784	8.41408	35.7176
Ao3042_01849	AO1008_02449	Contig135:80470-80947	0.374419	9.01124	1.42519	0	0	0
Ao3042_01850	AO1008_02448	Contig135:80987-81950	0.543626	1.07817	0	0	0	0
Ao3042_01851	AO1008_02447	Contig135:81963-82554	0	0	0	0	0.361482	0.841209
Ao3042_01852	AO1008_02446	Contig135:82630-84025	0.810463	3.25992	2.62544	0.648112	0.294244	0.457931
Ao3042_01853	AO1008_02445	Contig135:84542-85136	0	0	0	0	0	0
Ao3042_01854	AO1008_02444	Contig135:86998-87784	0	0	0	0	0	0
Ao3042_01855	AO1008_02443	Contig135:88933-89901	1.65029	1.05536	1.34092	0.442467	2.41516	1.6407
Ao3042_01856	AO1008_02442	Contig135:90914-91735	0	20.911	113.157	0	1.46543	5.68328
Ao3042_01857	AO1008_02441	Contig135:93763-95161	44.8061	58.0336	31.2327	3.23539	9.32965	1.61372
Ao3042_01859	AO1008_02439	Contig135:98003-99182	100.622	16.9708	3.78404	42.994	36.9328	5.377
Ao3042_01860	AO1008_02438	Contig135:99763-100726	2.02126	0.692801	0.29413	1.88938	2.57497	2.31024
Ao3042_01861	AO1008_02437	Contig135:102325-103505	15.1933	15.4812	28.4734	28.1251	34.9553	66.6728
Ao3042_01862	AO1008_02436	Contig135:106584-109238	1.56267	3.75914	7.00973	0.18208	1.36358	2.99129
Ao3042_01864	AO1008_02434	Contig135:109645-110932	0.142613	0.423326	0.80907	0	0.36306	0.9883
Ao3042_01865	AO1008_02433	Contig135:113132-114364	0.785408	0	1.85932	1.47124	0	1.75376
Ao3042_01866	AO1008_02432	Contig135:116255-117135	4.56002	9.89677	4.67704	7.29395	10.1887	8.10569
Ao3042_01867	AO1008_02431	Contig135:118413-119374	0.656931	2.93789	2.9048	0	0	1.30523
Ao3042_01868	AO1008_02430	Contig135:119462-120980	19.7288	53.0617	44.8254	15.7499	22.0651	47.5711
Ao3042_01869	AO1008_02429	Contig135:121028-122819	17.8364	49.0632	59.694	1.16054	6.12141	13.5314
Ao3042_01870	AO1008_02428	Contig135:123534-124464	0	0	0.612691	0	0	0
Ao3042_01871	AO1008_02427	Contig135:125451-127723	0.369196	0.272707	1.27714	0.114515	0.155837	0.606939
Ao3042_01872	AO1008_02426	Contig135:128301-130237	0.372107	0.963735	1.40544	0	0	0.551336
Ao3042_01873	AO1008_02425	Contig135:132032-132812	0.996907	2.0782	0.755266	4.48247	4.07549	21.1748
Ao3042_01874	AO1008_02424	Contig135:132919-133519	0.276043	0.825724	1.57182	2.33593	0.708816	4.949
Ao3042_01875	AO1008_02423	Contig135:134076-135738	0.168909	0.249857	0	0.550716	0.642607	2.25152
Ao3042_01876	AO1008_02422	Contig135:136230-137126	13.36	32.6792	25.9232	28.7896	40.3229	39.2239
Ao3042_01877	AO1008_02421	Contig135:137252-139605	2.52607	4.8809	3.30006	2.59205	4.59403	10.4153
Ao3042_01878	AO1008_02420	Contig135:142901-144263	0.735356	0.466736	0.198453	0	0.133396	0.415291
Ao3042_01879	AO1008_02419	Contig135:144361-146234	12.1093	33.3159	21.2665	2.21241	5.3429	12.028
Ao3042_01880	AO1008_02418	Contig135:146318-148462	240.783	115.497	74.2671	347.483	364.201	320.273
Ao3042_01881	AO1008_02417	Contig135:148828-150880	354.188	415.748	325.069	116.673	247.977	344.218
Ao3042_01882	AO1008_02416	Contig135:151704-153930	93.4078	67.0258	63.135	21.3546	42.1037	52.1889
Ao3042_01883	AO1008_02415	Contig135:154591-156179	65.3661	59.35	69.1331	7.89883	27.4442	46.0443
Ao3042_01884	AO1008_02414	Contig135:158045-159504	275.273	247.207	134.438	194.961	277.079	108.611
Ao3042_01885	AO1008_02413	Contig135:160831-161546	1.38912	2.4934	4.7461	1.30622	1.42694	3.04414
Ao3042_01886	AO1008_02412	Contig135:161565-163651	7.22943	14.5037	9.25619	2.86394	5.79536	9.68119
Ao3042_01887	AO1008_02411	Contig135:164706-167366	0.134813	0	0.127206	0	0	0.66505
Ao3042_01888	AO1008_02410	Contig135:167366-168338	8.61371	16.4475	21.8225	11.6453	23.3158	34.8892
Ao3042_01889	AO1008_02409	Contig135:168876-172081	5.42452	9.05962	9.35751	3.16647	5.15868	5.55308
Ao3042_01890	AO1008_02408	Contig135:172819-174935	0	0	0.143901	0	0	0
Ao3042_01891	AO1008_02407	Contig135:177925-178972	1.55331	1.46695	2.40325	0.395717	1.79728	1.81725
Ao3042_01892	AO1008_02406	Contig135:179966-180442	0	0	0	0	0	0
Ao3042_01893	AO1008_02405	Contig135:180562-181859	0.660576	0	0.499533	0	1.17638	1.17658
Ao3042_01894	AO1008_02404	Contig135:182760-184331	0.0938374	0	0	0	0	0
Ao3042_01895	AO1008_02403	Contig135:184696-185575	0.184837	0	0.349946	0	0	0
Ao3042_01896	AO1008_02402	Contig135:186025-187708	6.55127	6.88632	4.39449	9.71718	7.21565	9.02279
Ao3042_01897	AO1008_02401	Contig135:187815-188456	0	0	0	0.713879	0	0
Ao3042_01898	AO1008_02400	Contig135:190363-192313	76.6855	84.9599	27.5945	18.7819	28.4396	33.1802
Ao3042_01899	AO1008_02399	Contig135:192345-194318	43.1205	49.3272	41.5792	57.0238	67.7287	52.1759
Ao3042_01900	AO1008_00603	Contig135:197363-202207	30.5985	49.1708	36.362	10.5587	26.3143	22.843
Ao3042_01901	AO1008_00602	Contig135:197363-202207	4.25322	4.11978	3.16114	4.78246	6.57734	3.23293
Ao3042_01902	AO1008_00601	Contig135:203095-204988	14.6854	9.40123	7.14435	16.9873	15.159	7.24726
Ao3042_01903	AO1008_00600	Contig135:205376-206908	3.51816	18.001	52.3662	3.47969	5.28023	3.89876
Ao3042_01904	AO1008_00599	Contig135:207359-208580	7.6241	10.3177	11.1267	4.87101	6.46607	5.95641
Ao3042_01905	AO1008_00598	Contig135:208953-210885	1.93826	1.27336	0.948433	0.267331	1.36445	7.155
Ao3042_01906	AO1008_00597	Contig135:211670-212087	0	0	0	0	0	0
Ao3042_01907	AO1008_00596	Contig135:214011-216009	0	0	0	0	0	0
Ao3042_01908	AO1008_00595	Contig135:219273-220760	57.0527	78.2862	63.8312	80.2419	98.1589	176.185
Ao3042_01909	AO1008_00594	Contig135:221318-224837	2.00576	1.32277	1.61992	2.29798	4.01304	5.73833
Ao3042_01910	AO1008_00593	Contig135:221318-224837	15.118	24.0912	18.4395	15.617	15.5154	12.645
Ao3042_01911	AO1008_00592	Contig135:225072-226554	0	0	0	0.116522	0	0
Ao3042_01912	AO1008_00591	Contig135:227188-227671	0	0	0	0	0	0
Ao3042_01913	AO1008_00590	Contig135:231909-232479	0	0	0	0	0	0
Ao3042_01914	AO1008_00589	Contig135:232884-234300	6.74243	10.5789	10.4546	10.8829	16.0966	18.0975
Ao3042_01915	AO1008_00588	Contig135:234838-238685	8.62213	11.3876	7.87479	6.35973	11.4087	11.598
Ao3042_01916	AO1008_00587	Contig135:234838-238685	10.3308	6.30472	7.22289	9.86347	11.8903	8.41704
Ao3042_01917	AO1008_00586	Contig135:240156-242625	164.572	203.804	200.972	315.513	233.998	235.811
Ao3042_01918	AO1008_00585	Contig135:243067-244606	31.9952	36.2981	36.7797	32.0361	24.4445	25.1057
Ao3042_01919	AO1008_00584	Contig135:246605-247241	348.355	244.701	204.716	6.01957	16.434	18.876
Ao3042_01920	AO1008_00583	Contig135:247453-249291	1.42733	2.60808	9.66968	2.11172	10.4342	27.5228
Ao3042_01921	AO1008_00582	Contig135:251248-252932	2.04117	1.96964	2.34608	1.65378	3.71497	7.53742
Ao3042_01922	AO1008_00581	Contig135:254735-259516	0.163408	0.144603	0.123233	0	0	0.289746
Ao3042_01923	AO1008_00580	Contig135:263684-266663	0.425068	0.697156	3.29599	0.043918	0.298761	0.838006
Ao3042_01924	AO1008_00579	Contig135:267016-267380	0	3.30295	4.13499	0	0	0.72916
Ao3042_01925	AO1008_00578	Contig135:267579-269010	2.05706	1.90662	2.9164	2.04037	3.76057	2.67118
Ao3042_01926	AO1008_07472	Contig139:168-2931	19.3011	19.275	12.5545	21.1414	32.4584	31.8498
Ao3042_01927	AO1008_07471	Contig139:3507-5909	27.4986	17.0038	30.8739	36.4728	27.3383	33.5682
Ao3042_01928	AO1008_07470	Contig139:6016-8360	36.2654	31.8164	37.2502	30.7517	33.6983	40.4719
Ao3042_01929	AO1008_07469	Contig139:8479-15152	3.47665	6.45601	2.09986	6.16007	4.15194	4.56257
Ao3042_01930	AO1008_07468	Contig139:8479-15152	11.1475	3.991	6.85519	16.7692	10.832	5.85018
Ao3042_01931	AO1008_07467	Contig139:15476-21633	18.1513	18.3734	17.8478	15.7612	14.4743	16.4077
Ao3042_01932	AO1008_07466	Contig139:21648-24716	16.8568	17.4729	15.107	29.2579	36.2973	12.8834
Ao3042_01933	AO1008_07465	Contig139:24800-26360	13.8692	7.53402	14.8888	19.9058	15.4523	16.9573
Ao3042_01934	AO1008_07464	Contig139:26433-28892	2.74761	5.22898	22.9415	2.28819	4.10439	5.67435
Ao3042_01935	AO1008_07463	Contig139:26433-28892	192.302	186.888	229.672	163.671	157.543	148.926
Ao3042_01936	AO1008_07462	Contig139:28948-30094	134.628	102.847	93.8561	96.6386	128.868	109.046
Ao3042_01937	AO1008_07461	Contig139:32045-33134	61.9895	57.477	62.6188	62.3959	65.0736	97.1918
Ao3042_01938	AO1008_07460	Contig139:33202-34543	40.3989	26.4356	22.6139	80.5314	43.5689	28.8383
Ao3042_01939	AO1008_07459	Contig139:36017-38706	1119.59	1035.65	881.002	1847.13	1276.8	1041.78
Ao3042_01940	AO1008_07458	Contig139:38911-42209	22.3905	44.5338	51.0855	79.0125	60.6512	48.2618
Ao3042_01941	AO1008_07457	Contig139:42955-45806	14.1335	14.6808	19.8996	20.8903	24.5273	24.7823
Ao3042_01942	AO1008_07456	Contig139:46043-51983	24.63	29.0239	43.6135	14.6097	25.4901	31.3492
Ao3042_01943	AO1008_07455	Contig139:52287-54047	56.7776	29.8991	45.2617	70.0972	60.3652	38.5315
Ao3042_01944	AO1008_07454	Contig139:54211-56828	16.5176	15.661	20.3354	52.3187	35.7736	44.0369
Ao3042_01945	AO1008_07453	Contig139:54211-56828	13.2502	18.3965	37.2708	21.7798	18.9368	23.3593
Ao3042_01946	AO1008_07452	Contig139:54211-56828	0.401135	0	0	0.626867	0	0
Ao3042_01947	AO1008_07451	Contig139:56834-59432	30.5338	20.7121	18.3016	15.9347	20.8405	16.7092
Ao3042_01948	AO1008_07450	Contig139:61927-66333	24.4293	20.0263	15.4112	27.797	21.0471	14.0213
Ao3042_01949	AO1008_07449	Contig139:61927-66333	29.5388	25.7048	27.4832	46.8244	29.5521	31.4755
Ao3042_01950	AO1008_07448	Contig139:66532-68497	1.3961	0.344057	0.878463	0.722278	1.17979	0.612472
Ao3042_01951	AO1008_07447	Contig139:69162-69919	0	0.343527	0	0	0	0
Ao3042_01952	AO1008_07446	Contig139:70945-74327	20.6404	21.6842	24.8239	22.3611	27.3793	28.9625
Ao3042_01953	AO1008_07445	Contig139:76918-78872	13.0353	9.52436	14.8777	16.3722	19.3074	23.0391
Ao3042_01954	AO1008_07444	Contig139:78904-79966	28.4412	23.4242	23.063	40.1199	35.4202	41.7094
Ao3042_01955	AO1008_07443	Contig139:81308-82486	48.9921	66.3639	82.0899	67.6609	58.7591	110.247
Ao3042_01956	AO1008_07442	Contig139:87681-92286	61.473	65.3988	52.7852	47.6443	57.0968	56.3874
Ao3042_01957	AO1008_07441	Contig139:87681-92286	8.2021	7.39262	7.89654	15.5466	13.1474	13.1769
Ao3042_01958	AO1008_07440	Contig139:92506-94765	9.82982	8.45594	6.92608	16.847	11.7389	8.16192
Ao3042_01959	AO1008_07439	Contig139:95329-97441	150.174	158.315	167.699	520.511	357.288	374.815
Ao3042_01960	AO1008_07438	Contig139:97507-98816	76.0473	47.2693	62.024	128.311	92.6666	93.8212
Ao3042_01961	AO1008_07437	Contig139:105494-106021	3.16513	0.966731	8.49418	0	8.31913	4.48653
Ao3042_01962	AO1008_07436	Contig139:108048-109326	116.594	146.089	137.299	189.378	176.085	181.087
Ao3042_01963	AO1008_07435	Contig139:109341-112430	33.0332	39.2192	41.7918	23.5646	31.8295	44.0403
Ao3042_01964	AO1008_07434	Contig139:112495-113931	13.6006	12.6247	11.6946	17.9132	15.7502	9.79766
Ao3042_01965	AO1008_07433	Contig139:114128-117914	19.5799	29.1972	30.1778	58.3448	57.1023	45.6243
Ao3042_01966	AO1008_07432	Contig139:114128-117914	27.4887	24.5568	26.7036	26.5433	36.2464	35.3086
Ao3042_01967	AO1008_07431	Contig139:119376-121649	9.11352	8.46978	17.4231	13.871	14.902	14.1678
Ao3042_01968	AO1008_07430	Contig139:121862-124386	28.3003	12.7897	13.9886	42.1772	48.3641	27.8525
Ao3042_01969	AO1008_07429	Contig139:124613-125579	19.0555	6.67277	9.37817	13.757	17.7619	33.6073
Ao3042_01970	AO1008_07428	Contig139:126097-128687	35.4707	23.8487	27.0645	30.6025	37.7686	39.2468
Ao3042_01971	AO1008_07427	Contig139:128768-132285	27.9664	20.2183	25.812	31.1373	28.0415	29.5261
Ao3042_01972	AO1008_07426	Contig139:128768-132285	2.26728	1.08078	2.62409	6.73505	1.05518	1.03877
Ao3042_01973	AO1008_07425	Contig139:132369-134217	21.9423	17.9087	31.6053	27.401	27.5114	23.4276
Ao3042_01974	AO1008_07424	Contig139:134229-135205	107.001	139.949	132.632	262.462	231.987	349.581
Ao3042_01975	AO1008_07423	Contig139:135424-137871	15.4369	12.2113	16.6892	18.9877	19.1039	28.6233
Ao3042_01976	AO1008_07422	Contig139:140450-142526	7.28279	6.86826	6.54502	4.6487	9.4904	13.3455
Ao3042_01977	AO1008_07421	Contig139:144446-148771	13.8993	21.5882	26.7267	16.4079	19.7083	26.2887
Ao3042_01978	AO1008_07420	Contig139:158531-159804	0	0	0	0.644787	0	0
Ao3042_01979	AO1008_07419	Contig139:162447-163711	9.754	13.7443	10.6964	8.76502	16.6838	19.2934
Ao3042_01980	AO1008_07418	Contig139:168000-172941	5.83004	16.9082	21.2028	1.83943	6.01137	11.8356
Ao3042_01981	AO1008_07417	Contig139:174192-177105	10.0305	15.3099	17.6546	6.20336	7.58987	9.17292
Ao3042_01982	AO1008_07416	Contig139:179678-183459	4.2173	4.67915	6.66071	5.89595	5.46837	8.41658
Ao3042_01983	AO1008_07415	Contig139:183474-184450	64.1436	75.7062	93.5348	81.1277	71.1728	74.904
Ao3042_01984	AO1008_07414	Contig139:184619-189664	24.9344	45.4931	48.9518	16.1607	21.1691	33.4121
Ao3042_01985	AO1008_07413	Contig139:194980-196805	404.67	209.673	134.85	269.646	324.466	321.977
Ao3042_01986	AO1008_07412	Contig139:197072-201046	13.0802	6.43112	8.41485	21.3119	19.1385	13.7992
Ao3042_01987	AO1008_07411	Contig139:201351-206913	18.3722	17.0846	17.7635	18.0152	18.5489	20.5983
Ao3042_01988	AO1008_07410	Contig139:207191-211611	27.7073	27.7715	27.2884	46.9806	35.5311	29.1763
Ao3042_01989	AO1008_07409	Contig139:212871-214880	33.2685	21.6029	22.2464	41.2212	49.4762	53.4923
Ao3042_01990	AO1008_07408	Contig139:212871-214880	106.5	35.6797	45.124	127.541	143.654	115.892
Ao3042_01991	AO1008_07407	Contig139:215229-217874	27.7293	43.3023	27.5499	28.1475	32.4093	35.2183
Ao3042_01992	AO1008_07406	Contig139:215229-217874	29.1715	34.4763	33.4044	50.8946	44.6975	58.911
Ao3042_01993	AO1008_07405	Contig139:218179-220723	14.1202	7.14501	8.91501	20.0962	15.4531	11.1506
Ao3042_01994	AO1008_07404	Contig139:221067-222411	23.149	22.5889	25.8647	28.4439	29.6897	44.4495
Ao3042_01995	AO1008_07403	Contig139:222737-229399	15.2502	9.70235	10.5403	11.1155	10.3733	7.70031
Ao3042_01996	AO1008_07402	Contig139:229599-232767	18.1817	11.8394	17.2962	23.8542	19.1168	18.0316
Ao3042_01997	AO1008_07401	Contig139:229599-232767	3.4705	3.21908	3.65675	5.13127	5.40514	3.66269
Ao3042_01999	AO1008_07399	Contig139:233495-237642	31.0706	17.872	21.7549	70.5428	52.4549	41.2587
Ao3042_02000	AO1008_07398	Contig139:233495-237642	18.0407	10.1045	19.3543	22.9165	18.6236	30.015
Ao3042_02002	AO1008_07396	Contig139:240756-242358	22.0297	21.8037	18.2076	26.9627	28.2443	12.4567
Ao3042_02003	AO1008_07395	Contig139:244776-250186	69.665	54.9827	57.9459	66.8419	61.8822	46.9124
Ao3042_02004	AO1008_07394	Contig139:250335-256489	13.8643	10.3221	11.3031	8.7934	11.2734	8.67916
Ao3042_02005	AO1008_07393	Contig139:250335-256489	13.2158	31.1341	36.4644	12.4056	15.9845	21.586
Ao3042_02006	AO1008_07392	Contig139:257205-262380	10.9544	10.3567	10.0992	19.5741	16.4697	16.0724
Ao3042_02007	AO1008_07391	Contig139:262524-264015	26.7853	32.6908	41.8995	39.3672	36.1942	42.5713
Ao3042_02008	AO1008_07390	Contig139:264104-265077	28.5758	21.2192	20.6339	30.8733	32.6813	27.2388
Ao3042_02009	AO1008_10582	Contig140:12460-14581	14.5387	37.004	31.8566	12.6104	16.5343	49.8282
Ao3042_02010	AO1008_10581	Contig140:14774-19869	13.8938	12.0752	14.267	13.4324	16.914	13.5447
Ao3042_02012	AO1008_10579	Contig140:20065-22341	18.1327	24.5937	30.2439	17.2763	20.6108	16.9701
Ao3042_02013	AO1008_10578	Contig140:22519-27614	60.8398	79.023	86.2101	52.7997	62.665	69.1758
Ao3042_02014	AO1008_10577	Contig140:22519-27614	194.803	52.5425	5.61425	72.8136	275.713	37.5469
Ao3042_02015	AO1008_10236	Contig140.1:6656-11069	16.0342	13.15	12.9106	20.0981	16.7545	13.1577
Ao3042_02016	AO1008_10235	Contig140.1:11356-13746	87.2981	81.0866	73.0296	90.1743	81.796	50.6378
Ao3042_02017	AO1008_10234	Contig140.1:14352-18238	9.0398	5.20651	6.58705	17.8069	15.4352	6.38699
Ao3042_02018	AO1008_10233	Contig140.1:18296-19781	29.701	23.8897	26.3335	26.3476	26.2996	22.454
Ao3042_02019	AO1008_10232	Contig140.1:19786-20780	35.824	38.28	72.5787	42.1621	63.3734	45.4227
Ao3042_02020	AO1008_10231	Contig140.1:21240-22805	107.514	226.319	140.386	426.696	220.212	221.568
Ao3042_02021	AO1008_10230	Contig140.1:24658-25230	271.63	362.379	576.814	62.3295	106.992	189.061
Ao3042_02022	AO1008_10229	Contig140.1:25425-27361	9.20856	7.3558	13.877	17.8395	14.9643	15.3181
Ao3042_02023	AO1008_10228	Contig140.1:27688-29126	53.9168	47.7226	51.2219	215.295	193.202	132.851
Ao3042_02024	AO1008_10227	Contig140.1:29508-31217	87.2314	55.5567	53.8611	208.878	104.944	62.122
Ao3042_02025	AO1008_10226	Contig140.1:31762-34015	48.1905	40.9496	54.947	25.3967	31.1662	32.5094
Ao3042_02026	AO1008_10225	Contig140.1:35395-36874	15.9249	13.1325	13.8979	16.4439	20.0883	17.8271
Ao3042_02027	AO1008_10224	Contig140.1:37068-38488	193.237	288.074	302.878	157.4	201.31	215.877
Ao3042_02028	AO1008_10223	Contig140.1:39394-40664	25.2907	289.947	87.2116	5.25685	49.0558	137.032
Ao3042_02029	AO1008_10222	Contig140.1:41003-43298	40.0859	75.5384	130.413	10.5612	36.61	68.1721
Ao3042_02031	AO1008_10220	Contig140.1:46328-48063	66.9053	10.8484	19.9352	33.5595	63.5678	9.39027
Ao3042_02032	AO1008_10219	Contig140.1:48257-52262	55.0281	42.2257	46.7864	45.4652	39.5348	70.7664
Ao3042_02033	AO1008_10218	Contig140.1:52424-56076	83.0656	72.4163	65.7003	37.064	50.9138	77.3135
Ao3042_02034	AO1008_10217	Contig140.1:59380-61145	277.034	140.568	101.719	622.123	666.672	383.638
Ao3042_02035	AO1008_10216	Contig140.1:63100-64792	1.06277	0.393114	0.334463	0.742664	1.3481	1.74927
Ao3042_02036	AO1008_10215	Contig140.1:66202-69456	18.2405	20.1095	27.874	5.79822	12.6967	14.1876
Ao3042_02037	AO1008_10214	Contig140.1:70145-72598	56.6984	59.5361	90.8565	39.4271	60.8293	60.6296
Ao3042_02038	AO1008_10213	Contig140.1:70145-72598	44.8608	64.2474	92.5201	68.9266	75.3503	66.6634
Ao3042_02039	AO1008_10212	Contig140.1:73256-74938	783.23	595.455	871.154	790.845	996.751	434.242
Ao3042_02040	AO1008_10211	Contig140.1:76064-77709	27.1858	18.001	24.169	20.7787	21.7979	18.6508
Ao3042_02041	AO1008_10210	Contig140.1:77779-79490	158.889	121.194	185.037	157.183	233.07	153.938
Ao3042_02042	AO1008_10209	Contig140.1:79697-81862	349.753	53.5861	90.5453	177.592	434.544	112.561
Ao3042_02043	AO1008_10208	Contig140.1:84046-86938	101.256	74.7181	85.3073	73.6225	90.7379	77.0977
Ao3042_02044	AO1008_10207	Contig140.1:87085-88985	50.9488	45.2563	36.6524	89.5353	44.1871	44.8572
Ao3042_02045	AO1008_10206	Contig140.1:89000-90935	12.8445	10.8941	11.4791	35.0203	22.5887	13.7824
Ao3042_02046	AO1008_10205	Contig140.1:94486-97004	125.928	69.1612	59.9133	143.103	90.128	49.881
Ao3042_02047	AO1008_10204	Contig140.1:97208-98144	94.7877	44.5136	70.1239	27.7961	29.0616	35.469
Ao3042_02048	AO1008_10203	Contig140.1:98509-99661	43.7479	33.0736	31.4438	48.8115	41.1534	52.5027
Ao3042_02049	AO1008_10202	Contig140.1:102043-105817	51.9799	60.8695	69.1746	40.4928	59.2085	70.0525
Ao3042_02050	AO1008_10201	Contig140.1:105972-107669	77.5475	47.2482	51.7766	86.5742	69.3397	65.9084
Ao3042_02051	AO1008_10200	Contig140.1:107689-111682	56.5327	52.6657	47.4894	44.788	60.3552	67.283
Ao3042_02052	AO1008_10199	Contig140.1:112464-114875	110.155	122.16	86.3995	84.0193	114.026	149.767
Ao3042_02053	AO1008_10198	Contig140.1:116656-117524	26.875	20.1568	26.0163	53.706	57.4765	63.4257
Ao3042_02054	AO1008_10197	Contig140.1:117599-120844	22.1236	10.7452	16.8707	31.8101	29.2541	25.7478
Ao3042_02055	AO1008_10196	Contig140.1:121227-124668	31.9381	29.603	29.9173	31.759	37.0487	35.8591
Ao3042_02056	AO1008_10195	Contig140.1:124957-126146	1.6693	0.744301	1.26355	0	0.638445	0.661768
Ao3042_02057	AO1008_10194	Contig140.1:126405-127451	4.09958	4.6155	9.89086	1.58461	2.87883	6.71723
Ao3042_02058	AO1008_10193	Contig140.1:127797-131300	0.549024	1.40002	1.12974	0.0464175	0.0631555	0.442846
Ao3042_02059	AO1008_10192	Contig140.1:131842-135006	9.92161	14.8581	14.6455	16.0902	26.7429	20.5057
Ao3042_02061	AO1008_10190	Contig140.1:135534-136967	0.726497	0.307387	0.196055	0.193543	0.79067	1.12823
Ao3042_02062	AO1008_10189	Contig140.1:137793-139645	1.49808	2.96154	6.84301	0.582611	1.11108	2.9638
Ao3042_02063	AO1008_10188	Contig140.1:139795-142149	3.32438	5.23461	6.41087	5.8536	5.03672	5.49152
Ao3042_02064	AO1008_10187	Contig140.1:142700-143420	0	1.63778	0.832782	0.412053	0.562144	1.74629
Ao3042_02065	AO1008_10186	Contig140.1:146180-146571	0	2.24086	0	0	0	0.741926
Ao3042_02066	AO1008_10185	Contig140.1:147660-150875	100.393	177.421	169.065	36.6326	92.9632	131.202
Ao3042_02067	AO1008_10184	Contig140.1:151685-153831	54.9922	32.4311	35.3346	100.902	68.4832	41.0641
Ao3042_02068	AO1008_10183	Contig140.1:154098-155245	20.8823	15.8729	19.2448	39.358	26.8921	19.2414
Ao3042_02069	AO1008_10182	Contig140.1:155442-156864	50.6106	53.8325	46.8452	150.382	94.7873	51.2823
Ao3042_02070	AO1008_10181	Contig140.1:157336-158137	50.9848	23.5721	27.0632	25.1386	46.6121	34.4935
Ao3042_02071	AO1008_10180	Contig140.1:159007-160176	7.97545	8.43419	12.0772	6.63373	12.4354	6.85365
Ao3042_02072	AO1008_10179	Contig140.1:162437-165419	53.0256	46.3262	65.1246	50.903	79.123	57.365
Ao3042_02073	AO1008_10178	Contig140.1:162437-165419	0	29.5807	10.378	0	0	30.5394
Ao3042_02074	AO1008_10177	Contig140.1:166693-169228	50.9817	37.1797	33.4083	314.575	198.097	232.445
Ao3042_02075	AO1008_10176	Contig140.1:169514-171650	69.1878	135.267	421.188	4.79591	28.4672	43.4223
Ao3042_02076	AO1008_10175	Contig140.1:171664-172254	9.18038	2.45926	2.4928	0.927174	2.95656	1.63669
Ao3042_02077	AO1008_10174	Contig140.1:175178-176072	0	0	0	0.180038	0.491021	0.763071
Ao3042_02078	AO1008_10173	Contig140.1:177809-180009	55.4147	70.1595	68.4426	52.5473	66.5981	91.9333
Ao3042_02079	AO1008_10172	Contig140.1:180629-184655	38.6996	42.9616	50.2967	60.8358	44.2533	36.5653
Ao3042_02080	AO1008_10171	Contig140.1:180629-184655	72.1887	50.1478	56.6529	156.243	95.3757	67.2136
Ao3042_02081	AO1008_10170	Contig140.1:184798-188772	9.62087	13.2738	16.4122	13.2385	16.4828	13.8628
Ao3042_02082	AO1008_10169	Contig140.1:191062-193034	23.8926	24.8169	24.9759	33.7235	38.5237	39.925
Ao3042_02083	AO1008_10168	Contig140.1:193775-195152	0.311356	2.3054	4.50927	0.580629	0.922449	2.25646
Ao3042_02084	AO1008_10167	Contig140.1:196028-196461	0.858251	16.1889	166.044	1.21953	7.23396	4.73464
Ao3042_02085	AO1008_10166	Contig140.1:196561-197908	0	1.10258	8.2373	0	0.135054	0.315332
Ao3042_02086	AO1008_10165	Contig140.1:203609-205391	1.06194	0.263204	0.335015	0.165614	0.903143	0
Ao3042_02087	AO1008_10164	Contig140.1:205500-206589	30.5131	14.6217	6.8922	2.14336	4.46611	3.07319
Ao3042_02088	AO1008_10163	Contig140.1:208159-209202	0.0800525	1.90291	4.85168	0	0.408049	0.215911
Ao3042_02089	AO1008_10162	Contig140.1:212341-213198	1.66439	4.95913	6.30627	0.19497	2.65939	0.206579
Ao3042_02090	AO1008_10161	Contig140.1:215287-218880	7.39265	7.87662	7.81463	12.2498	14.2563	13.8321
Ao3042_02091	AO1008_10160	Contig140.1:218936-220340	1.05335	2.60178	3.09641	0.436797	0.892397	1.50453
Ao3042_02092	AO1008_10159	Contig140.1:220731-221301	10.0281	11.9236	10.0819	19.7078	9.47847	31.4605
Ao3042_02093	AO1008_10158	Contig140.1:221635-223121	55.654	27.4786	31.9917	99.1792	104.244	72.9207
Ao3042_02094	AO1008_10157	Contig140.1:223250-224778	24.3602	27.9275	80.6977	41.608	35.604	36.1468
Ao3042_02095	AO1008_10156	Contig140.1:225431-226922	3.725	6.21029	9.45884	12.3811	8.28369	8.97816
Ao3042_02096	AO1008_10155	Contig140.1:233246-235935	29.9678	19.3985	25.6425	4.74698	14.2605	8.56942
Ao3042_02097	AO1008_10154	Contig140.1:236562-237854	10.025	4.78575	6.31391	0.727299	4.66958	0.440475
Ao3042_02098	AO1008_10153	Contig140.1:238357-239526	0.733058	0.545268	0	1.20077	0.233885	0.727062
Ao3042_02099	AO1008_10152	Contig140.1:239816-240632	0.738243	2.20447	0.933367	0.924155	0.630656	0.244767
Ao3042_02100	AO1008_10151	Contig140.1:241087-242368	0.649292	0.192592	0	0	0	0
[truncated: 9,400 more rows]
